# Supplementary material for: Photoredox-catalyzed hydrogenation of alkenes assisted by an in situ generated PPh3(OH) radical and acetic acid
Source: Royal Society of Chemistry journal article supplement (doi:10.1039/d4qo00661e), 2024-01-01

---

## *Supporting Information*

### **Photoredox-Catalyzed Hydrogenation of Alkenes Assisted by *in situ* Generated PPh<sub>3</sub>(OH) Radical and Acetic Acid**

Zhen-Zhen Xie,<sup>a</sup> Yu Zheng,<sup>a,b</sup> Zi-Hao Liao,<sup>a</sup> Chu-Ping Yuan,<sup>a</sup> Ming-Zhi Li,<sup>a</sup> Ke-Yi Deng,<sup>a</sup> Hao-Yue Xiang,<sup>a</sup> Kai Chen,<sup>a,\*</sup> Hua Yang<sup>a,\*</sup>

<sup>a</sup>College of Chemistry and Chemical Engineering, Central South University, Changsha 410083, P. R. China. E-mail: [hyangchem@csu.edu.cn](mailto:hyangchem@csu.edu.cn); [kaichen@csu.edu.cn](mailto:kaichen@csu.edu.cn)

<sup>b</sup>School of Physical Science and Technology, ShanghaiTech University, Shanghai 201210, P. R. China

### **Table of Contents**

|                                                                            |     |
|----------------------------------------------------------------------------|-----|
| 1. General Information.....                                                | S1  |
| 2. General Procedures for the Synthesis of Alkene .....                    | S2  |
| 2.1 General procedures for the preparation of vinylpyridine .....          | S2  |
| 2.2 General procedure for the preparation of acrylamide .....              | S4  |
| 3. Experimental Details for the Preparation of Compounds <b>2-31</b> ..... | S5  |
| 3.1 Photoreaction set-up.....                                              | S5  |
| 3.2 Detailed optimization of hydrogenation reaction conditions .....       | S5  |
| 3.3 General procedure for the hydrogenation reactions of alkenes.....      | S8  |
| 3.4 Scale-up reaction.....                                                 | S9  |
| 4. Mechanistic Studies .....                                               | S11 |
| 5. Characterization Data of Compounds <b>2-31</b> .....                    | S30 |
| 6. Computational Details .....                                             | S42 |
| 6.1 Table of energies and other thermodynamic parameters. ....             | S43 |
| 6.2 Redox potential calculations. ....                                     | S43 |
| 6.3 Coordinates of all stationary points.....                              | S44 |

---

|                                                                                        |     |
|----------------------------------------------------------------------------------------|-----|
| 7. NMR Spectra of Compounds <b>1g-1h</b> , <b>1k</b> , <b>2a</b> and <b>2-31</b> ..... | S58 |
|----------------------------------------------------------------------------------------|-----|

---

## 1. General Information

Unless otherwise noted, all solvents and reagents were purchased from commercial suppliers and used without further purification. The light source for the photocatalytic reaction is manufactured by XINNENGYUAN with power of 30 W (450 nm), and the reaction is carried out in a borosilicate glass vessel without use of filters. A clip fan was placed over the reaction vials to cool down the reaction system during the whole process.  $^1\text{H}$  NMR spectra were recorded at 400 MHz. The chemical shifts were recorded in *ppm* relative to tetramethylsilane and with the solvent resonance as the internal standard. Data were reported as follows: chemical shift, multiplicity (s = singlet; d = doublet; dd = doublet of doublet; t = triplet; q = quartet; m = multiplet), coupling constants (Hz), integration.  $^{13}\text{C}$  NMR data were collected at 100 MHz with complete proton decoupling.  $^{19}\text{F}$  NMR data were collected at 376 MHz with complete proton decoupling. Infrared spectra (IR) were measured by FT-IR apparatus. High resolution mass spectroscopy (HRMS) was recorded on TOF MS ES<sup>+</sup> mass spectrometer, and acetonitrile was used to dissolve the sample. Column chromatography was carried out on silica gel (200 - 300 mesh).

## 2. General Procedures for the Synthesis of Alkene

### 2.1 General procedures for the preparation of vinylpyridine (Scheme S1)

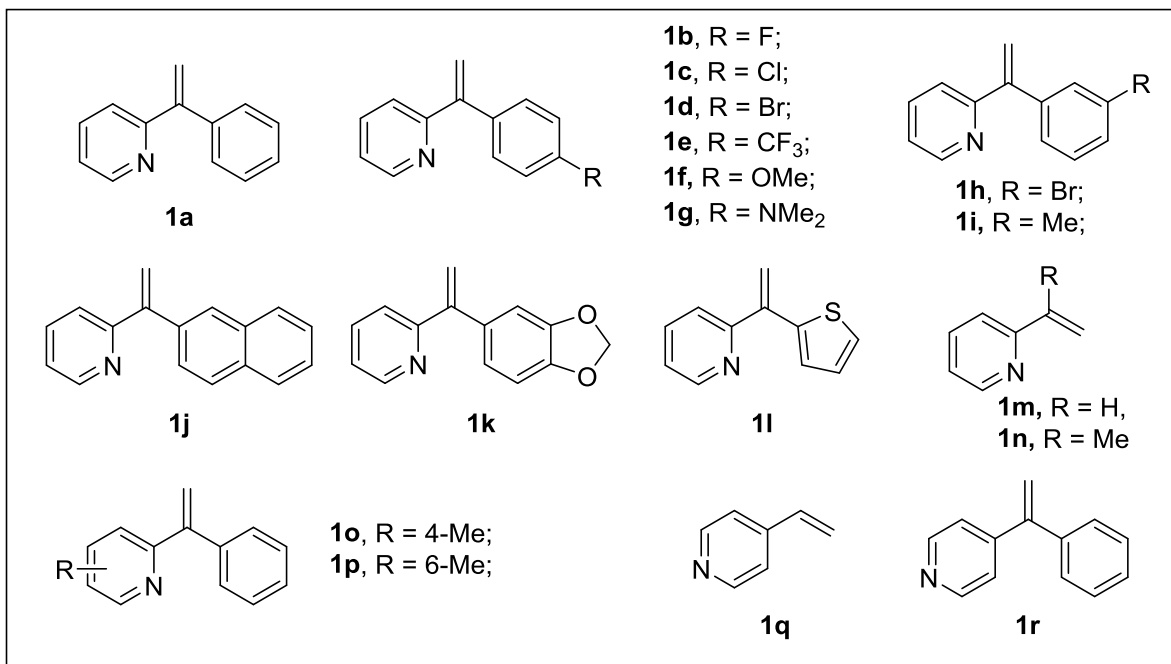

Vinylpyridines **1m** and **1q** were purchased from commercial suppliers (<https://www.energy-chemical.com/front/index.htm>) and used without further purification. And vinylpyridines **1a**, **1n**, and **1r** were prepared by Wittig reaction from the corresponding ketones according to reported literature procedures.<sup>[1]</sup> Other vinylpyridines **1b-1l** and **1o-1p** were prepared according to the reported procedures.<sup>[2]</sup>

Vinylpyridines **1a-1f**, **1i-1j**, **1l-1r** shown in Scheme S1 are known compounds.

#### Characterization data for vinylpyridines **1g-1h** and **1k**.

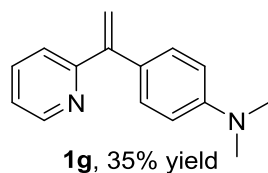

**1g**: yellow oil, 35% yield (393 mg), purified by flash chromatography (PE/EA = 10%);

**IR** (neat)  $\nu$  2920, 1519, 1467, 1225, 1061, 946, 750, 578 cm<sup>-1</sup>;

**<sup>1</sup>H NMR** (400 MHz, Chloroform-*d*)  $\delta$  8.54 (d,  $J = 4.3$  Hz, 1H), 7.51 (td,  $J = 7.7, 1.8$  Hz, 1H), 7.22 (d,  $J = 7.9$  Hz, 1H), 7.17 – 7.13 (m, 2H), 7.09 (dd,  $J = 7.4, 4.9$  Hz, 1H), 6.61 (d,  $J = 8.8$  Hz, 2H), 5.67 (d,  $J = 1.5$  Hz, 1H), 5.43 (d,  $J = 1.5$  Hz, 1H), 2.86 (s, 6H);

**<sup>13</sup>C NMR** (100 MHz, Chloroform-*d*)  $\delta$  158.4, 149.2, 148.2, 147.9, 135.1, 128.1, 127.2, 122.0, 121.2, 113.9, 111.0, 39.5;

**HRMS** (ESI): C<sub>15</sub>H<sub>17</sub>N<sub>2</sub><sup>+</sup>, [M+H]<sup>+</sup>, Calcd 225.1386, Found 225.1365.

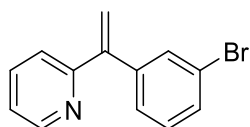

**1h**, 45% yield

**1h**: yellow oil, 45% yield (585 mg), purified by flash chromatography (PE/EA = 4%);

**IR** (neat)  $\nu$  2927, 1582, 1467, 1281, 1068, 917, 746, 582 cm<sup>-1</sup>;

**<sup>1</sup>H NMR** (400 MHz, Chloroform-*d*)  $\delta$  8.63 (d,  $J = 4.2$  Hz, 1H), 7.64 (td,  $J = 7.8, 1.7$  Hz, 1H), 7.51 (s, 1H), 7.45 (d,  $J = 7.8$  Hz, 1H), 7.27 (d,  $J = 8.2$  Hz, 2H), 7.23 – 7.19 (m, 2H), 5.99 (s, 1H), 5.60 (s, 1H);

**<sup>13</sup>C NMR** (100 MHz, Chloroform-*d*)  $\delta$  157.9, 149.5, 148.0, 142.5, 136.5, 131.4, 130.8, 129.8, 127.1, 122.7, 122.5, 118.7;

**HRMS** (ESI): C<sub>13</sub>H<sub>11</sub>BrN<sup>+</sup>, [M+H]<sup>+</sup>, Calcd 226.0069, Found 226.0057.

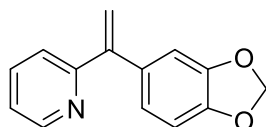

**1k**, 49% yield

**1k**: yellow oil, 49% yield (552 mg), purified by flash chromatography (PE/EA = 4%);

**IR** (neat)  $\nu$  2892, 1583, 1487, 1231, 1035, 935, 748, 558 cm<sup>-1</sup>;

**<sup>1</sup>H NMR** (400 MHz, Chloroform-*d*)  $\delta$  8.54 (d,  $J = 4.4$  Hz, 1H), 7.57 – 7.53 (m, 1H), 7.22 (d,  $J = 7.9$  Hz, 1H), 7.13 – 7.10 (m, 1H), 6.76 – 6.70 (m, 3H), 5.87 (s, 2H), 5.76 (s, 1H), 5.46 (s, 1H);

**<sup>13</sup>C NMR** (100 MHz, Chloroform-*d*)  $\delta$  158.8, 149.3, 148.8, 147.5, 147.4, 136.3, 134.5, 122.9, 122.5, 122.1, 116.8, 108.9, 108.2, 101.1;

**HRMS** (ESI): C<sub>14</sub>H<sub>12</sub>NO<sub>2</sub><sup>+</sup>, [M+H]<sup>+</sup> Calcd 226.0863, Found 226.0843.

## 2.2 General procedure for the preparation of acrylamide (Scheme S2)

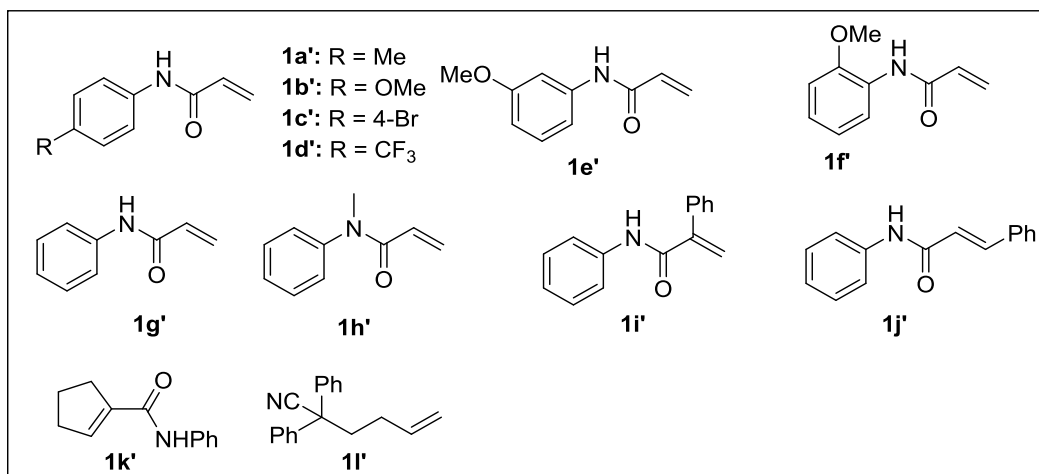

Acrylamide **1a'**-**1h'**<sup>[3]</sup>, **1i'**<sup>[4]</sup>, **1j'**<sup>[5]</sup> and **1k'**<sup>[6]</sup>, **1l'**<sup>[7]</sup> were synthesized according to reported literature procedures. And all substrates shown above are known compounds.

### 3. Experimental Details for the Preparation of Compounds 2-31

#### 3.1 Photoreaction set-up (Figure S1)

The light source used for illuminating the reaction vessel (commercial supplier Synthware) consists of blue LEDs ( $\lambda_{\max} = 450 \text{ nm}$ ) purchased from Taobao (<https://gpiled.taobao.com>). And a clip fan was placed over the reaction vials to cool down the reaction system during the whole process of the reaction.

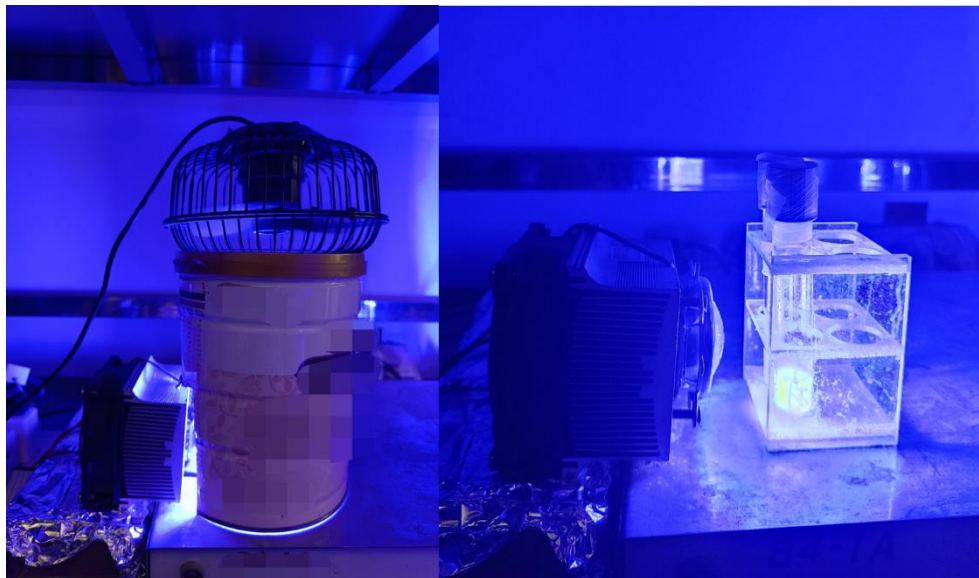

**Figure S1.** The set-up for the reaction (photographed by Zhen-Zhen Xie)

#### ※ Notes:

In the optimized reaction conditions, the reaction is not significantly affected by the reaction temperature. The fan was used to maintain the reaction temperature in a range of 25 ~ 40 °C.

#### 3.2 Detailed optimization of hydrogenation reaction conditions

**Table S1.** Control experiments<sup>a</sup>

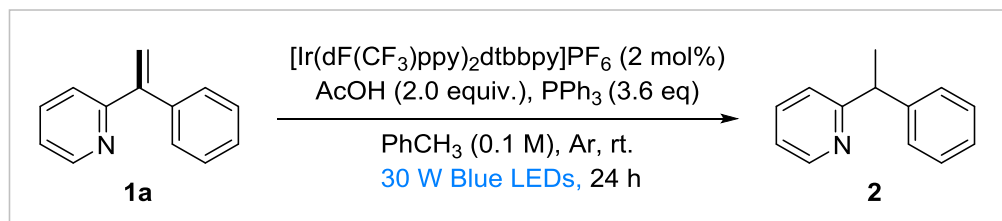

| Entry | Solvent           | Photocatalyst                                                    | LEDs | AcOH | Yield (%) |
|-------|-------------------|------------------------------------------------------------------|------|------|-----------|
| 1     | PhCH <sub>3</sub> | [Ir(dF(CF <sub>3</sub> )ppy) <sub>2</sub> dtbbpy]PF <sub>6</sub> | Blue | AcOH | 97        |
| 2     | PhCH <sub>3</sub> | [Ir(dF(CF <sub>3</sub> )ppy) <sub>2</sub> dtbbpy]PF <sub>6</sub> | Blue | --   | trace     |

|                |                   |                                                                  |      |      |      |
|----------------|-------------------|------------------------------------------------------------------|------|------|------|
| 3 <sup>b</sup> | PhCH <sub>3</sub> | [Ir(dF(CF <sub>3</sub> )ppy) <sub>2</sub> dtbbpy]PF <sub>6</sub> | Blue | AcOH | 32   |
| 4 <sup>c</sup> | PhCH <sub>3</sub> | [Ir(dF(CF <sub>3</sub> )ppy) <sub>2</sub> dtbbpy]PF <sub>6</sub> | Blue | AcOH | n.r. |
| 5              | PhCH <sub>3</sub> | --                                                               | Blue | AcOH | n.r. |
| 6              | PhCH <sub>3</sub> | [Ir(dF(CF <sub>3</sub> )ppy) <sub>2</sub> dtbbpy]PF <sub>6</sub> | --   | AcOH | n.r. |

<sup>a</sup>Reaction conditions: **1a** (0.15 mmol, 1.0 equiv.), [Ir(dF(CF<sub>3</sub>)ppy)<sub>2</sub>dtbbpy]PF<sub>6</sub> (2 mol%), AcOH (0.3 mmol, 2.0 equiv.), PPh<sub>3</sub> (0.54 mmol, 3.6 equiv.), PhCH<sub>3</sub> (0.1 M, 1.5 mL), 30 W blue LEDs, ambient temperature, argon atmosphere, 24 hours, isolated yield. <sup>b</sup>in air; <sup>c</sup>no PPh<sub>3</sub>.

**Table S2.** Reaction condition screening<sup>a</sup>

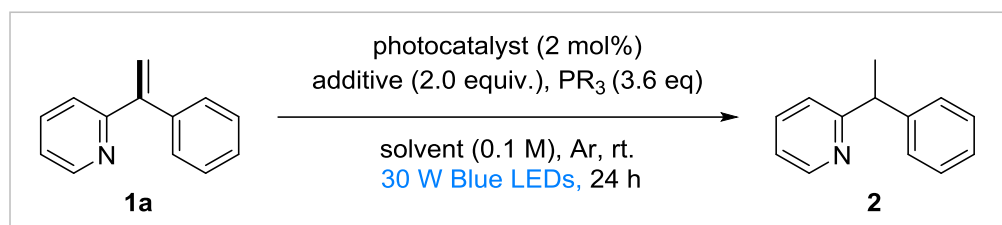

| Entry           | Solvent            | Photocatalyst                                                                       | PR <sub>3</sub>                   | Additive | Yield (%) |
|-----------------|--------------------|-------------------------------------------------------------------------------------|-----------------------------------|----------|-----------|
| 1               | PhCH <sub>3</sub>  | [Ir(dF(CF <sub>3</sub> )ppy) <sub>2</sub> dtbbpy]PF <sub>6</sub>                    | PPh <sub>3</sub>                  | HCOOH    | 72        |
| 2               | PhCH <sub>3</sub>  | [Ir(dF(CF <sub>3</sub> )ppy) <sub>2</sub> dtbbpy]PF <sub>6</sub>                    | PPh <sub>3</sub>                  | TFA      | n.d.      |
| 3               | PhCH <sub>3</sub>  | Ir(ppy) <sub>2</sub> (dtbpy)PF <sub>6</sub>                                         | PPh <sub>3</sub>                  | AcOH     | 32        |
| 4               | PhCH <sub>3</sub>  | Ir(dF(CF <sub>3</sub> )ppy) <sub>2</sub> (4,4'-dCF <sub>3</sub> bpy)PF <sub>6</sub> | PPh <sub>3</sub>                  | AcOH     | 39        |
| 5               | CH <sub>3</sub> CN | [Ir(dF(CF <sub>3</sub> )ppy) <sub>2</sub> dtbbpy]PF <sub>6</sub>                    | PPh <sub>3</sub>                  | AcOH     | 91        |
| 6               | Acetone            | [Ir(dF(CF <sub>3</sub> )ppy) <sub>2</sub> dtbbpy]PF <sub>6</sub>                    | PPh <sub>3</sub>                  | AcOH     | 89        |
| 7               | MeOH               | [Ir(dF(CF <sub>3</sub> )ppy) <sub>2</sub> dtbbpy]PF <sub>6</sub>                    | PPh <sub>3</sub>                  | AcOH     | 81        |
| 8               | DMF                | [Ir(dF(CF <sub>3</sub> )ppy) <sub>2</sub> dtbbpy]PF <sub>6</sub>                    | PPh <sub>3</sub>                  | AcOH     | 95        |
| 9               | DCE                | [Ir(dF(CF <sub>3</sub> )ppy) <sub>2</sub> dtbbpy]PF <sub>6</sub>                    | PPh <sub>3</sub>                  | AcOH     | 87        |
| 10              | THF                | [Ir(dF(CF <sub>3</sub> )ppy) <sub>2</sub> dtbbpy]PF <sub>6</sub>                    | PPh <sub>3</sub>                  | AcOH     | 46        |
| 11              | PhCH <sub>3</sub>  | [Ir(dF(CF <sub>3</sub> )ppy) <sub>2</sub> dtbbpy]PF <sub>6</sub>                    | <i>n</i> -PBu <sub>3</sub>        | AcOH     | n.d.      |
| 12              | PhCH <sub>3</sub>  | [Ir(dF(CF <sub>3</sub> )ppy) <sub>2</sub> dtbbpy]PF <sub>6</sub>                    | MePh <sub>2</sub> P               | AcOH     | 94        |
| 13              | PhCH <sub>3</sub>  | [Ir(dF(CF <sub>3</sub> )ppy) <sub>2</sub> dtbbpy]PF <sub>6</sub>                    | ( <i>p</i> -OMePh) <sub>3</sub> P | AcOH     | 82        |
| 14              | PhCH <sub>3</sub>  | [Ir(dF(CF <sub>3</sub> )ppy) <sub>2</sub> dtbbpy]PF <sub>6</sub>                    | ( <i>p</i> -FPh) <sub>3</sub> P   | AcOH     | n.r.      |
| 15 <sup>b</sup> | PhCH <sub>3</sub>  | [Ir(dF(CF <sub>3</sub> )ppy) <sub>2</sub> dtbbpy]PF <sub>6</sub>                    | PPh <sub>3</sub>                  | AcOH     | 89        |
| 16 <sup>c</sup> | PhCH <sub>3</sub>  | [Ir(dF(CF <sub>3</sub> )ppy) <sub>2</sub> dtbbpy]PF <sub>6</sub>                    | PPh <sub>3</sub>                  | AcOH     | trace     |
| 17 <sup>d</sup> | PhCH <sub>3</sub>  | [Ir(dF(CF <sub>3</sub> )ppy) <sub>2</sub> dtbbpy]PF <sub>6</sub>                    | PPh <sub>3</sub>                  | AcOH     | 51        |
| 18 <sup>e</sup> | PhCH <sub>3</sub>  | [Ir(dF(CF <sub>3</sub> )ppy) <sub>2</sub> dtbbpy]PF <sub>6</sub>                    | PPh <sub>3</sub>                  | AcOH     | 61        |

<sup>a</sup>Reaction conditions: **1a** (0.15 mmol, 1.0 equiv.), photocatalyst (2 mol%), additive (0.3 mmol, 2.0 equiv.), PR<sub>3</sub> (0.54 mmol, 3.6 equiv.), solvent (0.1 M, 1.5 mL), 30 W blue LEDs, ambient temperature, argon atmosphere, 24 hours, isolated yield. <sup>b</sup>3.0 equiv. of PPh<sub>3</sub>. <sup>c</sup>0.5 equiv. AcOH was used. <sup>d</sup>1.0 equiv. AcOH was used. <sup>e</sup>1.5 equiv. AcOH was used. TFA = Triflic acid



**Table S3.** Investigation of light source and water amount in the system<sup>a</sup>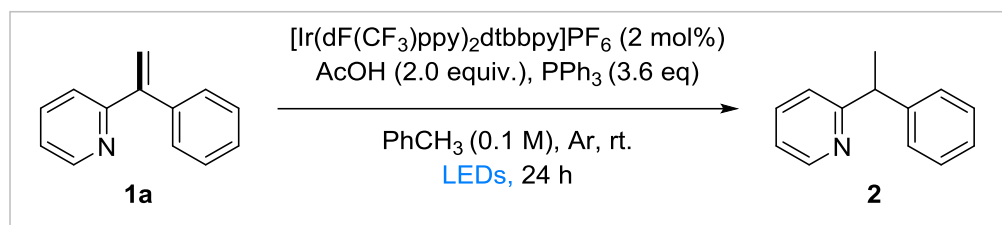

| Entry          | Solvent           | Photocatalyst                                                    | LEDs        | Yield (%) |
|----------------|-------------------|------------------------------------------------------------------|-------------|-----------|
| 1              | PhCH <sub>3</sub> | [Ir(dF(CF <sub>3</sub> )ppy) <sub>2</sub> dtbbpy]PF <sub>6</sub> | White LEDs  | 89        |
| 2              | PhCH <sub>3</sub> | [Ir(dF(CF <sub>3</sub> )ppy) <sub>2</sub> dtbbpy]PF <sub>6</sub> | Purple LEDs | 86        |
| 3              | PhCH <sub>3</sub> | [Ir(dF(CF <sub>3</sub> )ppy) <sub>2</sub> dtbbpy]PF <sub>6</sub> | Green LEDs  | n.r       |
| 4 <sup>b</sup> | PhCH <sub>3</sub> | [Ir(dF(CF <sub>3</sub> )ppy) <sub>2</sub> dtbbpy]PF <sub>6</sub> | Blue LEDs   | 76        |
| 5 <sup>c</sup> | PhCH <sub>3</sub> | [Ir(dF(CF <sub>3</sub> )ppy) <sub>2</sub> dtbbpy]PF <sub>6</sub> | Blue LEDs   | 97        |
| 6 <sup>d</sup> | PhCH <sub>3</sub> | [Ir(dF(CF <sub>3</sub> )ppy) <sub>2</sub> dtbbpy]PF <sub>6</sub> | Blue LEDs   | 95        |
| 7 <sup>e</sup> | PhCH <sub>3</sub> | [Ir(dF(CF <sub>3</sub> )ppy) <sub>2</sub> dtbbpy]PF <sub>6</sub> | Blue LEDs   | 74        |

<sup>a</sup>Standard conditions: **1a** (0.15 mmol, 1.0 equiv.), [Ir(dF(CF<sub>3</sub>)ppy)<sub>2</sub>dtbbpy]PF<sub>6</sub> (2 mol%), AcOH (0.3 mmol, 2.0 equiv.), PPh<sub>3</sub> (0.54 mmol, 3.6 equiv.), PhCH<sub>3</sub> (0.1 M, 1.5 mL), LEDs, ambient temperature, argon atmosphere, 24 hours, isolated yield. <sup>b</sup>dry PhCH<sub>3</sub> was used, 4 Å Ms (40 mg); <sup>c</sup>dry PhCH<sub>3</sub> was used. <sup>d</sup>20 equiv H<sub>2</sub>O was added. <sup>e</sup>V(PhCH<sub>3</sub>):V(H<sub>2</sub>O) = 9:1.

**Table S4.** Optimization of reaction conditions for hydrogenation of substrate **1a'**<sup>a</sup>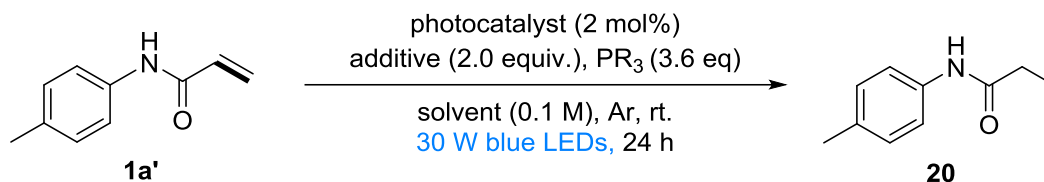

| Entry    | Solvent                 | Photocatalyst                                                      | PR <sub>3</sub>        | Additive                             | Yield (%) |
|----------|-------------------------|--------------------------------------------------------------------|------------------------|--------------------------------------|-----------|
| 1        | PhCH <sub>3</sub>       | [Ir(dF(CF <sub>3</sub> )ppy) <sub>2</sub> dtbbpy]PF <sub>6</sub>   | PPh <sub>3</sub>       | AcOH                                 | 13        |
| 2        | Acetone                 | [Ir(dF(CF <sub>3</sub> )ppy) <sub>2</sub> dtbbpy]PF <sub>6</sub>   | PPh <sub>3</sub>       | AcOH                                 | 25        |
| 3        | MeOH                    | [Ir(dF(CF <sub>3</sub> )ppy) <sub>2</sub> dtbbpy]PF <sub>6</sub>   | PPh <sub>3</sub>       | AcOH                                 | trace     |
| 4        | DMF                     | [Ir(dF(CF <sub>3</sub> )ppy) <sub>2</sub> dtbbpy]PF <sub>6</sub>   | PPh <sub>3</sub>       | AcOH                                 | n.r.      |
| 5        | DMSO                    | [Ir(dF(CF <sub>3</sub> )ppy) <sub>2</sub> dtbbpy]PF <sub>6</sub>   | PPh <sub>3</sub>       | AcOH                                 | n.d.      |
| 6        | THF                     | [Ir(dF(CF <sub>3</sub> )ppy) <sub>2</sub> dtbbpy]PF <sub>6</sub>   | PPh <sub>3</sub>       | AcOH                                 | n.r.      |
| 7        | DCE                     | [Ir(dF(CF <sub>3</sub> )ppy) <sub>2</sub> dtbbpy]PF <sub>6</sub>   | PPh <sub>3</sub>       | AcOH                                 | trace     |
| <b>8</b> | <b>CH<sub>3</sub>CN</b> | <b>[Ir(dF(CF<sub>3</sub>)ppy)<sub>2</sub>dtbbpy]PF<sub>6</sub></b> | <b>PPh<sub>3</sub></b> | <b>AcOH</b>                          | <b>49</b> |
| 9        | CH <sub>3</sub> CN      | [Ir(dF(CF <sub>3</sub> )ppy) <sub>2</sub> dtbbpy]PF <sub>6</sub>   | PPh <sub>3</sub>       | PhCOOH                               | n.d.      |
| 10       | CH <sub>3</sub> CN      | [Ir(dF(CF <sub>3</sub> )ppy) <sub>2</sub> dtbbpy]PF <sub>6</sub>   | PPh <sub>3</sub>       | (PhO) <sub>2</sub> PO <sub>2</sub> H | 33        |
| 11       | CH <sub>3</sub> CN      | [Ir(dF(CF <sub>3</sub> )ppy) <sub>2</sub> dtbbpy]PF <sub>6</sub>   | PPh <sub>3</sub>       | HCOOH                                | 37        |

|                 |                    |                                                                                     |                                   |                                   |       |
|-----------------|--------------------|-------------------------------------------------------------------------------------|-----------------------------------|-----------------------------------|-------|
| 12              | CH <sub>3</sub> CN | [Ir(dF(CF <sub>3</sub> )ppy) <sub>2</sub> dtbbpy]PF <sub>6</sub>                    | PPh <sub>3</sub>                  | CF <sub>3</sub> SO <sub>3</sub> H | trace |
| 13              | CH <sub>3</sub> CN | [Ir(dF(CF <sub>3</sub> )ppy) <sub>2</sub> dtbbpy]PF <sub>6</sub>                    | PPh <sub>3</sub>                  | CF <sub>3</sub> COOH              | trace |
| 14              | CH <sub>3</sub> CN | [Ir(dF(CF <sub>3</sub> )ppy) <sub>2</sub> dtbbpy]PF <sub>6</sub>                    | PPh <sub>3</sub>                  | NH <sub>4</sub> Cl                | n.r.  |
| 15              | CH <sub>3</sub> CN | [Ir(dF(CF <sub>3</sub> )ppy) <sub>2</sub> dtbbpy]PF <sub>6</sub>                    | PPh <sub>3</sub>                  | K <sub>2</sub> CO <sub>3</sub>    | n.r.  |
| 16              | CH <sub>3</sub> CN | <i>fac</i> -Ir(ppy) <sub>3</sub>                                                    | PPh <sub>3</sub>                  | AcOH                              | trace |
| 17              | CH <sub>3</sub> CN | 4-CZIPN                                                                             | PPh <sub>3</sub>                  | AcOH                              | n.d.  |
| 18              | CH <sub>3</sub> CN | MesAcr <sup>+</sup> ClO <sub>4</sub> <sup>-</sup>                                   | PPh <sub>3</sub>                  | AcOH                              | n.r.  |
| 19              | CH <sub>3</sub> CN | Ru(bpy) <sub>3</sub> PF <sub>6</sub>                                                | PPh <sub>3</sub>                  | AcOH                              | n.r.  |
| 20              | CH <sub>3</sub> CN | Rhodamin B                                                                          | PPh <sub>3</sub>                  | AcOH                              | n.r.  |
| 21              | CH <sub>3</sub> CN | Ir(ppy) <sub>2</sub> (dtbpy)PF <sub>6</sub>                                         | PPh <sub>3</sub>                  | AcOH                              | 25    |
| 22              | CH <sub>3</sub> CN | Ir(dF(CF <sub>3</sub> )ppy) <sub>2</sub> (4,4'-dCF <sub>3</sub> bpy)PF <sub>6</sub> | PPh <sub>3</sub>                  | AcOH                              | trace |
| 23              | CH <sub>3</sub> CN | [Ir(dF(CF <sub>3</sub> )ppy) <sub>2</sub> dtbbpy]PF <sub>6</sub>                    | <i>n</i> -Bu <sub>3</sub>         | AcOH                              | trace |
| 24              | CH <sub>3</sub> CN | [Ir(dF(CF <sub>3</sub> )ppy) <sub>2</sub> dtbbpy]PF <sub>6</sub>                    | MePh <sub>2</sub> P               | AcOH                              | 37    |
| 25              | CH <sub>3</sub> CN | [Ir(dF(CF <sub>3</sub> )ppy) <sub>2</sub> dtbbpy]PF <sub>6</sub>                    | ( <i>p</i> -OMePh) <sub>3</sub> P | AcOH                              | 33    |
| 26              | CH <sub>3</sub> CN | [Ir(dF(CF <sub>3</sub> )ppy) <sub>2</sub> dtbbpy]PF <sub>6</sub>                    | ( <i>p</i> -FPh) <sub>3</sub> P   | AcOH                              | 41    |
| 27 <sup>b</sup> | CH <sub>3</sub> CN | [Ir(dF(CF <sub>3</sub> )ppy) <sub>2</sub> dtbbpy]PF <sub>6</sub>                    | PPh <sub>3</sub>                  | AcOH                              | 25    |
| 28              | CH <sub>3</sub> CN | --                                                                                  | PPh <sub>3</sub>                  | AcOH                              | n.r.  |
| 29              | CH <sub>3</sub> CN | [Ir(dF(CF <sub>3</sub> )ppy) <sub>2</sub> dtbbpy]PF <sub>6</sub>                    | --                                | AcOH                              | n.r.  |
| 30              | CH <sub>3</sub> CN | [Ir(dF(CF <sub>3</sub> )ppy) <sub>2</sub> dtbbpy]PF <sub>6</sub>                    | PPh <sub>3</sub>                  | --                                | trace |
| 31 <sup>c</sup> | CH <sub>3</sub> CN | [Ir(dF(CF <sub>3</sub> )ppy) <sub>2</sub> dtbbpy]PF <sub>6</sub>                    | PPh <sub>3</sub>                  | AcOH                              | n.r.  |

<sup>a</sup>Reaction conditions: **1a**<sup>a</sup> (0.15 mmol, 1.0 equiv.), photocatalyst (2 mol%), Additive (0.3 mmol, 2.0 equiv.), PR<sub>3</sub> (0.54 mmol, 3.6 equiv.), solvent (0.1 M, 1.5 mL), 30 W blue LEDs, ambient temperature, argon atmosphere, 24 hours, isolated yield. <sup>b</sup>in air; <sup>c</sup>in dark.

### 3.3 General procedure for the hydrogenation reactions of alkenes

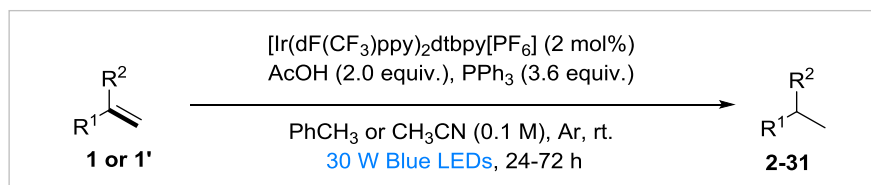

**Standard conditions:** alkene **1** or **1'** (0.15 mmol, 1.0 equiv.), [Ir(dF(CF<sub>3</sub>)ppy)<sub>2</sub>dtbpy][PF<sub>6</sub>] (**PC1**, 2 mol%), PPh<sub>3</sub> (0.54 mmol, 3.6 equiv.), AcOH (0.30 mmol, 2.0 equiv.), PhCH<sub>3</sub> or CH<sub>3</sub>CN (0.1 M, 1.5 mL), 30 W blue LEDs, ambient temperature, argon atmosphere, 24-72 h, isolated yield.

To an oven-dried 20 mL quartz flask equipped with a magnetic stirring bar was added alkene **1** or **1'** (0.15 mmol, 1.0 equiv.), AcOH (0.3 mmol, 2.0 equiv.), PPh<sub>3</sub> (0.54 mmol, 3.6 equiv.), PhCH<sub>3</sub> or CH<sub>3</sub>CN (1.5 mL, 0.1 M) and [Ir(dFCF<sub>3</sub>ppy)<sub>2</sub>dtbbpy]PF<sub>6</sub> (**PC1**, 2 mol%). The reaction tube was

evacuated and backfilled with Ar three times before light irradiation. After consumption of alkene (monitored by TLC), the reaction mixture was stirred at ambient temperature (*note: the reaction temperature ranges from 25 °C to 40 °C*) under irradiation of 30 W blue LEDs (distance app. 3 cm) for specific time. After completion (monitored by TLC), the solvent was removed under reduced pressure, and then the resulting residue was purified by flash chromatography on silica gel with a mixture of ethyl acetate and petroleum ether (1:9 to 1:4) as the eluent to afford the desired products **2-31**.

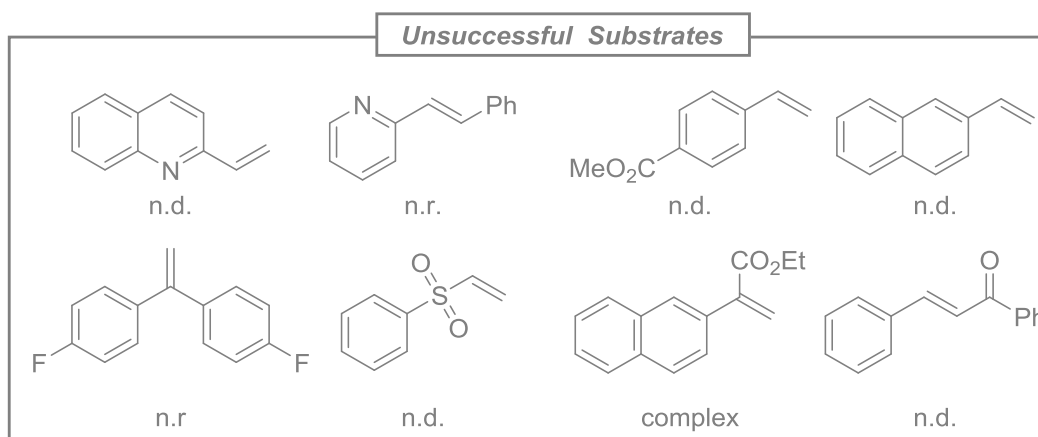

### 3.4 Scale-up reaction (Figure S2)

#### Scale-up reaction for the preparation of hydrogenated product **2** (Figure S2)

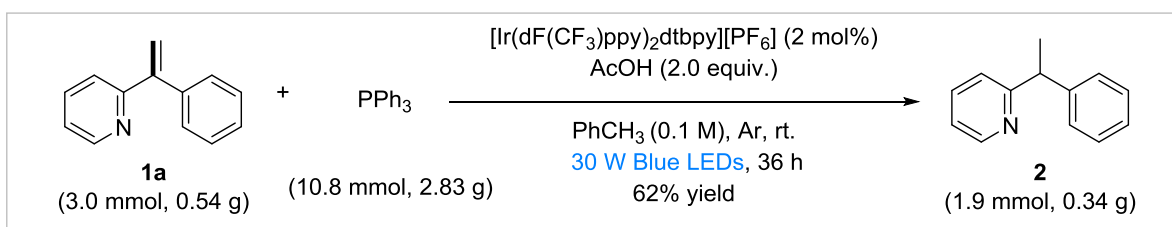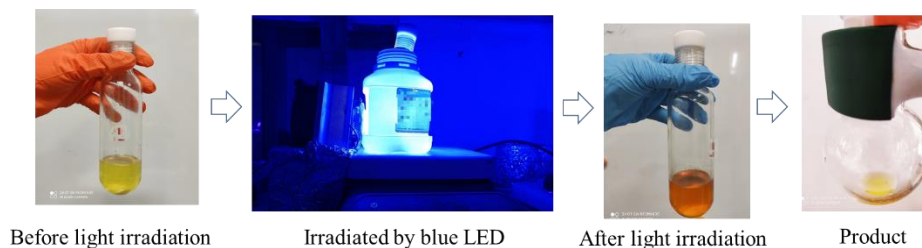

**Figure S2.** Process of scale-up reaction for the synthesis of **2** (Photographed by Zhen-Zhen Xie)

To an oven-dried 120 mL schlenk flask equipped with a magnetic stirring bar was charged with 2-(1-phenylvinyl)pyridine **1a** (3.0 mmol, 1.0 equiv.), AcOH (6.0 mmol, 2.0 equiv.) and  $\text{PhCH}_3$  (30

---

mL, 0.1 M). Then, PPh<sub>3</sub> (10.8 mmol, 3.6 equiv.) and [Ir(dFCF<sub>3</sub>ppy)<sub>2</sub>dtbbpy]PF<sub>6</sub> (**PC1**, 2 mol%) were added. The vessel was evacuated and backfilled with Ar three times before light irradiation. After that, the tube was stirred at ambient temperature (*note: the reaction temperature ranges from 25 °C to 40 °C*) under irradiation of 30 W blue LEDs for 36 h. The solvent was removed under reduced pressure, and then the resulting residue was purified by flash chromatography on silica gel with a mixture of ethyl acetate and petroleum ether (PE/EA=9:1) as the eluent to afford the desired product **2** in 62% yield.

## 4. Mechanistic Studies

### Emission Quenching Experiments (Stern-Volmer Studies) (Figure S3)

All fluorescence measurements were recorded using a Hitachi FL-7000 Fluorometer. Quenching studies were conducted in PhCH<sub>3</sub>. All [Ir(dF(CF<sub>3</sub>)ppy)<sub>2</sub>dtbpy][PF<sub>6</sub>] solutions (concentration of 5 μM) were excited at 312 nm and the emission intensity was collected at 478 nm (Figure S3). Measurements using corresponding quenchers were taken in triplicate at different concentrations.

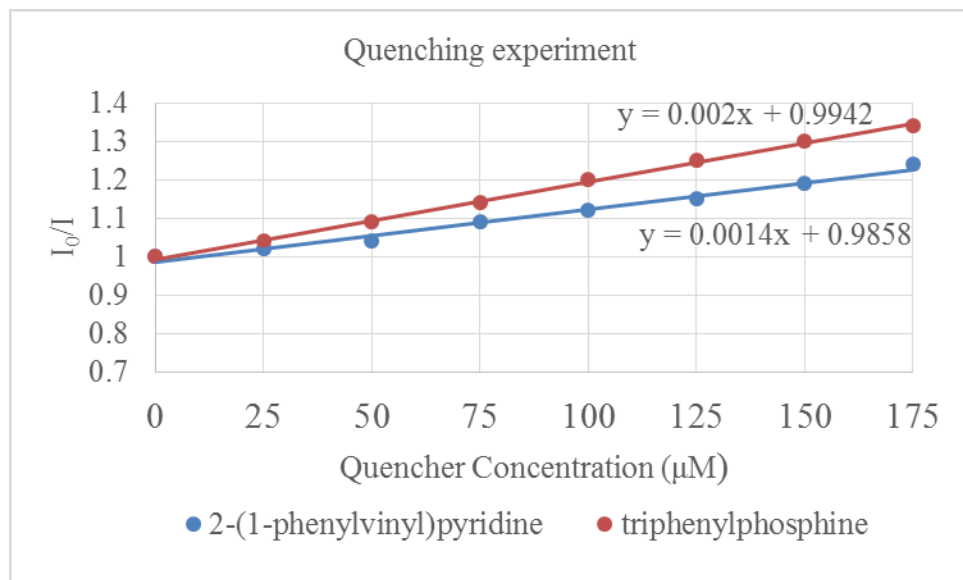

**Figure S3.** Stern-Volmer experiments of PPh<sub>3</sub> and vinylpyridine **1a** in PhCH<sub>3</sub>

### Trapping Experiments

#### *a) Trapping experiment with PBN for hydrogenation reaction of alkene (Figure S4 – S5)*

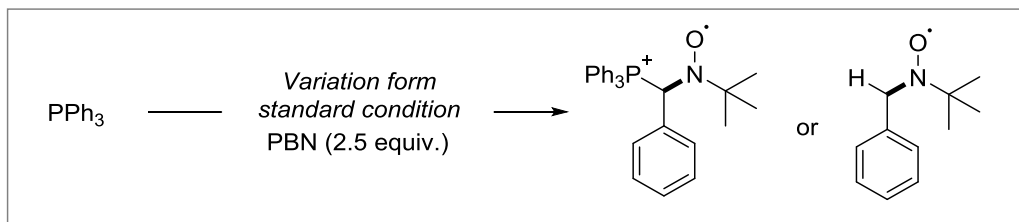

Trapping experiment was designed according to the following conditions: To an oven-dried 20 mL quartz flask equipped with a magnetic stirring bar, AcOH (0.30 mmol, 2.0 equiv.), PhCH<sub>3</sub> (1.5 mL, 0.1 M), PPh<sub>3</sub> (0.54 mmol, 3.6 equiv.), [Ir(dF(CF<sub>3</sub>)ppy)<sub>2</sub>dtbbpy]PF<sub>6</sub> (**PC1**, 2 mol%) and *N*-tert-butyl- $\alpha$ -phenylnitron (PBN, 0.375 mmol, 2.5 equiv.) were added in sequence. The reaction tube was evacuated and backfilled with Ar three times before light irradiation. The reaction mixture was stirred at ambient temperature under irradiation of 30 W blue LEDs (distance app. 3 cm) for

24 h. After that, the reaction mixture was analyzed by HRMS (Figure S4). The corresponding PBN-trapping products were supported by HRMS. HRMS (EI):  $C_{29}H_{30}NOP^+ [M]^+$  calcd: 439.2060, found: 439.2076;  $C_{11}H_{16}NO [M]^+$  calcd: 178.1232, found: 178.1251.

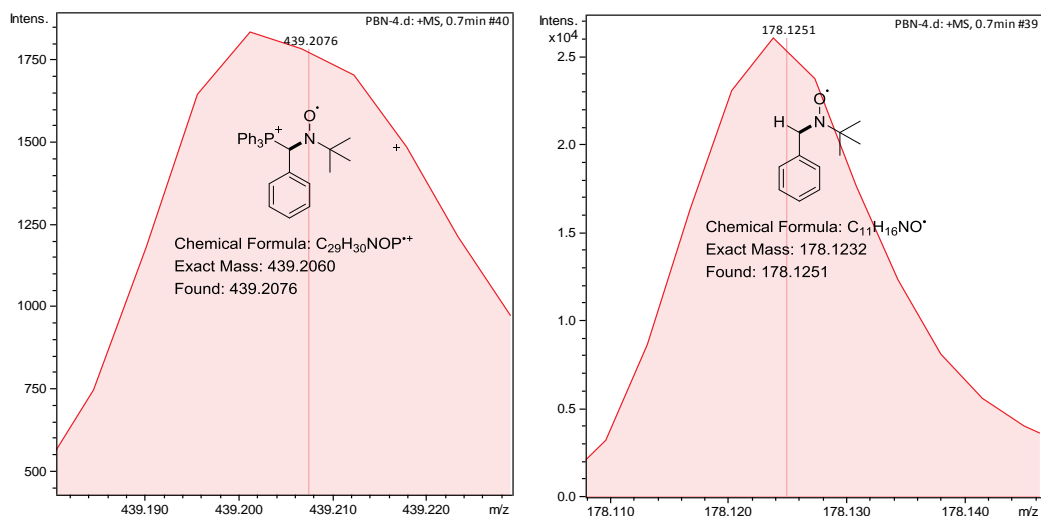

**Figure S4.** Crude ESI-MS of the PBN-trapping adducts for hydrogenation reaction

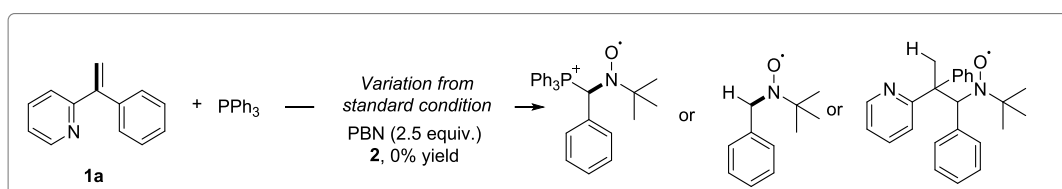

Another Trapping experiment was also designed according to the following conditions: To an oven-dried 20 mL quartz flask equipped with a magnetic stirring bar, **1a** (0.15 mmol, 1.0 equiv.), AcOH (0.30 mmol, 2.0 equiv.),  $PhCH_3$  (1.5 mL, 0.1 M),  $PPh_3$  (0.54 mmol, 3.6 equiv.),  $[Ir(dF(CF_3)ppy)_2dtbbpy]PF_6$  (**PC1**, 2 mol%) and PBN (0.375 mmol, 2.5 equiv.) were added in sequence. The reaction tube was evacuated and backfilled with Ar three times before light irradiation. The reaction mixture was stirred at ambient temperature under irradiation of 30 W blue LEDs (distance app. 3 cm) for 24 h. And no product **2** was detected when PBN was employed as radical scavenger, indicating that the reaction was completely inhibited. After, the reaction mixture was analyzed by HRMS (Figure S5). The corresponding PBN-trapping products were supported by HRMS. HRMS (EI):  $C_{29}H_{30}NOP^+ [M]^+$  calcd: 439.2060, found: 439.2077;  $C_{11}H_{16}NO [M]^+$  calcd: 178.1232, found: 178.1253;  $C_{24}H_{27}N_2NaO^+ [M+Na]^+$  calcd: 382.2016, found: 382.2025.

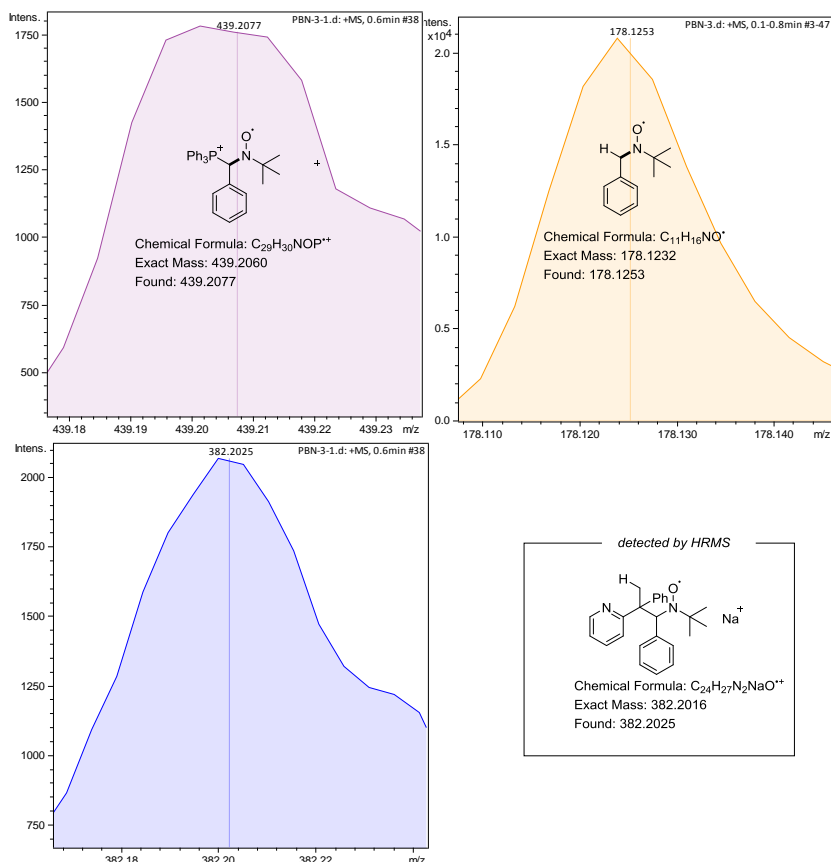

**Figure S5.** Crude ESI-MS of the PBN-trapping adducts for hydrogenation reaction

**b) Trapping experiment with TEMPO and BHT for hydrogenation reactions of alkene (Figure S6 – S7)**

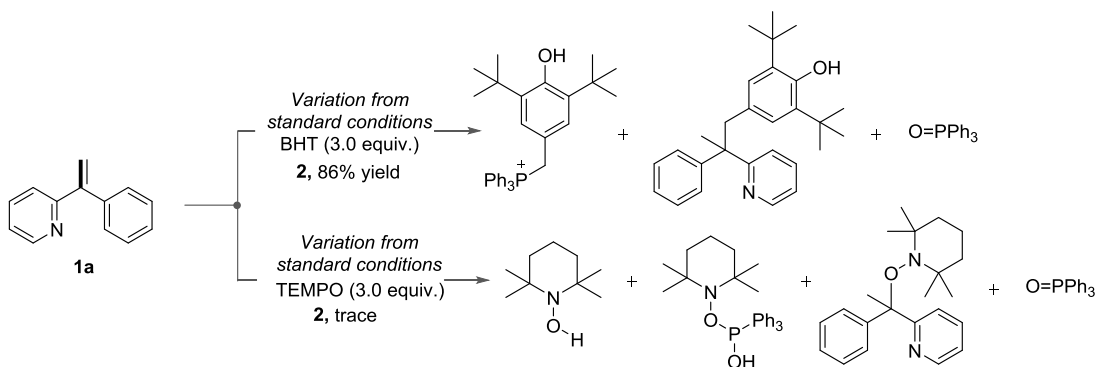

Radical trapping experiments for the olefin reduction reaction were conducted under standard conditions with two trapping agents (BHT and TEMPO) to catch the putative radical. The desired product **2** was obtained in 86% yield when BHT was added, and trace product **2** was detected when TEMPO was employed as radical scavenger, indicating that the reaction was completely inhibited. ESI-MS analysis of the crude reaction mixture was performed, and the corresponding radical

trapped product was successfully detected by HRMS in the presence of BHT (Figure S6). HRMS (EI):  $C_{33}H_{38}OP^+$ ,  $[M]^+$  calcd: 481.2656, found: 481.2654;  $C_{28}H_{35}NNaO^+$   $[M+Na]^+$  calcd: 424.2611, found: 424.2599;  $C_{18}H_{16}OP^+$   $[M+H]^+$  calcd: 279.0933, found: 279.0952 (BHT-adduct). Notably, the corresponding coupled product between TEMPO radical and the expected radical was successfully detected by HRMS (Figure S7). HRMS (EI):  $C_9H_{20}NO^+$ ,  $[M+H]^+$  calcd: 158.1539, found: 158.1550;  $C_{22}H_{31}N_2O^+$   $[M+H]^+$  calcd: 339.2431, found: 339.2450;  $C_{27}H_{35}NO_2P^+$   $[M+H]^+$  calcd: 436.2400, found: 436.2421;  $C_{18}H_{16}OP^+$   $[M+H]^+$  calcd: 279.0933, found: 279.0949 (TEMPO-adduct).

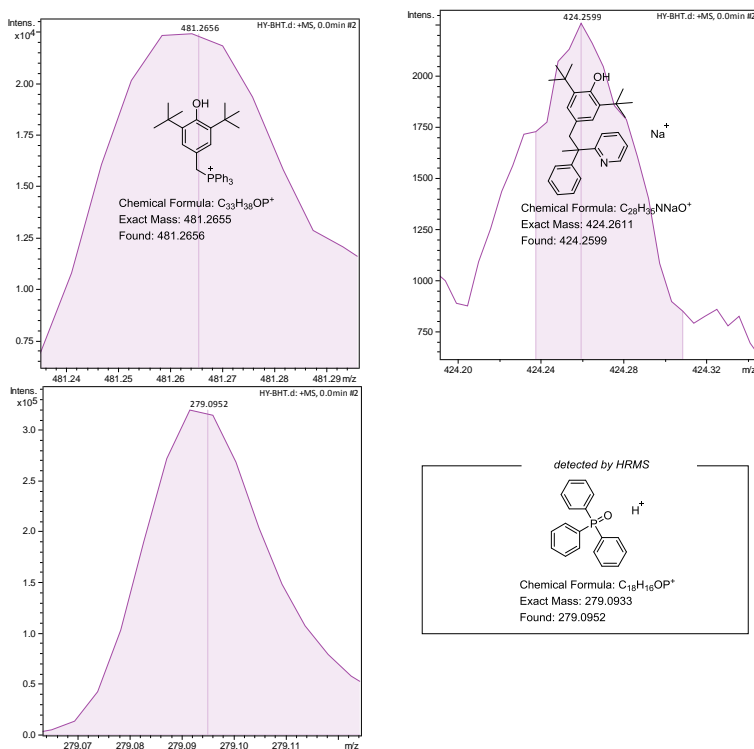

**Figure S6** Crude ESI-MS of the BHT-trapping adducts for hydrogenation reaction



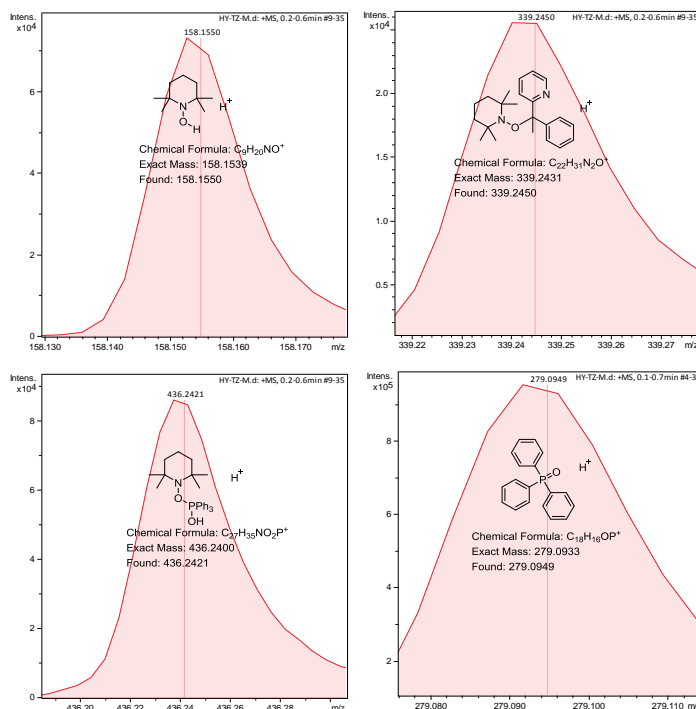

**Figure S7** Crude ESI-MS of the TEMPO-trapping adducts for hydrogenation reaction

## Labelling Experiments

### a) Deuterium Labelling Experiments for hydrogenation reaction (Figure S8-Figure-S17)

A series of labelling experiments for olefin reduction transformation reaction were performed under standard condition by using  $D_2O$  or  $AcOH/CD_3CO_2D$  as deuterium reagent. The resulting mixture was purified by flash chromatography to afford the corresponding pure product. Further, the deuterated ratio of the desired products were analyzed by  $^1H$  NMR, and these results were depicted in Table S5. As detected by  $^1H$  NMR and HRMS, deuterated product **2** was observed (Figure S8-Figure-S17)

**Table S5** Labelling Experiments for the hydrogenation reaction<sup>a</sup>

| Entry | Acid        | $D_2O$     | Yield (%) | $d$ -ratio ( $\alpha$ , %) <sup>b</sup> | $\beta$ -ratio ( $\beta$ , %) <sup>b</sup> |
|-------|-------------|------------|-----------|-----------------------------------------|--------------------------------------------|
| 1     | AcOH        | 100 equiv. | 98        | 82                                      | 220                                        |
| 2     | AcOD        | 100 equiv. | 95        | 82                                      | 212                                        |
| 3     | AcOD        | --         | 89        | 19                                      | 52                                         |
| 4     | $CD_3CO_2D$ | 100 equiv. | 89        | 83                                      | 221                                        |
| 5     | $CD_3CO_2D$ | --         | 80        | 15                                      | 38                                         |

<sup>a</sup>Reaction conditions: **1a** (0.15 mmol, 1.0 equiv.), PPh<sub>3</sub> (0.54 mmol, 3.6 equiv.), [Ir(dF(CF<sub>3</sub>)ppy)<sub>2</sub>dtbbpy]PF<sub>6</sub> (2 mmol%), AcOH/ACOD/CD<sub>3</sub>CO<sub>2</sub>D (0.30 mmol, 2.0 equiv.), PhCH<sub>3</sub> (0.1 M, 1.5 mL), 30 W blue LEDs, ambient temperature (25 ~ 40 °C), argon atmosphere, 24 hours, isolated yield. <sup>b</sup>The deuterated ratio was determined by <sup>1</sup>H NMR analysis.

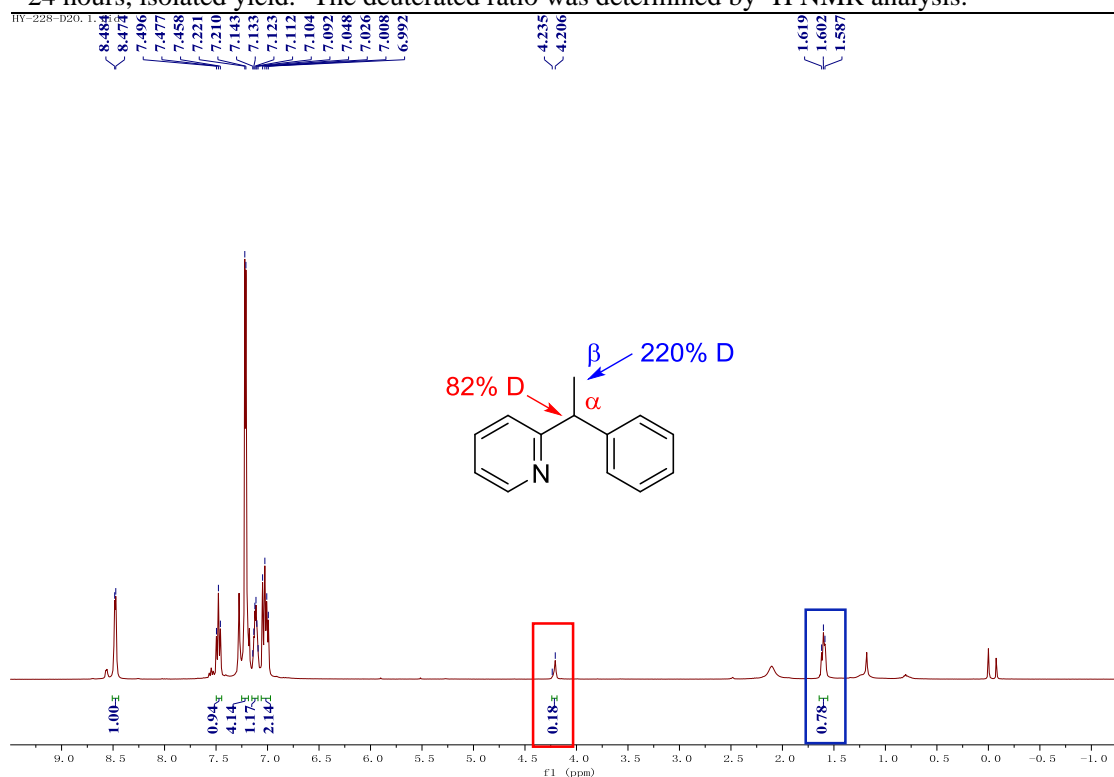

**Figure S8.** <sup>1</sup>H NMR of deuterated product **2** (2.0 equiv. AcOH and 100 equiv. D<sub>2</sub>O)

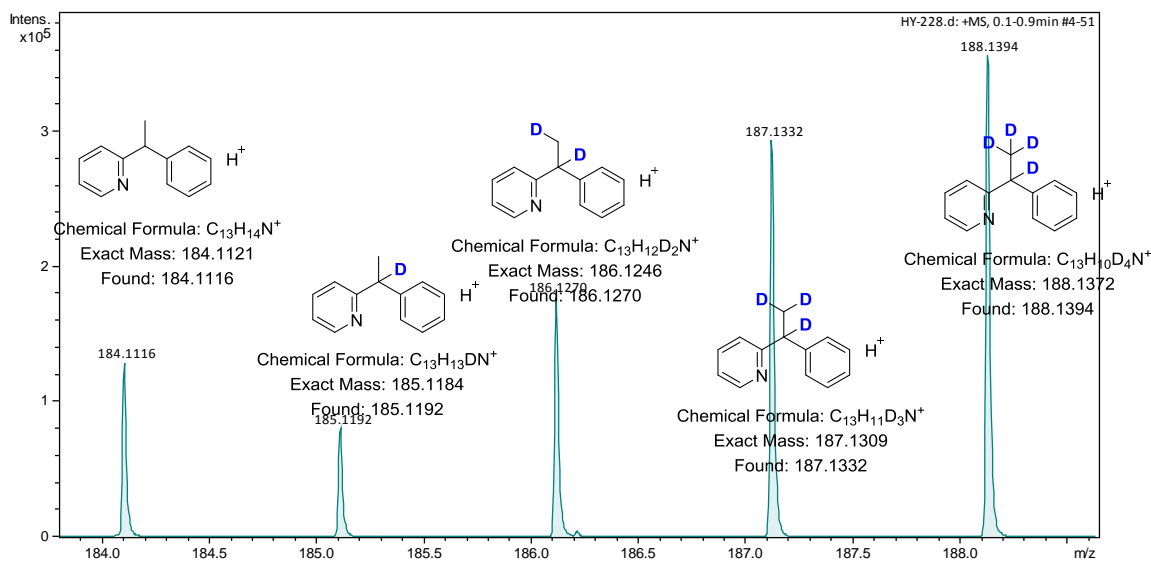

**Figure 9.** HRMS of deuterated product **2** (2.0 equiv. AcOH and 100 equiv. D<sub>2</sub>O)

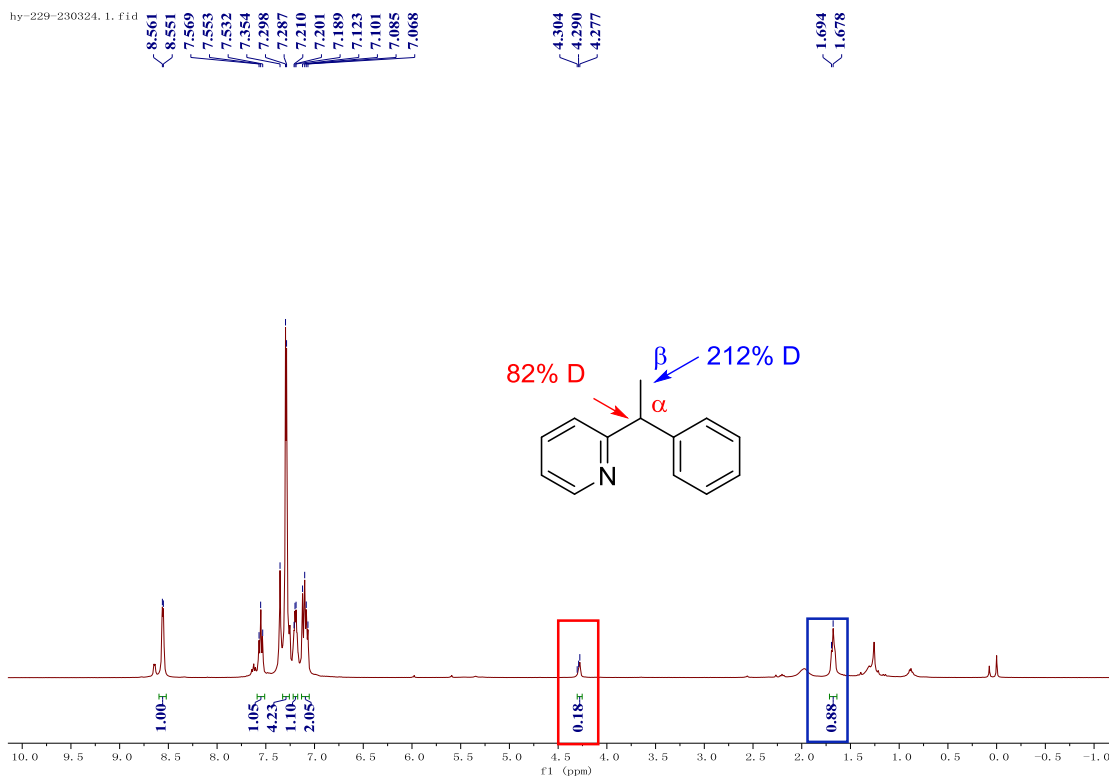

**Figure S10.**  $^1\text{H}$  NMR of deuterated product **2** (2.0 equiv. AcOD and 100 equiv.  $\text{D}_2\text{O}$ )

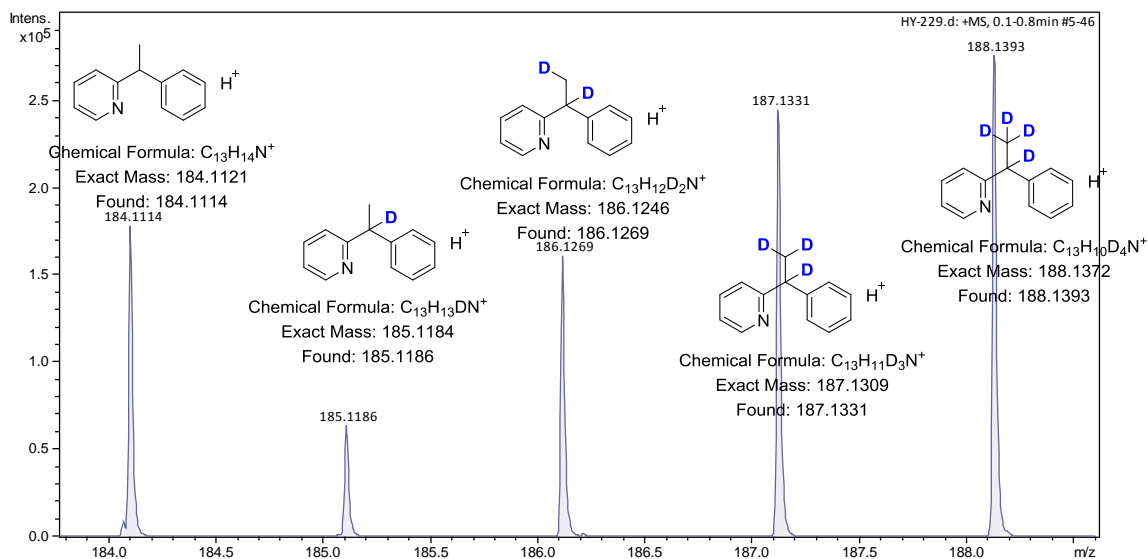

**Figure 11.** HRMS of deuterated product **2** (2.0 equiv. AcOD and 100 equiv.  $\text{D}_2\text{O}$ )

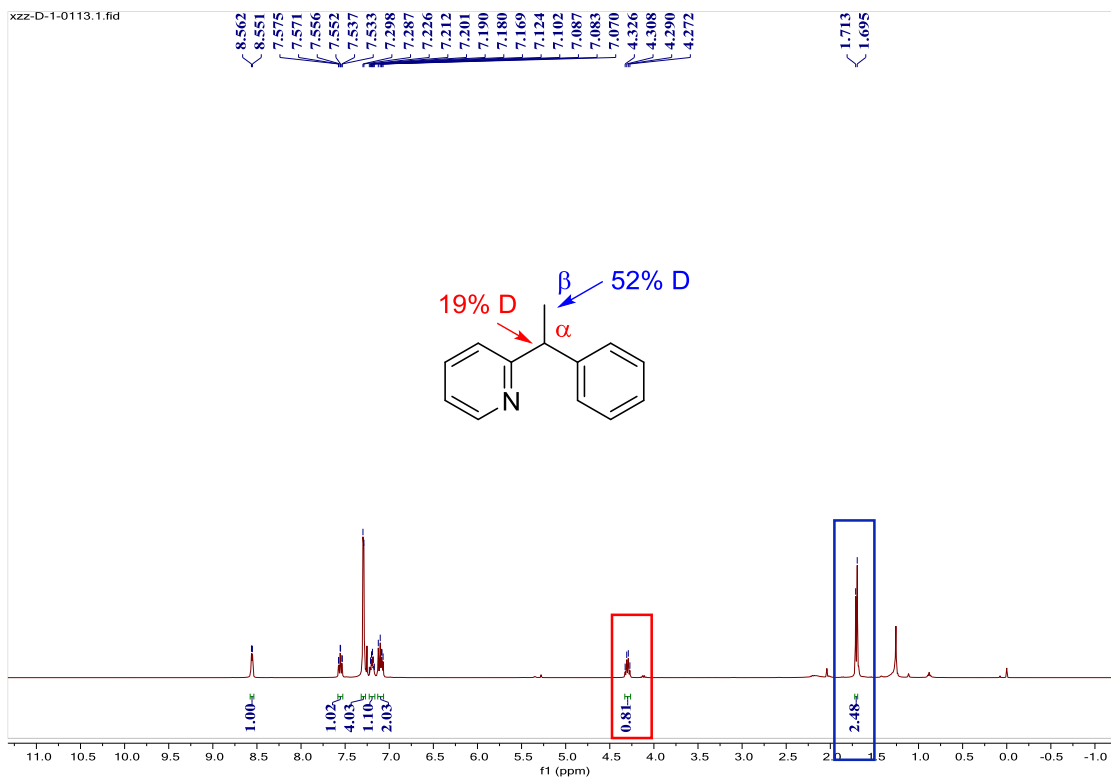

Figure S12.  $^1\text{H}$  NMR of deuterated product 2 (2.0 equiv. AcOD)

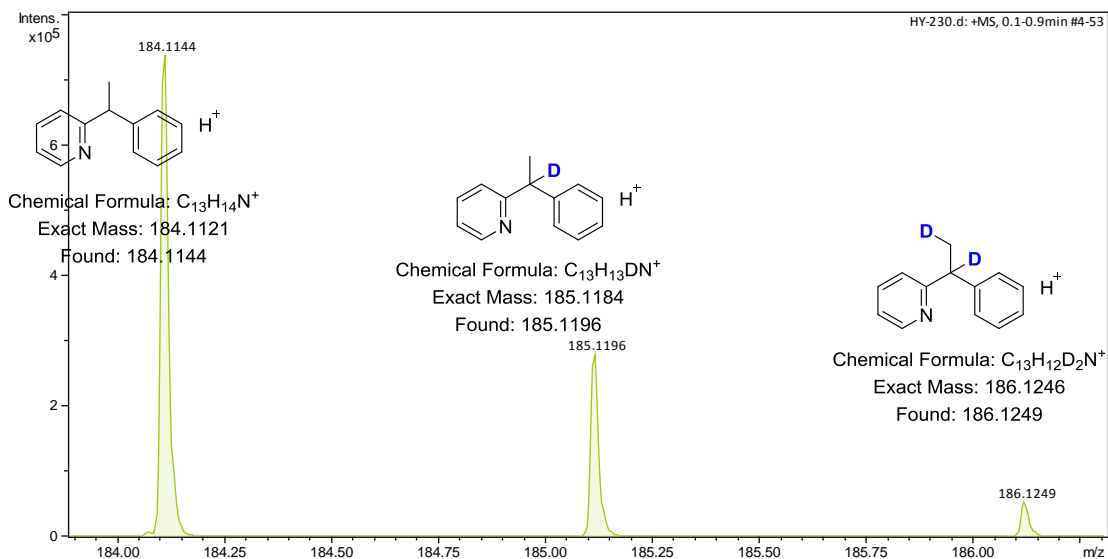

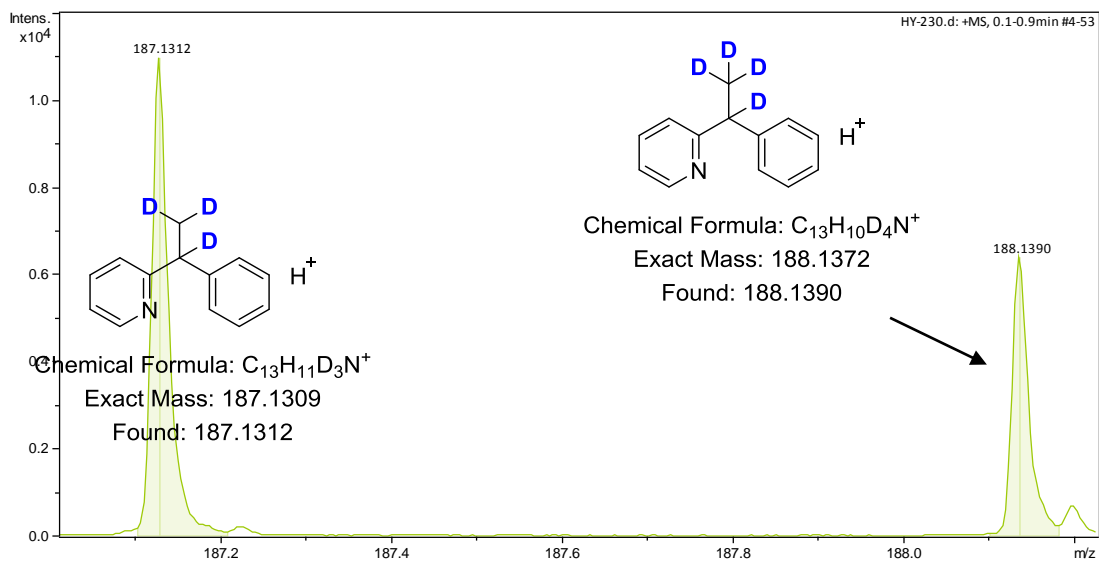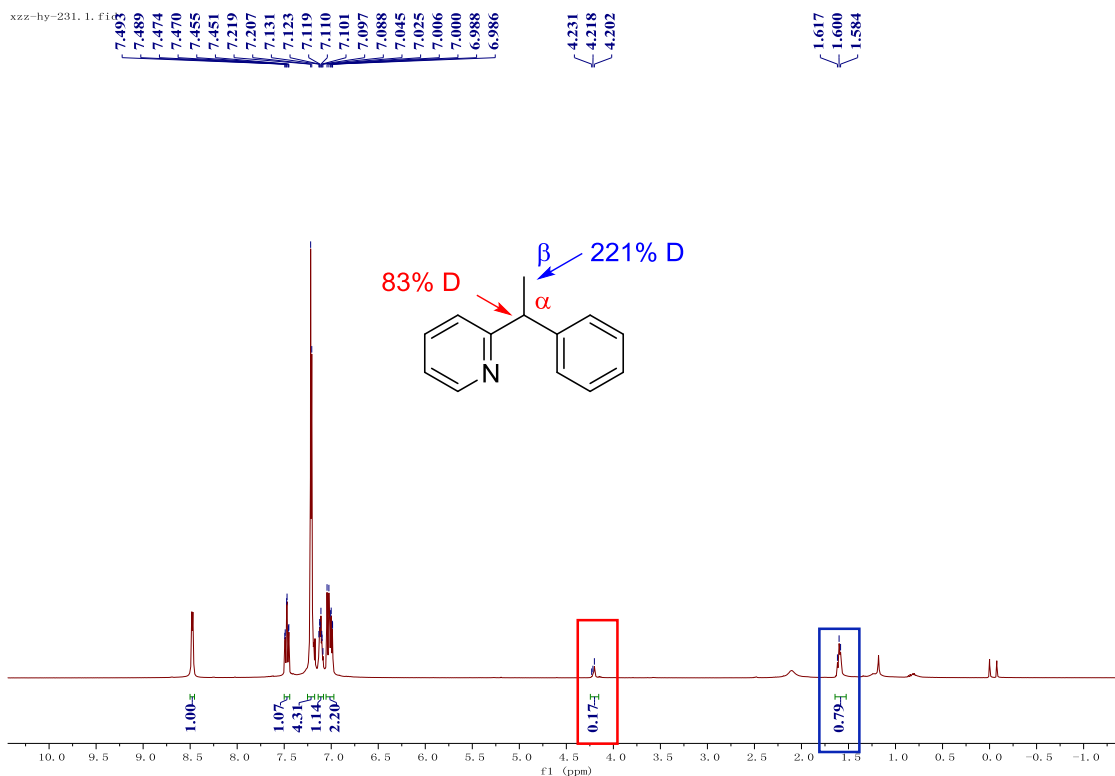

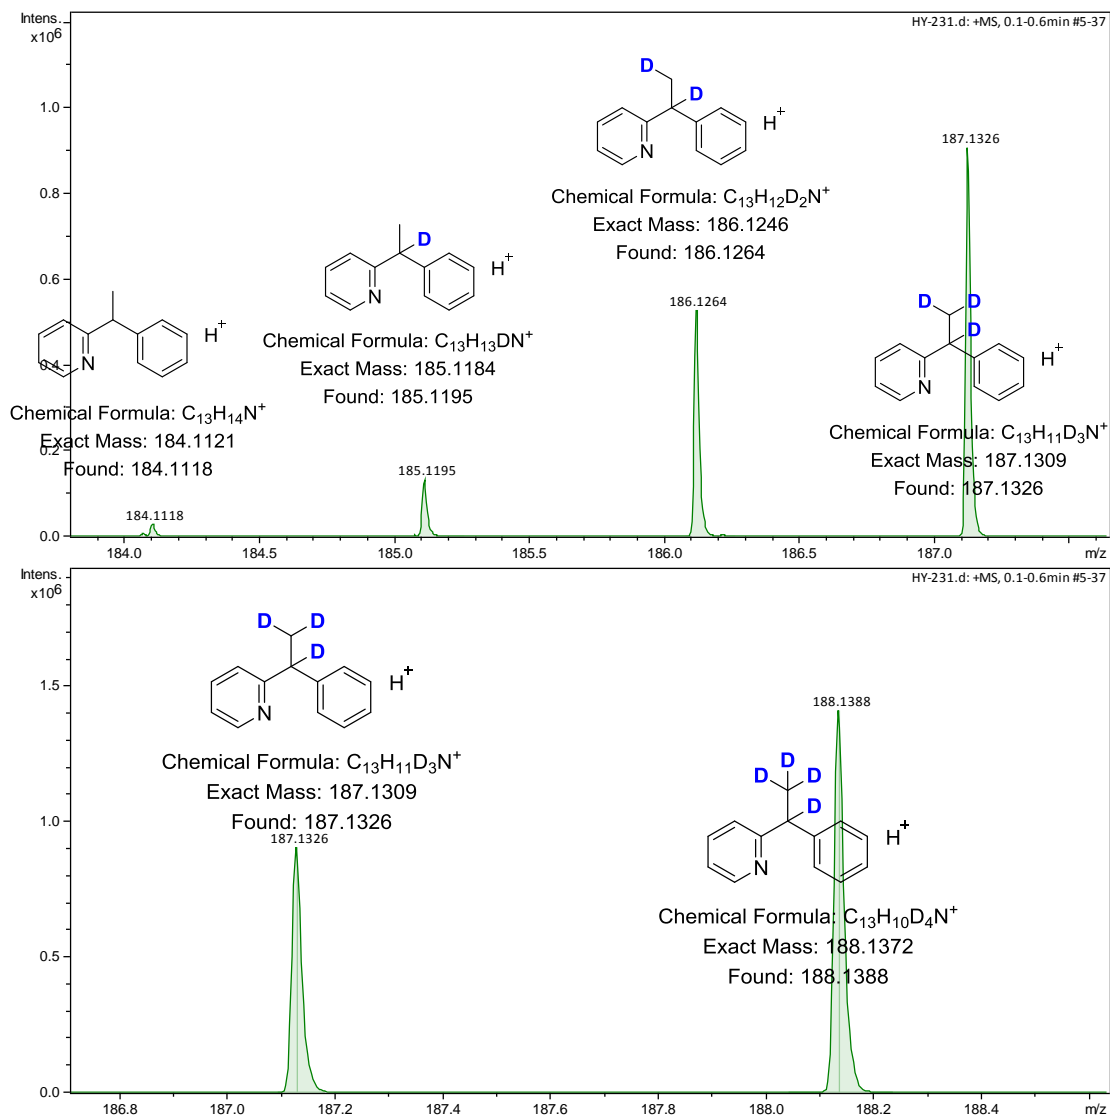

**Figure 15.** HRMS of deuterated product **2** (2.0 equiv.  $CD_3COOD$  and 100 equiv.  $D_2O$ )

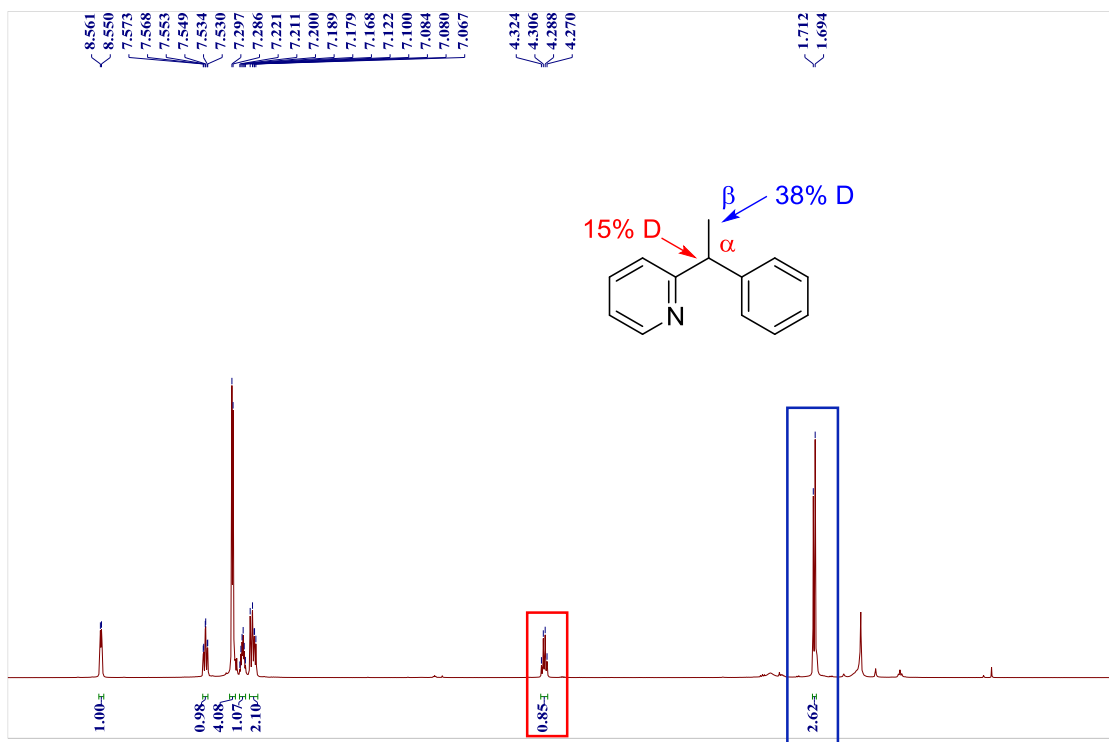

**Figure S16.**  $^1\text{H}$  NMR of deuterated product **2** (2.0 equiv.  $\text{CD}_3\text{COOD}$ )

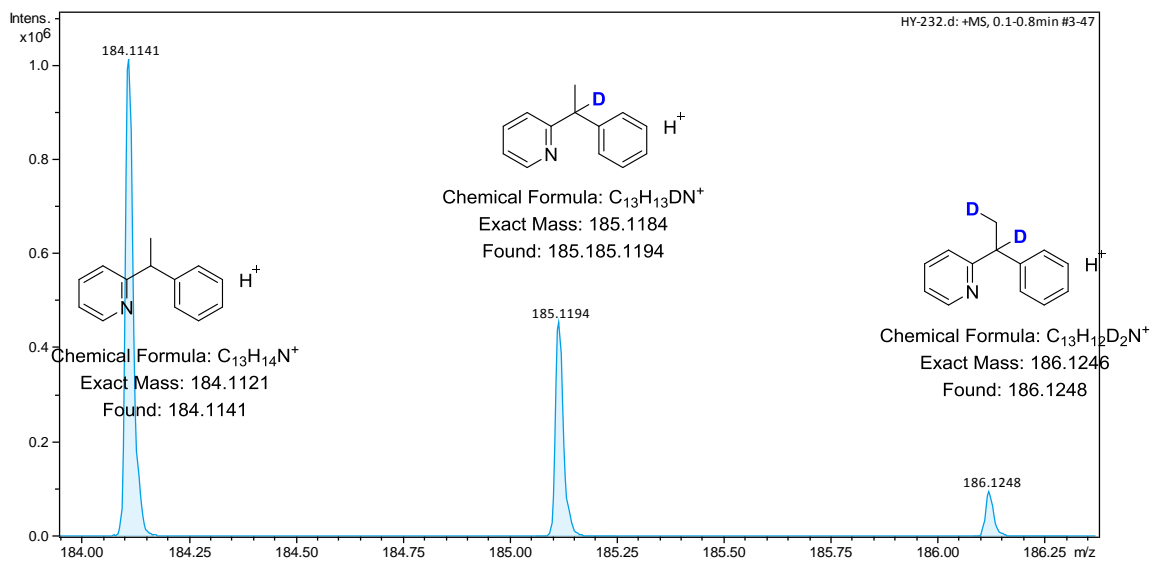

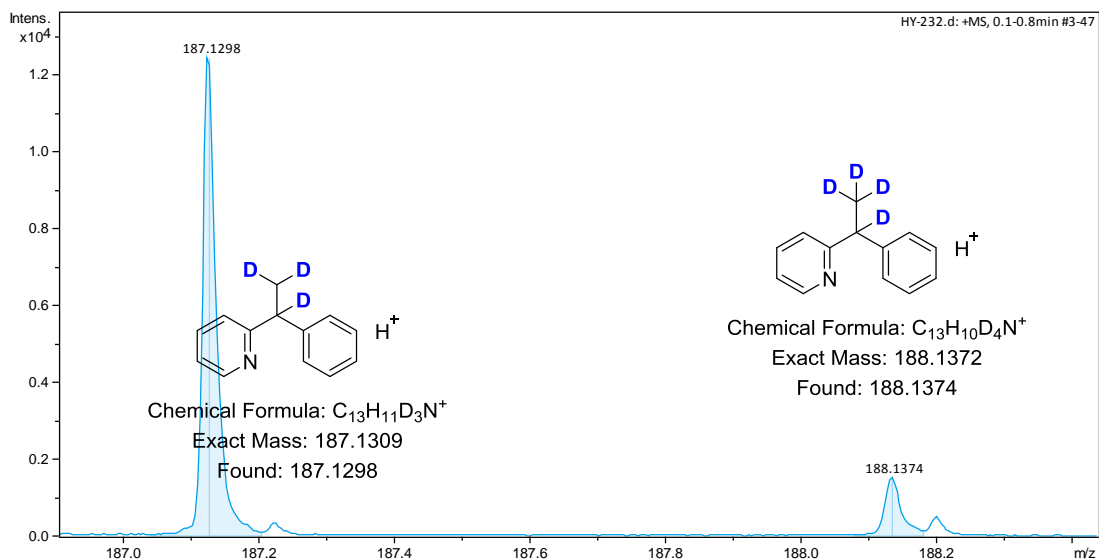

**Figure17.** HRMS of deuterated product **2** (2.0 equiv.  $CD_3COOD$ )

Another labelling experiments with  $D_2O$  were performed as follows: To an oven-dried 20 mL quartz flask equipped with a magnetic stirring bar, **2**,  $CD_3COOD$  (0.30 mmol, 2.0 equiv.),  $D_2O$  (100.0 equiv.), dry  $PhCH_3$  (1.5 mL, 0.1 M),  $PPh_3$  (0.54 mmol, 3.6 equiv.) and  $[Ir(dF(CF_3)ppy)_2dtbbpy]PF_6$  (**PC1**, 2 mol%) were added in sequence. The reaction tube was evacuated and backfilled with Ar three times before light irradiation. The reaction mixture was stirred at ambient temperature under irradiation of 30 W blue LEDs (distance app. 3 cm) for 24 h. After that, the resulting mixture was purified by flash chromatography to afford the corresponding pure product, and the product was analysed by  $^1H$  NMR. It revealed product **2** was not deuterated at all, demonstrating that deuterium was introduced into the product during the reaction.

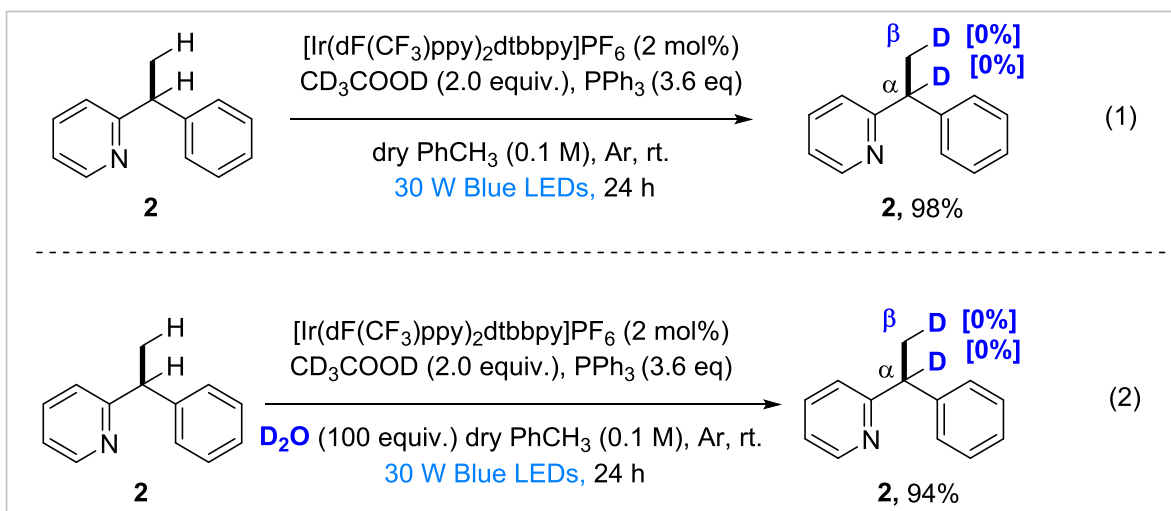



**b) Labelling Experiments by adding H<sub>2</sub>O<sup>18</sup> for hydrogenation reaction (Figure S18)**

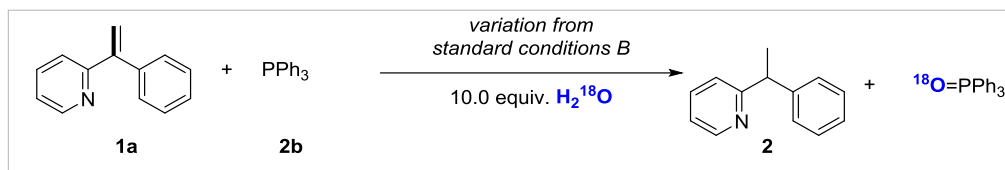

Another designated labelling experiment was set up under the standard conditions with 10.0 equivalent of H<sub>2</sub>O<sup>18</sup>. And ESI-MS of the crude reaction mixture was performed (Figure S18). The desired labelled <sup>18</sup>O product triphenylphosphine oxide-<sup>18</sup>O was observed by HRMS. HRMS (EI): [<sup>18</sup>O]-<sup>18</sup>O=PPh<sub>3</sub> C<sub>18</sub>H<sub>15</sub>Na<sup>18</sup>OP<sup>+</sup>, [M+Na]<sup>+</sup> calcd: 303.0795, Found: 303.0789. Additionally, none <sup>18</sup>O-labelled triphenylphosphine oxide (<sup>18</sup>O=PPh<sub>3</sub>) and product 2 were also observed by HRMS. HRMS (EI): O=PPh<sub>3</sub> C<sub>18</sub>H<sub>15</sub>NaOP<sup>+</sup>, [M+Na]<sup>+</sup> calcd: 301.0753, Found: 301.0746; 2 C<sub>13</sub>H<sub>13</sub>NNa<sup>+</sup>, [M+Na]<sup>+</sup> calcd: 206.0940, Found: 206.0940.

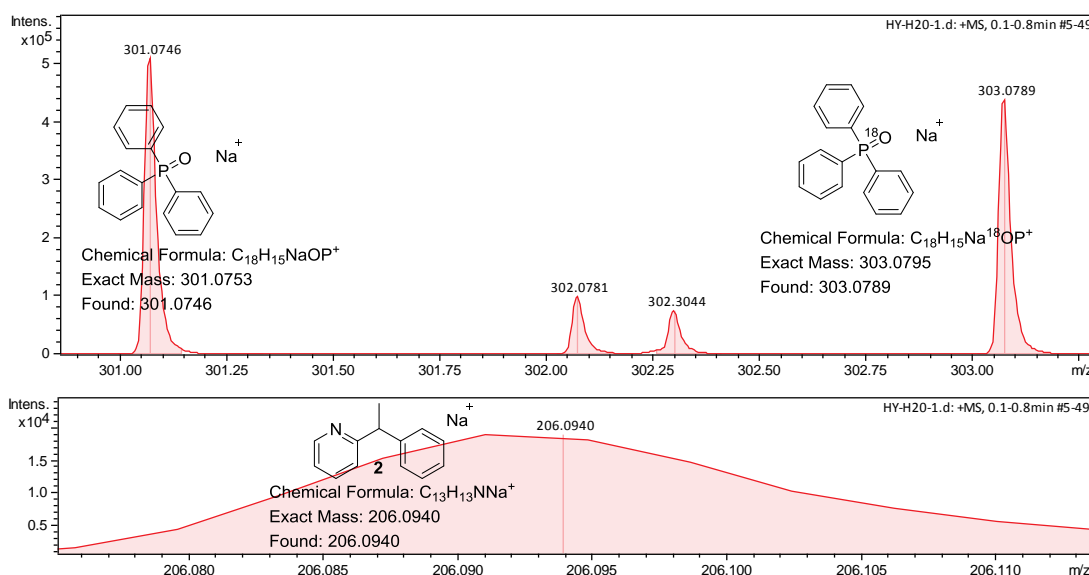

**Figure 18** ESI-MS analysis of <sup>18</sup>O labeling experiment for hydrogenation reaction

**In situ <sup>31</sup>P NMR**

**In situ <sup>31</sup>P NMR for olefin hydrogenation reaction (Figure S19)**

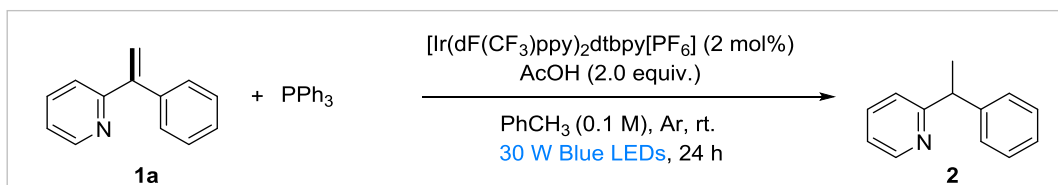

*In situ* <sup>31</sup>P NMR monitoring experiments were set up according to the standard reaction conditions:

**1a** (0.45 mmol, 1.0 equiv.), AcOH (0.90 mmol, 2.0 equiv.), PPh<sub>3</sub> (1.62 mmol, 3.6 equiv.) and [Ir(dF(CF<sub>3</sub>)ppy)<sub>2</sub>dtbbpy]PF<sub>6</sub> (**PC1**, 2 mol%) were added in PhCH<sub>3</sub> (4.5 mL, 0.1 M). The reaction tube was evacuated and backfilled with Ar three times before light irradiation. The reaction was stopped over time interval of 5 min, 30 min, 1 h, 2 h, 6 h, 12 h, 24h, and the reaction solution was analyzed by <sup>31</sup>P NMR in CDCl<sub>3</sub>. As detected by <sup>31</sup>P NMR (Figure S19), the amount of the triphenylphosphine oxide (O=PPh<sub>3</sub>) gradually increases over time.

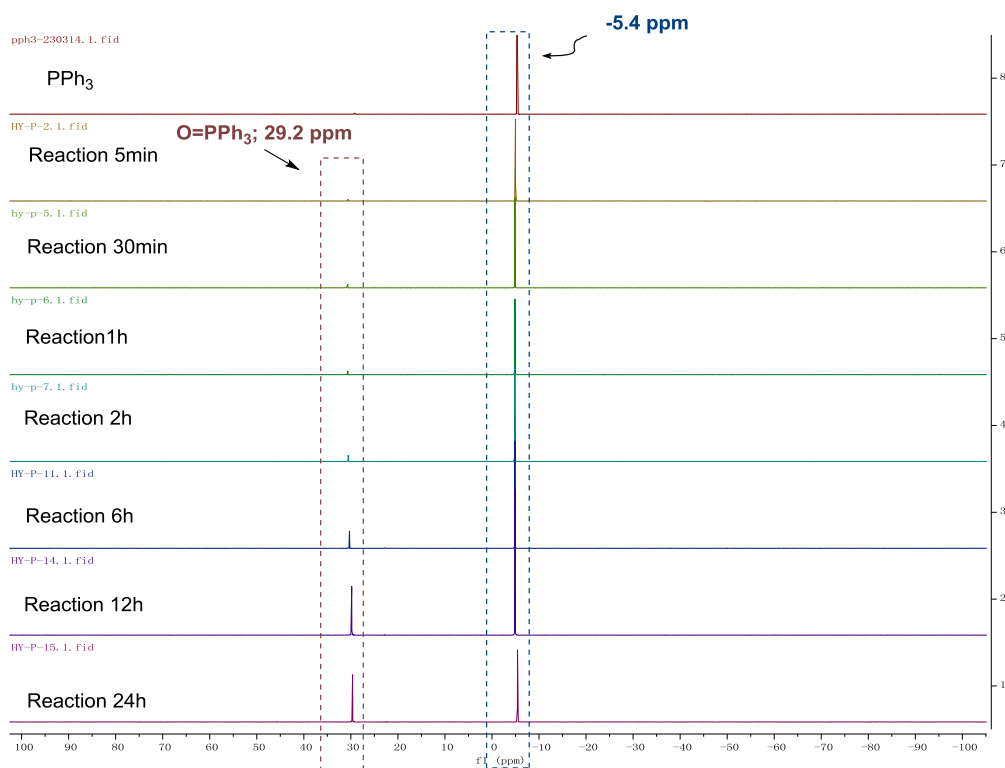

**Figure S19.** *In situ* <sup>31</sup>P NMR studies for olefin hydrogenation reaction

### Detection of hydrogen gas H<sub>2</sub>

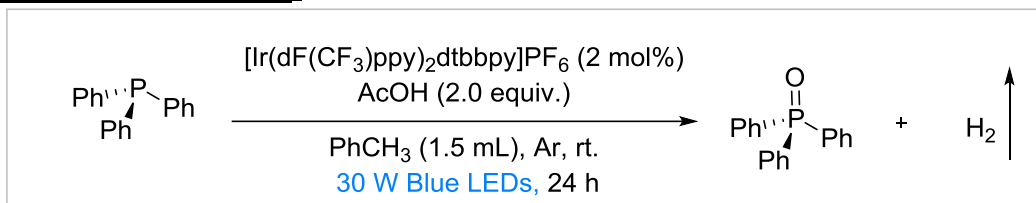

To an oven-dried 15 mL quartz flask equipped with a magnetic stirring bar, triphenyl phosphine PPh<sub>3</sub> (0.54 mmol, 3.6 equiv.) and [Ir(dFCF<sub>3</sub>ppy)<sub>2</sub>dtbbpy]PF<sub>6</sub> (**PC1**, 2 mol%) were added. The reaction tube was evacuated and backfilled with argon three times. Then, PhCH<sub>3</sub> (1.5 mL) and AcOH (0.3 mmol, 2.0 equiv.) were added under argon atmosphere *via* syringe. The tube was placed in the photoreactor and stirred at ambient temperature (*note: the reaction temperature ranges from*

25 °C to 40 °C) under irradiation of 30 W blue LEDs (distance app. 3 cm). After 24 hours, the irradiation was stopped, and the upper atmosphere was analyzed by GC. The sample was subjected to GC-TCD analysis. Moreover, 10 mL of  $\text{CDCl}_3$  was added and the reaction mixture was continued to be analyzed by  $^{31}\text{P}$  NMR.

### GC spectrum

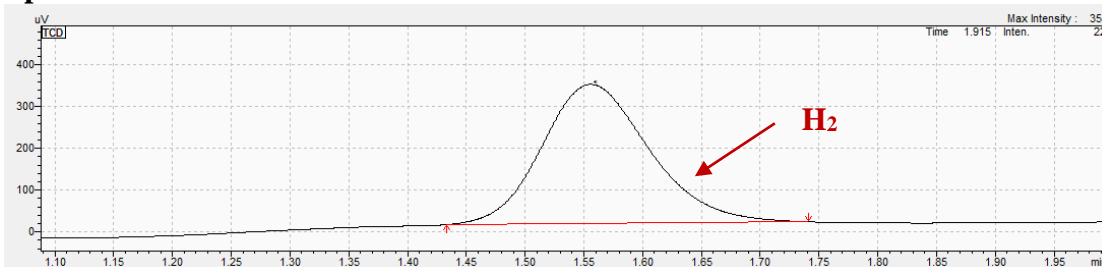

Figure S20. The GC spectrum for detection of hydrogen gas  $\text{H}_2$

### ※ Notes:

No hydrogen gas was detected without  $\text{PPh}_3$

### 1) Detected by NMR

#### $^{31}\text{P}$ NMR (162 MHz, $\text{CDCl}_3$ )

XZZ-H211-0226.1.fid

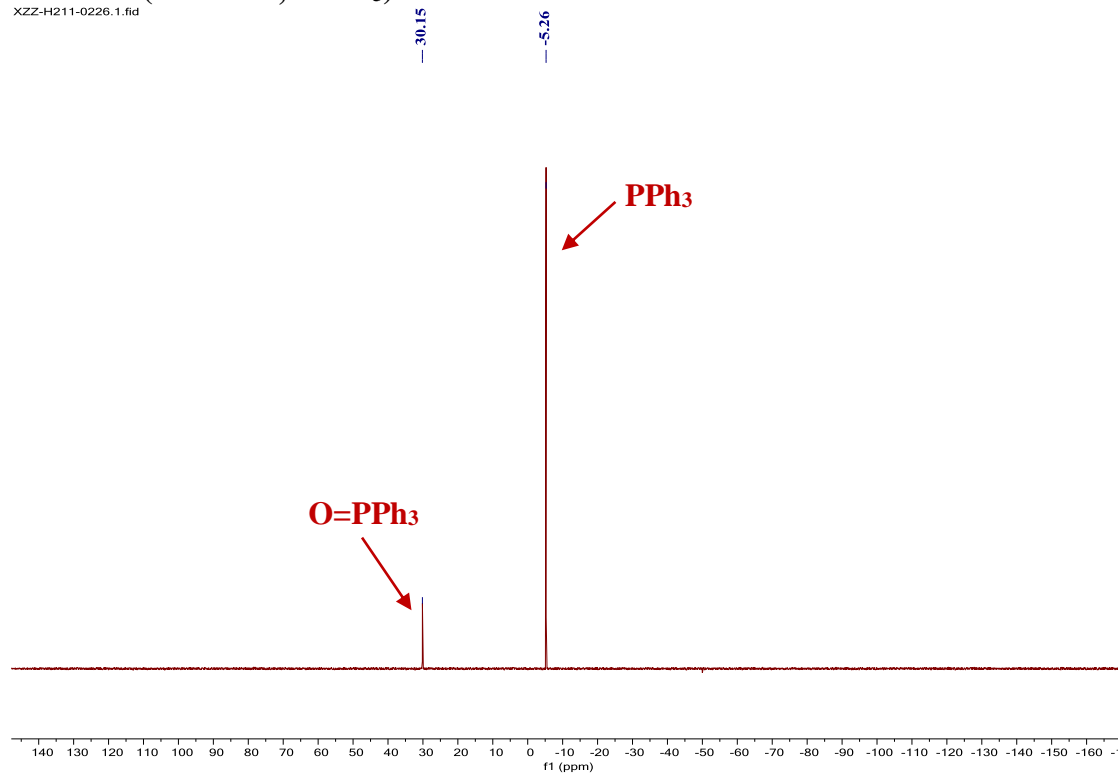

## Verification of radical anion intermediate

To investigate whether reductive activation  $\pi$  bonds of alkene to a nucleophilic radical anion, a reaction between 2-(1-phenylvinyl)pyridine (**1a**) or acrylamide (**1a'**) with acetone was conducted under standard conditions. Notably, acetone not only used as reaction solvent, but also utilized as the electrophilic partner. Only hydrogenated product **2** or **20** was observed, without the formation of the tertiary alcohol product **32** or **33** which generated from a direct addition of nucleophilic radical anion to ketones. These results confirm that the direct reductive activation of **1a** or **1a'** to a radical anion intermediate did not occur under the reaction conditions, which was differ from the previous work of Polyzos<sup>[8]</sup>.

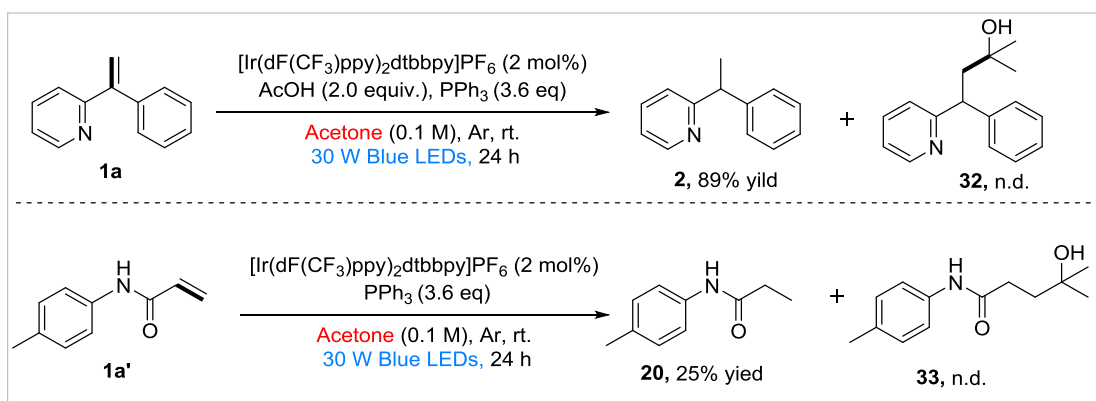

## ON-OFF study

### Time profile for the hydrogenation reaction with the light ON-OFF over time (Figure S21)

ON-OFF experiments were set up parallel on a 0.30 mmol scale according to the standard condition, and extra 1.0 equiv. of benzotrifluoride was added as internal standard. The reaction started with successive irradiation and black periods to study the influence of continuous irradiation of the visible-light for the progress. After being irradiated with 30 W blue LEDs for 2 h, an aliquot (0.25 mL) from the reaction mixture was transferred into a nuclear magnetic tube charged with 0.35 mL CDCl<sub>3</sub>-d<sub>1</sub>. The yield of the product **2** was determined by <sup>19</sup>F NMR. Then, the reaction mixture was stirred with light-off for 2 h. All of the following yields were analyzed in the identical way after a 2-hour light-on or light-off. These results revealed that light is a necessary component of the reaction (Figure S21).

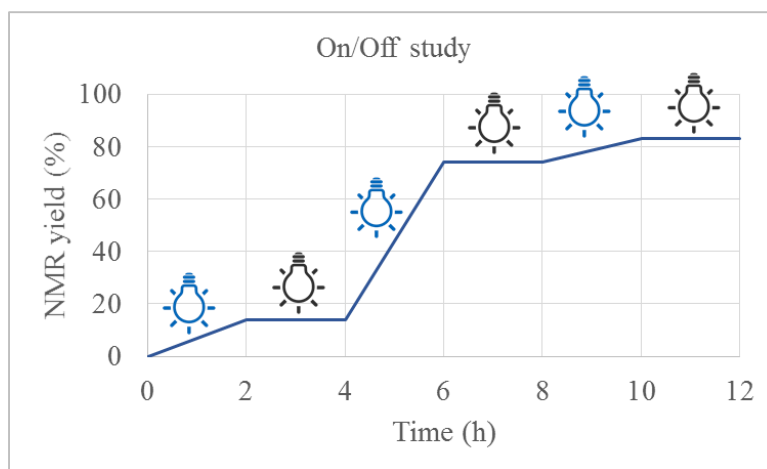

**Figure S21.** Time profile for hydrogenation reaction with the light On/Off over time

### Verification of intermediate

#### *General Procedures for the synthesis of phosphonium tetrafluoroborate 2a*

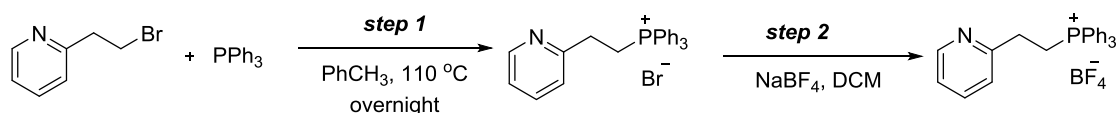

**Step 1:** 2-(2-bromoethyl)pyridine (5.0 mmol, 1.0 equiv.), PhCH<sub>3</sub> (2.0 mL) and PPh<sub>3</sub> (6.0 mmol, 1.20 equiv.) were added sequentially to a 15 mL Schlenk flask. The vial was evacuated and backfilled with Ar three times. Then reaction mixture was placed in an oil bath at 110 °C (pre-heated) for 12 h. After cooling to rt., diethyl ether was added. The mixture was filtered, and the obtained precipitate was washed by diethyl ether. Then, the precipitate was dried in vacuum to give the corresponding phosphonium bromide.

**Step 2:** The corresponding phosphonium bromide was dissolved in DCM (25 mL). Then, the solution was repeatedly treated with 5% aqueous NaBF<sub>4</sub> solution (3 × 15 mL) and washed with H<sub>2</sub>O (2 × 10 mL). The organic layer was removed in *vacuo* and dried under high vacuum to afford the corresponding phosphonium tetrafluoroborate **2a**.

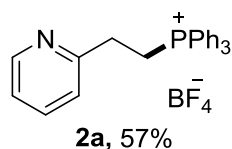

**2a:** white solid, 57% yield (1.30 g);

**m.p.** 114.4 – 116.4 °C;

**IR** (neat)  $\nu$  1596, 1438, 1285, 1191, 1032, 935, 752, 527  $\text{cm}^{-1}$ ;

**$^1\text{H}$  NMR** (400 MHz, Chloroform-*d*)  $\delta$  8.35 (d,  $J = 4.3$  Hz, 1H), 7.80 – 7.68 (m, 15H), 7.55 (t,  $J = 7.8$  Hz, 1H), 7.28 (d,  $J = 7.7$  Hz, 1H), 7.10 – 7.07 (m, 1H), 3.77 (dt,  $J = 12.5, 7.7$  Hz, 2H), 3.25 (dt,  $J = 14.4, 7.6$  Hz, 2H).

**$^{19}\text{F}$  NMR** (376 MHz, Chloroform-*d*)  $\delta$  -152.69;

**$^{11}\text{B}$  NMR** (128 MHz, Chloroform-*d*)  $\delta$  -0.88;

**$^{31}\text{P}$  NMR** (162 MHz, Chloroform-*d*)  $\delta$  23.76;

**$^{13}\text{C}$  NMR** (100 MHz, Chloroform-*d*)  $\delta$  156.7, 156.6, 148.9, 137.2, 135.2 (d,  $^4J_{\text{C-P}} = 3.0$  Hz), 133.4 (d,  $^3J_{\text{C-P}} = 10.1$  Hz), 130.5 (d,  $^2J_{\text{C-P}} = 12.7$  Hz), 123.7, 122.3, 117.9 (d,  $^1J_{\text{C-P}} = 86.7$  Hz), 29.9 (d,  $^2J_{\text{C-P}} = 3.4$  Hz,  $\text{PyCH}_2\text{CH}_2\text{P}$ ), 21.4 (d,  $^1J_{\text{C-P}} = 53.0$  Hz,  $\text{PyCH}_2\text{CH}_2\text{P}$ );

**HRMS** (ESI):  $\text{C}_{25}\text{H}_{23}\text{NP}^+$ ,  $[\text{M}]^+$  Calcd 368.1563, Found 368.1547.

### Verification of intermediate for hydrogenation reaction (Scheme S3)

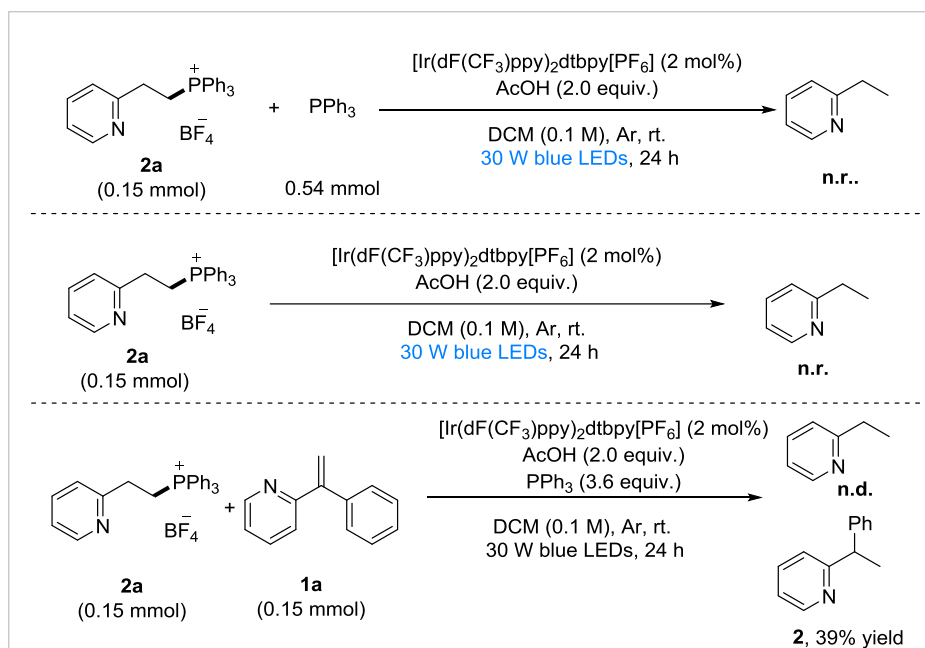

A series of control experiments were set up by subjected phosphonium tetrafluoroborate **2a** to the variation standard conditions to determine whether phosphonium salt was involved in reduction transformation process. Unfortunately, no desired product was obtained, which indicated that phosphonium salt **2a** not intermediate in the reduction reaction.

## Proposed mechanism for product 20-30

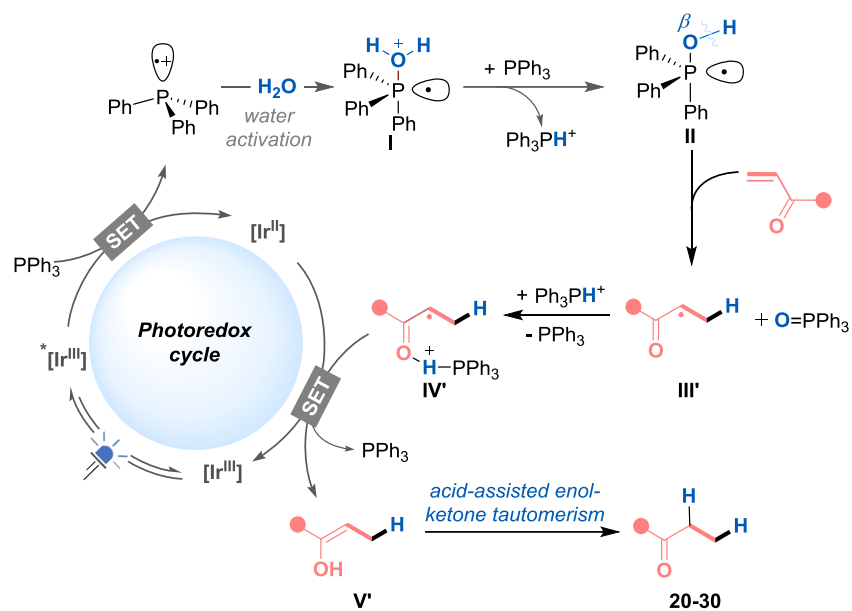

## Proposed mechanism for product 31

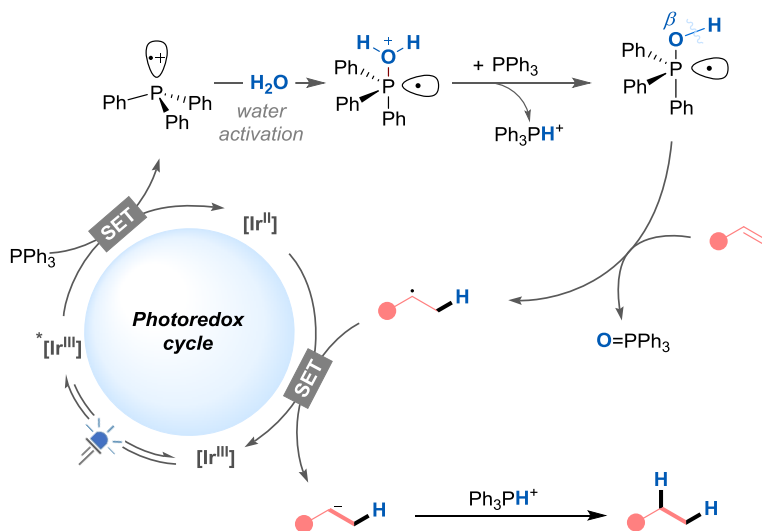

## 5. Characterization Data of Compounds 2-31

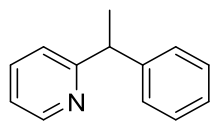

**2**, 24h  
97% yield

**2**: colorless oil (27 mg, 97% yield) from **1a** (0.15 mmol, 27 mg) under standard conditions (PE/EA = 3%);

**<sup>1</sup>H NMR** (400 MHz, Chloroform-*d*)  $\delta$  8.55 (d,  $J = 4.7$  Hz, 1H), 7.55 (t,  $J = 7.7$  Hz, 1H), 7.30 – 7.28 (m, 4H), 7.19 (dq,  $J = 8.6, 4.2$  Hz, 1H), 7.12 – 7.06 (m, 2H), 4.29 (q,  $J = 7.2$  Hz, 1H), 1.70 (d,  $J = 7.2$  Hz, 3H).

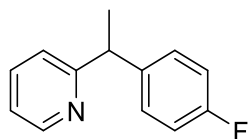

**3**, 24h  
60% yield

**3**: colorless oil (18 mg, 60% yield) from **1b** (0.15 mmol, 30 mg) under standard conditions (PE/EA = 3%);

**<sup>1</sup>H NMR** (400 MHz, Chloroform-*d*)  $\delta$  8.56 (dd,  $J = 5.7, 1.5$  Hz, 1H), 7.57 (td,  $J = 7.7, 1.8$  Hz, 1H), 7.27 – 7.23 (m, 2H), 7.11 – 7.08 (m, 2H), 7.00 – 6.95 (m, 2H), 4.27 (q,  $J = 7.2$  Hz, 1H), 1.68 (d,  $J = 7.2$  Hz, 3H);

**<sup>19</sup>F NMR** (376 MHz, Chloroform-*d*)  $\delta$  -117.08.

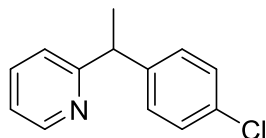

**4**, 24h  
77% yield

**4**: colorless oil (25 mg, 77% yield) from **1c** (0.15 mmol, 32 mg) under standard conditions (PE/EA = 4%);

**<sup>1</sup>H NMR** (400 MHz, Chloroform-*d*)  $\delta$  8.55 (dd,  $J = 5.0, 1.6$  Hz, 1H), 7.57 (td,  $J = 7.7, 1.7$  Hz, 1H), 7.26 – 7.21 (m, 4H), 7.11 – 7.09 (m, 2H), 4.26 (q,  $J = 7.2$  Hz, 1H), 1.68 (d,  $J = 7.2$  Hz, 3H).



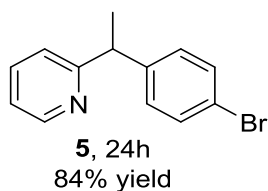

**5**: yellow oil (33 mg, 84% yield) from **1d** (0.15 mmol, 39 mg) under standard conditions (PE/EA = 3%);

**<sup>1</sup>H NMR** (400 MHz, Chloroform-*d*)  $\delta$  8.55 (d,  $J = 3.6$  Hz, 1H), 7.59 – 7.55 (m, 1H), 7.40 (d,  $J = 8.3$  Hz, 2H), 7.17 (d,  $J = 8.3$  Hz, 2H), 7.10 (d,  $J = 7.7$  Hz, 2H), 4.24 (q,  $J = 7.2$  Hz, 1H), 1.68 (d,  $J = 7.2$  Hz, 3H);

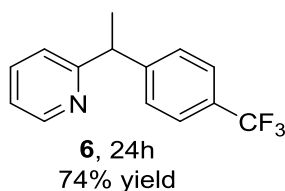

**6**: colorless oil (28 mg, 74% yield) from **1e** (0.15 mmol, 37 mg) under standard conditions (PE/EA = 4%);

**<sup>1</sup>H NMR** (400 MHz, Chloroform-*d*)  $\delta$  8.49 (d,  $J = 4.6$  Hz, 1H), 7.54 (td,  $J = 7.7, 1.8$  Hz, 1H), 7.46 (d,  $J = 8.1$  Hz, 2H), 7.33 (d,  $J = 8.1$  Hz, 2H), 7.04 (t,  $J = 7.1$  Hz, 2H), 4.26 (q,  $J = 7.2$  Hz, 1H), 1.64 (d,  $J = 7.2$  Hz, 3H);

**<sup>19</sup>F NMR** (376 MHz, Chloroform-*d*)  $\delta$  -62.39;

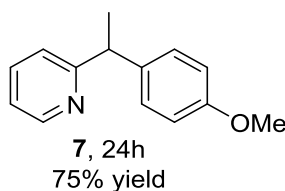

**7**: yellow oil (24 mg, 75% yield) from **1f** (0.15 mmol, 32 mg) under standard conditions (PE/EA = 5%);

**<sup>1</sup>H NMR** (400 MHz, Chloroform-*d*)  $\delta$  8.47 (d,  $J = 4.3$  Hz, 1H), 7.47 (td,  $J = 7.7, 1.5$  Hz, 1H), 7.14 (d,  $J = 8.6$  Hz, 2H), 7.03 – 6.98 (m, 2H), 6.76 (d,  $J = 8.6$  Hz, 2H), 4.17 (q,  $J = 7.2$  Hz, 1H), 3.69 (s, 3H), 1.60 (d,  $J = 7.2$  Hz, 3H).

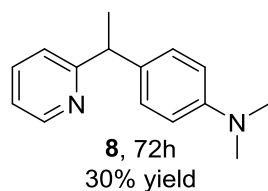

**8**: colorless oil (10 mg, 30% yield) from **1g** (0.15 mmol, 34 mg) under standard conditions (PE/EA = 12%);

**IR** (neat)  $\nu$  2798, 1519, 1431, 1224, 1059, 946, 748, 550  $\text{cm}^{-1}$ ;

**$^1\text{H}$  NMR** (400 MHz, Chloroform-*d*)  $\delta$  8.54 (d,  $J = 4.1$  Hz, 1H), 7.54 (td,  $J = 7.7, 1.8$  Hz, 1H), 7.17 (d,  $J = 8.7$  Hz, 2H), 7.12 – 7.05 (m, 2H), 6.70 (d,  $J = 8.7$  Hz, 2H), 4.21 (q,  $J = 7.2$  Hz, 1H), 2.90 (s, 6H), 1.67 (d,  $J = 7.2$  Hz, 3H);

**$^{13}\text{C}$  NMR** (100 MHz, Chloroform-*d*)  $\delta$  165.9, 149.2, 148.9, 136.4, 133.1, 128.3, 122.0, 121.0, 112.9, 46.4, 40.8, 20.8;

**HRMS** (ESI):  $\text{C}_{15}\text{H}_{18}\text{N}_2\text{Na}^+$ ,  $[\text{M}+\text{Na}]^+$  Calcd 249.1362, Found 249.1343.

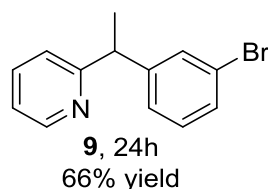

**9**: colorless oil (26 mg, 66% yield) from **1h** (0.15 mmol, 39 mg) under standard conditions (PE/EA = 4%);

**IR** (neat)  $\nu$  2928, 1567, 1431, 1283, 1073, 996, 746, 591  $\text{cm}^{-1}$ ;

**$^1\text{H}$  NMR** (400 MHz, Chloroform-*d*)  $\delta$  8.49 (d,  $J = 4.0$  Hz, 1H), 7.51 (td,  $J = 7.7, 1.6$  Hz, 1H), 7.37 (s, 1H), 7.25 (d,  $J = 7.8$  Hz, 1H), 7.15 (d,  $J = 7.6$  Hz, 1H), 7.09 (d,  $J = 8.0$  Hz, 1H), 7.05 – 7.02 (m, 2H), 4.17 (q,  $J = 7.1$  Hz, 1H), 1.61 (d,  $J = 7.2$  Hz, 3H);

**$^{13}\text{C}$  NMR** (100 MHz, Chloroform-*d*)  $\delta$  164.1, 149.3, 147.5, 136.6, 130.8, 130.0, 129.4, 126.4, 122.6, 122.1, 121.5, 47.1, 20.7;

**HRMS** (ESI):  $\text{C}_{13}\text{H}_{13}\text{BrN}^+$ ,  $[\text{M}+\text{H}]^+$  Calcd 262.0226, Found 262.0249.

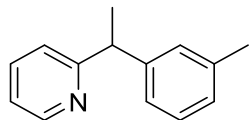

**10**, 24h  
74% yield

**10**: colorless oil (22.0 mg, 74% yield) from **1i** (0.15 mmol, 29 mg) under standard conditions (PE/EA = 4%);

**<sup>1</sup>H NMR** (400 MHz, Chloroform-*d*)  $\delta$  8.56 (d,  $J = 4.4$  Hz, 1H), 7.55 (td,  $J = 7.7, 1.7$  Hz, 1H), 7.18 (t,  $J = 7.6$  Hz, 1H), 7.13 – 7.06 (m, 4H), 7.00 (d,  $J = 7.4$  Hz, 1H), 4.26 (q,  $J = 7.2$  Hz, 1H), 2.31 (s, 3H), 1.69 (d,  $J = 7.2$  Hz, 3H).

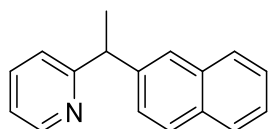

**11**, 24h  
57% yield

**11**: colorless oil (20 mg, 57% yield) from **1j** (0.15 mmol, 35 mg) under standard conditions (PE/EA = 4%);

**<sup>1</sup>H NMR** (400 MHz, Chloroform-*d*)  $\delta$  8.58 (d,  $J = 4.5$  Hz, 1H), 7.77 (q,  $J = 8.8, 8.0$  Hz, 4H), 7.54 (td,  $J = 7.7, 1.6$  Hz, 1H), 7.46 – 7.38 (m, 3H), 7.15 – 7.07 (m, 2H), 4.46 (q,  $J = 7.2$  Hz, 1H), 1.80 (d,  $J = 7.2$  Hz, 3H);

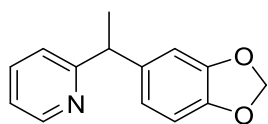

**12**, 24h  
65% yield

**12**: colorless oil (22 mg, 65% yield) from **1k** (0.15 mmol, 34 mg) under standard conditions (PE/EA = 5%);

**IR** (neat)  $\nu$  2928, 1588, 1432, 1233, 1036, 935, 748, 547  $\text{cm}^{-1}$ ;

**<sup>1</sup>H NMR** (400 MHz, Chloroform-*d*)  $\delta$  8.55 (d,  $J = 4.1$  Hz, 1H), 7.57 (td,  $J = 7.7, 1.8$  Hz, 1H), 7.13 – 7.08 (m, 2H), 6.78 – 6.72 (m, 3H), 5.90 (s, 2H), 4.21 (q,  $J = 7.2$  Hz, 1H), 1.66 (d,  $J = 7.2$  Hz, 3H);

---

$^{13}\text{C}$  NMR (100 MHz, Chloroform-*d*)  $\delta$  165.0, 149.1, 147.7, 145.9, 139.1, 136.5, 122.0, 121.3 120.6, 108.21, 108.15, 100.9, 47.0, 21.0.

HRMS (ESI):  $\text{C}_{14}\text{H}_{13}\text{NNaO}_2^+$ ,  $[\text{M}+\text{Na}]^+$  Calcd 250.0838, Found 250.0842.

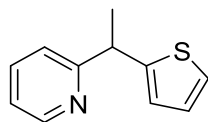

**13**, 24h  
39% yield

**13**: yellow oil (11mg, 39% yield) from **11** (0.15 mmol, 28 mg) under standard conditions (PE/EA = 4%);

IR (neat)  $\nu$  2928, 1589, 1432, 1233, 1044, 993, 748, 540  $\text{cm}^{-1}$ ;

$^1\text{H}$  NMR (400 MHz, Chloroform-*d*)  $\delta$  8.57 (d,  $J = 4.6$  Hz, 1H), 7.62 – 7.58 (m, 1H), 7.19 – 7.11 (m, 3H), 6.95 – 6.92 (m, 1H), 6.89 – 6.88 (m, 1H), 4.53 (q,  $J = 7.1$  Hz, 1H), 1.76 (d,  $J = 7.2$  Hz, 3H);

$^{13}\text{C}$  NMR (100 MHz, Chloroform-*d*)  $\delta$  164.5, 149.1, 148.7, 136.7, 126.6, 123.9, 123.8, 121.6, 43.2, 22.1;

HRMS (ESI):  $\text{C}_{11}\text{H}_{12}\text{NS}^+$ ,  $[\text{M}+\text{Na}]^+$  Calcd 190.0685, Found 190.0708.

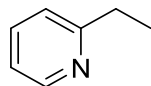

**14**, 24h  
80% yield

**14**: colorless oil (80% yield), yield of the product was determined by  $^1\text{H}$  NMR using dibromomethane as internal standard from **1m** (0.15 mmol, 16 mg);

$^1\text{H}$  NMR (400 MHz, Chloroform-*d*)  $\delta$  8.36 (d,  $J = 4.8$  Hz, 1H), 7.38 (td,  $J = 7.7, 1.6$  Hz, 1H), 6.96 (d,  $J = 7.8$  Hz, 1H), 6.90 – 6.87 (m, 1H), 2.66 (q,  $J = 7.6$  Hz, 2H), 1.15 (t,  $J = 8.0$  Hz, 3H).

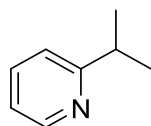

**15**, 24h  
61% yield

---

**15:** colorless oil (11 mg, 61% yield) from **1n** (0.15 mmol, 18 mg) under standard conditions (PE/EA = 3%);

**<sup>1</sup>H NMR** (400 MHz, Chloroform-*d*)  $\delta$  8.54 (d,  $J = 4.5$  Hz, 1H), 7.61 (td,  $J = 7.7, 1.6$  Hz, 1H), 7.18 (d,  $J = 7.9$  Hz, 1H), 7.12 – 7.08 (m, 1H), 3.06 (dq,  $J = 13.7, 6.9$  Hz, 1H), 1.31 (t,  $J = 6.9$  Hz, 6H).

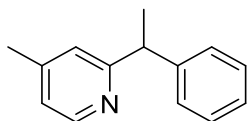

**16**, 24h  
51% yield

**16:** colorless oil (15 mg, 51% yield) from **1o** (0.15 mmol, 29 mg) under standard conditions (PE/EA = 4%); **<sup>1</sup>H NMR** (400 MHz, Chloroform-*d*)  $\delta$  8.41 (d,  $J = 5.0$  Hz, 1H), 7.30 -7.29 (m, 4H), 7.21 – 7.17 (m, 1H), 6.93 – 6.91 (m, 2H), 4.25 (q,  $J = 7.2$  Hz, 1H), 2.27 (s, 3H), 1.69 (d,  $J = 7.2$  Hz, 3H).

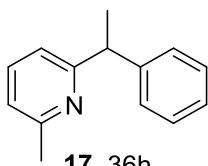

**17**, 36h  
81% yield

**17:** colorless oil (24 mg, 81% yield) from **1p** (0.15 mmol, 29 mg) under standard conditions (PE/EA = 3%);

**IR** (neat)  $\nu$  2928, 1589, 1451, 1155, 1029, 991, 744, 544  $\text{cm}^{-1}$ ;

**<sup>1</sup>H NMR** (400 MHz, Chloroform-*d*)  $\delta$  7.43 (t,  $J = 7.7$  Hz, 1H), 7.32 -7.27 (m, 4H), 7.20 – 7.17 (m, 1H), 6.93 (d,  $J = 7.6$  Hz, 1H), 6.86 (d,  $J = 7.6$  Hz, 1H), 4.28 (q,  $J = 7.2$  Hz, 1H), 2.54 (s, 3H), 1.68 (d,  $J = 7.2$  Hz, 3H);

**<sup>13</sup>C NMR** (100 MHz, Chloroform-*d*)  $\delta$  164.7, 157.6, 145.1, 136.6, 128.4, 127.8, 126.2, 120.7, 118.7, 47.5, 24.6, 21.0;

**HRMS** (ESI):  $\text{C}_{14}\text{H}_{15}\text{NNa}^+$ ,  $[\text{M}+\text{Na}]^+$  Calcd 220.1097, Found 220.1101.

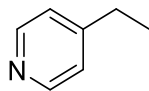

**18**, 24h  
56% yield

**18**: colorless oil (56% yield), yield of the product was determined by  $^1\text{H}$  NMR using dibromomethane as internal standard from **1q** (0.15 mmol, 16 mg);

$^1\text{H}$  NMR (400 MHz, Chloroform-*d*)  $\delta$  8.49 (d,  $J = 3.6$  Hz, 2H), 7.13 (d,  $J = 5.4$  Hz, 2H), 2.65 (q,  $J = 7.6$  Hz, 2H), 1.26 (t,  $J = 7.6$  Hz, 3H).

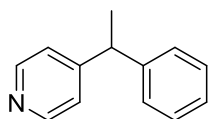

**19**, 24h  
69% yield

**19**: yellow oil (19 mg, 69% yield) from **1r** (0.15 mmol, 27 mg) under standard conditions (PE/EA = 10%);

$^1\text{H}$  NMR (400 MHz, Chloroform-*d*)  $\delta$  8.49 (d,  $J = 3.6$  Hz, 2H), 7.31 (t,  $J = 7.2$  Hz, 2H), 7.24 – 7.18 (m, 3H), 7.13 (d,  $J = 5.6$  Hz, 2H), 4.11 (q,  $J = 7.2$  Hz, 1H), 1.64 (d,  $J = 7.2$  Hz, 3H),

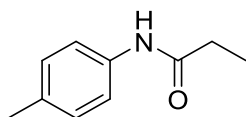

**20**, 24h  
49% yield

**20**: a white solid (12 mg, 49% yield) from **1a'** (0.15 mmol, 25 mg) under standard conditions (PE/EA = 15%);

$^1\text{H}$  NMR (400 MHz, Chloroform-*d*)  $\delta$  7.39 (d,  $J = 8.3$  Hz, 2H), 7.23 (*br s*, 1H), 7.11 (d,  $J = 8.1$  Hz, 2H), 2.37 (q,  $J = 7.5$  Hz, 2H), 2.31 (s, 3H), 1.24 (t,  $J = 7.5$  Hz, 3H);

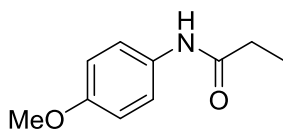

**21**, 24h  
56% yield

**21:** a white solid (15 mg, 56% yield) from **1b'** (0.15 mmol, 27 mg) under standard conditions (PE/EA = 15%);

**<sup>1</sup>H NMR** (400 MHz, Chloroform-*d*)  $\delta$  7.41 (d,  $J = 8.9$  Hz, 2H), 7.17 (*br s*, 1H), 6.85 (d,  $J = 8.9$  Hz, 2H), 3.79 (s, 3H), 2.37 (q,  $J = 7.6$  Hz, 2H), 1.24 (t,  $J = 7.5$  Hz, 3H).

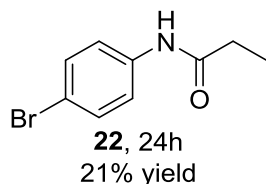

**22:** a white solid (7 mg, 21% yield) from **1c'** (0.15 mmol, 34 mg) under standard conditions (PE/EA = 15%);

**<sup>1</sup>H NMR** (400 MHz, Chloroform-*d*)  $\delta$  7.42 (s, 4H), 7.22 (*br s*, 1H), 2.39 (q,  $J = 7.5$  Hz, 2H), 1.24 (t,  $J = 7.5$  Hz, 3H).

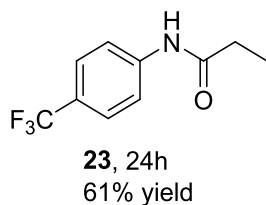

**23:** a white solid (20.0 mg, 61% yield) from **1d'** (0.15 mmol, 32 mg) under standard conditions (PE/EA = 15%);

**m.p.** 131.0 – 133.0 °C;

**IR** (neat)  $\nu$  2917, 1541, 1410, 1150, 1016, 928, 731, 507  $\text{cm}^{-1}$ ;

**<sup>1</sup>H NMR** (400 MHz, Chloroform-*d*)  $\delta$  7.65 (d,  $J = 8.3$  Hz, 2H), 7.59 (s, 1H), 7.56 (d,  $J = 8.5$  Hz, 2H), 2.43 (q,  $J = 7.5$  Hz, 2H), 1.25 (t,  $J = 7.5$  Hz, 3H);

**<sup>19</sup>F NMR** (376 MHz, Chloroform-*d*)  $\delta$  -62.11;

**<sup>13</sup>C NMR** (100 MHz, Chloroform-*d*)  $\delta$  172.5, 141.0, 126.2 (q,  $^3J_{C-F} = 3.7$  Hz,  $\underline{\text{CHCCF}}_3$ ), 124.1 (q,  $^1J_{C-F} = 271.5$  Hz,  $\underline{\text{CF}}_3$ ), 119.3, 30.8, 9.5;

**HRMS** (ESI):  $\text{C}_{10}\text{H}_{10}\text{F}_3\text{NNaO}^+$ ,  $[\text{M}+\text{Na}]^+$  Calcd 240.0607, Found 240.0631.

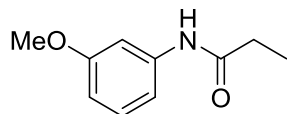

**24**, 24h  
48% yield

**24:** a white solid (13 mg, 48% yield) from **1e'** (0.15 mmol, 27 mg) under standard conditions (PE/EA = 20%);

**<sup>1</sup>H NMR** (400 MHz, Chloroform-*d*)  $\delta$  7.33 (s, 1H), 7.23 – 7.17 (m, 2H), 6.95 (d,  $J = 7.6$  Hz, 1H), 6.65 (d,  $J = 7.2$  Hz, 1H), 3.80 (s, 3H), 2.38 (q,  $J = 7.5$  Hz, 2H), 1.24 (t,  $J = 7.5$  Hz, 3H).

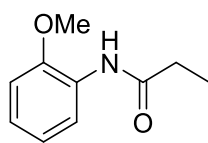

**25**, 24h  
45% yield

**25:** colorless oil (12 mg, 45% yield) from **1f'** (0.15 mmol, 27 mg) under standard conditions (PE/EA = 15%);

**<sup>1</sup>H NMR** (400 MHz, Chloroform-*d*)  $\delta$  8.39 (d,  $J = 7.7$  Hz, 1H), 7.77 (*br s*, 1H), 7.05 -7.01 (m, 1H), 6.98 – 6.94 (m, 1H), 6.88 – 6.86 (m, 1H), 3.88 (s, 3H), 2.43 (q,  $J = 7.6$  Hz, 2H), 1.26 (t,  $J = 7.5$  Hz, 3H).

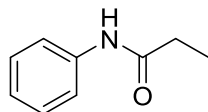

**26**, 24h  
40% yield

**26:** a white solid (9 mg, 40% yield) from **1g'** (0.15 mmol, 22 mg) under standard conditions (PE/EA = 17%);

**<sup>1</sup>H NMR** (400 MHz, Chloroform-*d*)  $\delta$  7.52 (d,  $J = 7.8$  Hz, 2H), 7.30 (t,  $J = 7.8$  Hz, 2H), 7.09 (t,  $J = 7.4$  Hz, 1H), 2.38 (q,  $J = 7.5$  Hz, 2H), 1.23 (t,  $J = 7.6$  Hz, 3H).



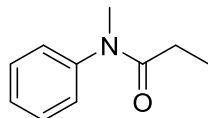

**27**, 24h  
29% yield

**27**: a white solid (7 mg, 29% yield) from **1h'** (0.15 mmol, 24 mg) under standard conditions (PE/EA = 15%);

**<sup>1</sup>H NMR** (400 MHz, Chloroform-*d*)  $\delta$  7.42 (t,  $J = 7.5$  Hz, 2H), 7.34 (t,  $J = 7.2$  Hz, 1H), 7.18 (d,  $J = 7.5$  Hz, 2H), 3.27 (s, 3H), 2.08 (q,  $J = 6.9$  Hz, 2H), 1.05 (t,  $J = 7.4$  Hz, 3H).

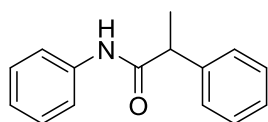

**28**, 24h  
50% yield

**28**: a white solid (17 mg, 50% yield) from **1i'** (0.15 mmol, 34 mg) under standard conditions (PE/EA = 7%);

**<sup>1</sup>H NMR** (400 MHz, Chloroform-*d*)  $\delta$  7.42 – 7.37 (m, 5H), 7.33 – 7.28 (m, 2H), 7.26 – 7.25 (m, 1H), 7.08 – 7.05 (m, 2H), 3.72 (q,  $J = 7.1$  Hz, 1H), 1.65 (*br s*, 1H), 1.60 (d,  $J = 7.1$  Hz, 3H).

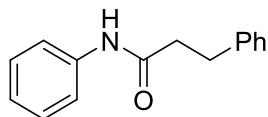

**29**, 24h  
50% yield

**29**: a white solid (17 mg, 50% yield) from **1j'** (0.15 mmol, 34 mg) under standard conditions (PE/EA = 8%);

**<sup>1</sup>H NMR** (400 MHz, Chloroform-*d*)  $\delta$  7.42 (d,  $J = 7.7$  Hz, 2H), 7.31 – 7.28 (m, 4H), 7.25 – 7.20 (m, 3H), 7.11 – 7.07 (m, 2H), 3.05 (t,  $J = 7.4$  Hz, 2H), 2.65 (t,  $J = 7.5$  Hz, 2H).

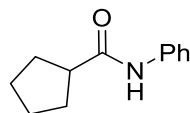

**30**, 72h  
32% yield

**30:** a white solid (9 mg, 32% yield) from **1k'** (0.15 mmol, 28 mg) under standard conditions (PE/EA = 8%);

**m.p.** 154.9 – 155.5 °C;

**IR** (neat)  $\nu$  2922, 1654, 1439, 1244, 1080, 908, 753, 542  $\text{cm}^{-1}$ ;

**$^1\text{H}$  NMR** (400 MHz, Chloroform-*d*)  $\delta$  7.53 (d,  $J = 7.9$  Hz, 2H), 7.31 (t,  $J = 7.8$  Hz, 3H), 7.09 (t,  $J = 7.3$  Hz, 1H), 2.68 (p,  $J = 8.0$  Hz, 1H), 1.95 – 1.87 (m, 4H), 1.82 – 1.75 (m, 2H), 1.65 – 1.59 (m, 2H);

**$^{13}\text{C}$  NMR** (100 MHz, Chloroform-*d*)  $\delta$  173.7, 137.1, 127.9, 123.0, 118.6, 45.8, 29.5, 25.0;

**HRMS** (ESI):  $\text{C}_{12}\text{H}_{15}\text{NNaO}^+$ ,  $[\text{M}+\text{Na}]^+$  Calcd 212.1046, Found 212.1059.

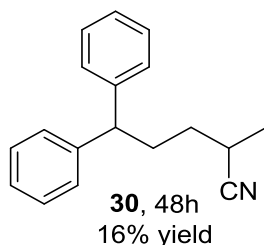

**31:** colorless oil (6 mg, 16% yield) from **1l'** (0.15 mmol, 27 mg) under standard conditions (PE/EA = 2%);

**IR** (neat)  $\nu$  2927, 2238, 1646, 1599, 1451, 1074, 748, 550  $\text{cm}^{-1}$ ;

**$^1\text{H}$  NMR** (400 MHz, Chloroform-*d*)  $\delta$  7.24 – 7.19 (m, 4H), 7.17 – 7.10 (m, 6H), 3.82 (t,  $J = 7.8$  Hz, 1H) 2.52 (dq,  $J = 14.0, 7.0$  Hz, 1H), 2.23 (dtd,  $J = 16.0, 8.1, 5.1$  Hz, 1H) 2.13 – 2.04 (m, 1H) 1.55 – 1.39 (m, 2H), 1.20 (d,  $J = 7.1$  Hz, 3H);

**$^{13}\text{C}$  NMR** (100 MHz, Chloroform-*d*)  $\delta$  144.3, 144.0, 128.64, 128.62, 127.73, 127.70, 126.5, 126.4, 122.8, 51.0, 33.0, 32.6, 25.6, 18.0;

**HRMS** (ESI):  $\text{C}_{18}\text{H}_{19}\text{NNa}^+$ ,  $[\text{M}+\text{Na}]^+$  Calcd 272.1410, Found 272.1417.

#### Reference of knowncompound:

| Entry | Compounds         | Reference |
|-------|-------------------|-----------|
| 8     | <b>2-7, 10-11</b> | 1         |
| 9     | <b>14</b>         | 9         |
| 10    | <b>15</b>         | 10        |
| 11    | <b>16</b>         | 11        |

---

|    |              |    |
|----|--------------|----|
| 12 | <b>18</b>    | 12 |
| 13 | <b>19</b>    | 13 |
| 14 | <b>20-21</b> | 14 |
| 15 | <b>22</b>    | 15 |
| 16 | <b>24</b>    | 16 |
| 17 | <b>25</b>    | 17 |
| 18 | <b>26</b>    | 18 |
| 19 | <b>27</b>    | 19 |
| 20 | <b>28</b>    | 20 |
| 21 | <b>29</b>    | 21 |

---

## 6. Computational Details

All calculations were carried out using DFT as implemented in Gaussian16 software package.<sup>[22]</sup> The PBE hybrid functional<sup>[23]</sup> in conjugation with def2-TZVP basis set for iridium and def2-SVP basis sets for other atoms was applied for the optimization of all stationary points.<sup>[24], [25]</sup> Frequency calculations were performed at the same level to verify the stationary points are minima (0 imaginary frequency) or saddle points (only 1 imaginary frequency). Enthalpy and Gibbs free energy corrections were obtained from frequency calculations at 298 K. Single point energy calculations were carried out with the same hybrid functional using def2-TZVPP basis set for all atoms, and solvation effects of toluene were considered using Truhlar's SMD solvent model during the single point energy calculations.<sup>[26]</sup> Time-dependent DFT (TD-DFT) calculations were performed for the excited state structures. Broken symmetry functional was chosen for open shell systems. Possible conformers for all intermediates and transition states were searched and only the most stable ones were discussed in this paper. Computed structures were illustrated by CYLView<sup>[27]</sup> and GaussView 6.0.<sup>[28]</sup>

## 6.1 Table of energies and other thermodynamic parameters.

**Table S6.** Table of energies and other thermodynamic parameters for PPh<sub>3</sub>-mediated reactions.<sup>a</sup>

| Structure                            | E <sub>ele</sub> | E <sub>ele</sub> (SP) | E(SP)       | H(SP)       | G(SP)       |
|--------------------------------------|------------------|-----------------------|-------------|-------------|-------------|
| <b>PPh<sub>3</sub></b>               | -1034.76890      | -1035.63170           | -1035.34010 | -1035.33916 | -1035.40167 |
| <b>PPh<sub>3</sub><sup>++</sup></b>  | -1034.51475      | -1035.41724           | -1035.12500 | -1035.12406 | -1035.18670 |
| <b>Ir(III)</b>                       | -2937.70014      | -2940.89760           | -2940.15702 | -2940.15607 | -2940.29997 |
| <b>Ir(III)-S1</b>                    |                  | -2940.78560           |             |             |             |
| <b>Ir(III)-T1</b>                    | -2937.60043      | -2940.79698           | -2940.06000 | -2940.05906 | -2940.20456 |
| <b>Ir(II)</b>                        | -2937.85541      | -2941.01777           | -2940.28046 | -2940.27951 | -2940.42464 |
| <b>H<sub>2</sub>O</b>                | -76.27633        | -76.38476             | -76.36034   | -76.35940   | -76.38083   |
| <b>HOAc</b>                          | -228.66765       | -228.94121            | -228.87435  | -228.87340  | -228.90592  |
| <b>1a</b>                            | -555.69621       | -556.29592            | -556.08061  | -556.07967  | -556.12925  |
| <b>I</b>                             | -1110.81113      | -1111.80945           | -1111.48962 | -1111.48868 | -1111.56026 |
| <b>TS1</b>                           | -2145.59924      | -2147.44549           | -2146.83632 | -2146.83537 | -2146.94422 |
| <b>II</b>                            | -1110.41992      | -1111.38917           | -1111.08302 | -1111.08207 | -1111.14751 |
| <b>HPPPh<sub>3</sub><sup>+</sup></b> | -1035.15163      | -1036.05817           | -1035.75560 | -1035.75465 | -1035.81864 |
| <b>TS2</b>                           | -1666.13637      | -1667.69610           | -1667.17544 | -1667.17449 | -1667.26607 |
| <b>III</b>                           | -556.28749       | -556.88726            | -556.66148  | -556.66053  | -556.71164  |
| <b>OPPh<sub>3</sub></b>              | -1109.88617      | -1110.86039           | -1110.56302 | -1110.56208 | -1110.62595 |
| <b>TS3</b>                           | -1591.47268      | -1592.96078           | -1592.43274 | -1592.43179 | -1592.52684 |
| <b>IV</b>                            | -556.67903       | -557.32309            | -557.08311  | -557.08216  | -557.13356  |
| <b>V</b>                             | -556.89556       | -557.49798            | -557.25910  | -557.25816  | -557.30914  |
| <b>TS4</b>                           | -785.58126       | -786.44506            | -786.14189  | -786.14095  | -786.20398  |
| <b>2</b>                             | -556.92330       | -557.52409            | -557.28481  | -557.28387  | -557.33528  |

<sup>a</sup>E<sub>ele</sub> were the electronic energies at PBE1PBE-D3/def2TZVP(Ir)-def2SVP theoretical level. E<sub>ele</sub>(SP) were electronic energies from single point energy calculations at PBE1PBE/def2TZVP-SMD(toluene) theoretical level. E(SP), H(SP), and G(SP) were sum of electronic and thermal energies, sum of electronic and thermal enthalpies, and sum of electronic and thermal free energies, respectively, which were obtained by adding the corresponding corrections from frequency calculations at PBE1PBE-D3/def2TZVP(Ir)-def2SVP level to E<sub>ele</sub>(SP).

## 6.2 Redox potential calculations.

The protonation of pyridine ring in intermediate **III** could decrease the redox potential from -2.18 V to 0.26 V (vs SCE), which facilitate the SET process significantly. Similar phenomenon was also observed in acrylamides, which could help us understand why both vinylpyridines and acrylamides were well-accommodated in this transformation.

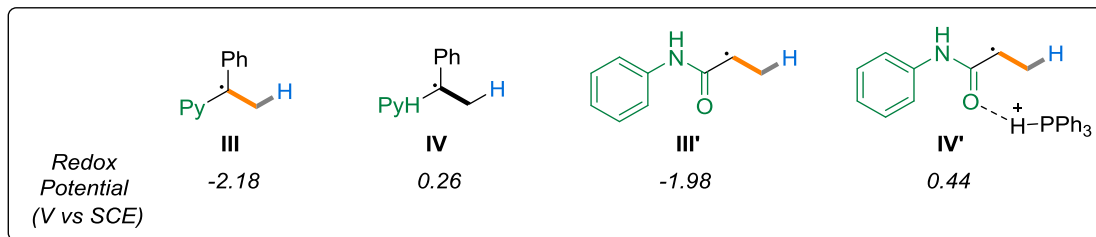

Calculations were performed at PBE1PBE/def2TZVPP-SMD(toluene)/PBE1PBE-D3/def2SVP theoretical level.

### 6.3 Coordinates of all stationary points.

#### Ir(III)

##### 0 imaginary frequency

|   |         |         |         |    |         |         |         |
|---|---------|---------|---------|----|---------|---------|---------|
| C | -2.1197 | -0.1226 | -0.7300 | C  | -4.5094 | 0.6696  | 3.6677  |
| C | -3.2795 | -0.2658 | -1.4849 | C  | -5.2752 | 1.8816  | 3.1109  |
| C | -3.2241 | -0.5017 | -2.8652 | C  | -5.3616 | -0.6014 | 3.5192  |
| C | -1.9458 | -0.5728 | -3.4285 | C  | -4.2257 | 0.9035  | 5.1524  |
| C | -0.8226 | -0.4231 | -2.6252 | H  | -4.6765 | 2.8019  | 3.1894  |
| N | -0.8999 | -0.2109 | -1.3086 | H  | -5.5560 | 1.7472  | 2.0553  |
| H | -4.2483 | -0.1986 | -0.9913 | H  | -6.2038 | 2.0306  | 3.6823  |
| H | -1.8015 | -0.7495 | -4.4936 | H  | -4.8277 | -1.4863 | 3.8979  |
| H | 0.1862  | -0.4828 | -3.0415 | H  | -6.2930 | -0.4948 | 4.0954  |
| C | -2.1198 | 0.1205  | 0.7299  | H  | -5.6434 | -0.7953 | 2.4732  |
| C | -3.2797 | 0.2624  | 1.4848  | H  | -5.1753 | 1.0193  | 5.6945  |
| C | -0.8230 | 0.4226  | 2.6249  | H  | -3.6904 | 0.0564  | 5.6080  |
| C | -3.2245 | 0.4984  | 2.8651  | H  | -3.6403 | 1.8204  | 5.3207  |
| H | -4.2484 | 0.1941  | 0.9912  | Ir | 0.7836  | 0.0005  | -0.0001 |
| C | -1.9463 | 0.5710  | 3.4283  | C  | 2.5434  | 1.1363  | -1.9968 |
| H | 0.1858  | 0.4834  | 3.0412  | C  | 2.2213  | -0.1116 | -1.3900 |
| H | -1.8021 | 0.7479  | 4.4934  | C  | 2.8845  | -1.2632 | -1.8191 |
| N | -0.9001 | 0.2101  | 1.3084  | C  | 3.8443  | -1.1746 | -2.8223 |
| C | -4.5088 | -0.6743 | -3.6678 | C  | 4.1805  | 0.0305  | -3.4329 |
| C | -5.2732 | -1.8872 | -3.1109 | C  | 3.5215  | 1.1689  | -3.0053 |
| C | -5.3625 | 0.5957  | -3.5192 | H  | 2.6860  | -2.2441 | -1.3846 |
| C | -4.2250 | -0.9080 | -5.1524 | H  | 4.9360  | 0.0818  | -4.2165 |
| H | -4.6735 | -2.8068 | -3.1895 | C  | 1.8037  | 2.2834  | -1.4977 |
| H | -5.5541 | -1.7532 | -2.0553 | C  | 1.9479  | 3.6221  | -1.9031 |
| H | -6.2017 | -2.0372 | -3.6823 | C  | 1.1658  | 4.6097  | -1.3319 |
| H | -4.8296 | 1.4812  | -3.8979 | H  | 2.6824  | 3.8707  | -2.6648 |
| H | -6.2938 | 0.4880  | -4.0953 | C  | 0.1341  | 2.9298  | 0.0181  |
| H | -5.6445 | 0.7892  | -2.4732 | C  | 0.2330  | 4.2587  | -0.3514 |
| H | -5.1744 | -1.0248 | -5.6946 | H  | 1.2803  | 5.6515  | -1.6398 |
| H | -3.6906 | -0.0602 | -5.6080 | H  | -0.5692 | 2.6185  | 0.7900  |
| H | -3.6385 | -1.8241 | -5.3208 | N  | 0.8904  | 1.9723  | -0.5325 |
|   |         |         |         | C  | -0.6619 | 5.2954  | 0.2716  |
|   |         |         |         | F  | -1.3276 | 4.7981  | 1.3187  |
|   |         |         |         | F  | -1.5633 | 5.7365  | -0.6073 |
|   |         |         |         | F  | 0.0402  | 6.3460  | 0.6876  |

|   |         |         |         |   |         |         |         |
|---|---------|---------|---------|---|---------|---------|---------|
| F | 3.8415  | 2.3206  | -3.5922 | C | -4.4300 | -1.1694 | -3.5687 |
| F | 4.4643  | -2.2747 | -3.2166 | C | -4.8603 | -2.5040 | -2.9335 |
| C | 2.5447  | -1.1334 | 1.9965  | C | -5.5544 | -0.1318 | -3.4253 |
| C | 2.2212  | 0.1141  | 1.3897  | C | -4.1506 | -1.3954 | -5.0553 |
| C | 2.8833  | 1.2664  | 1.8187  | H | -4.0490 | -3.2470 | -2.9733 |
| C | 3.8432  | 1.1788  | 2.8219  | H | -5.1555 | -2.3844 | -1.8800 |
| C | 4.1807  | -0.0259 | 3.4325  | H | -5.7270 | -2.9126 | -3.4747 |
| C | 3.5228  | -1.1650 | 3.0049  | H | -5.2637 | 0.8351  | -3.8635 |
| H | 2.6838  | 2.2471  | 1.3842  | H | -6.4553 | -0.4845 | -3.9495 |
| H | 4.9363  | -0.0764 | 4.2161  | H | -5.8336 | 0.0397  | -2.3747 |
| C | 1.8061  | -2.2812 | 1.4973  | H | -5.0670 | -1.7442 | -5.5527 |
| C | 1.9517  | -3.6198 | 1.9028  | H | -3.8358 | -0.4694 | -5.5608 |
| C | 1.1707  | -4.6082 | 1.3316  | H | -3.3797 | -2.1642 | -5.2170 |
| H | 2.6865  | -3.8677 | 2.6644  | C | -4.5214 | 0.7387  | 3.6492  |
| C | 0.1371  | -2.9294 | -0.0184 | C | -5.3310 | 1.9168  | 3.0821  |
| C | 0.2375  | -4.2582 | 0.3511  | C | -5.3289 | -0.5631 | 3.5168  |
| H | 1.2862  | -5.6500 | 1.6395  | C | -4.2419 | 0.9982  | 5.1304  |
| H | -0.5664 | -2.6189 | -0.7902 | H | -4.7661 | 2.8589  | 3.1511  |
| N | 0.8925  | -1.9711 | 0.5322  | H | -5.6086 | 1.7625  | 2.0283  |
| F | 3.8441  | -2.3164 | 3.5918  | H | -6.2635 | 2.0375  | 3.6538  |
| F | 4.4620  | 2.2796  | 3.2161  | H | -4.7628 | -1.4249 | 3.9018  |
| C | -0.6564 | -5.2958 | -0.2718 | H | -6.2613 | -0.4835 | 4.0957  |
| F | 0.0466  | -6.3460 | -0.6874 | H | -5.6075 | -0.7769 | 2.4739  |
| F | -1.5576 | -5.7375 | 0.6070  | H | -5.1934 | 1.0870  | 5.6741  |
| F | -1.3224 | -4.7994 | -1.3192 | H | -3.6766 | 0.1748  | 5.5933  |

### Ir(III)-T1

#### 0 imaginary frequency

|   |         |         |         |    |         |         |         |
|---|---------|---------|---------|----|---------|---------|---------|
| C | -2.1177 | -0.0416 | -0.7408 | Ir | 0.7852  | 0.1635  | -0.0380 |
| C | -3.2553 | -0.4016 | -1.4554 | C  | 2.6224  | 1.2948  | -1.9623 |
| C | -3.1926 | -0.6779 | -2.8278 | C  | 2.2169  | 0.0379  | -1.4286 |
| C | -1.9428 | -0.5144 | -3.4352 | C  | 2.8020  | -1.1328 | -1.9148 |
| C | -0.8397 | -0.1612 | -2.6690 | C  | 3.7746  | -1.0534 | -2.9061 |
| N | -0.9132 | 0.0427  | -1.3510 | C  | 4.1958  | 0.1596  | -3.4452 |
| H | -4.2034 | -0.5055 | -0.9290 | C  | 3.6115  | 1.3161  | -2.9600 |
| H | -1.8004 | -0.6868 | -4.5012 | H  | 2.5292  | -2.1174 | -1.5323 |
| H | 0.1544  | -0.0715 | -3.1137 | H  | 4.9603  | 0.2030  | -4.2207 |
| C | -2.1214 | 0.2272  | 0.7135  | C  | 1.9504  | 2.4603  | -1.4094 |
| C | -3.2846 | 0.3471  | 1.4676  | C  | 2.1758  | 3.8051  | -1.7518 |
| C | -0.8318 | 0.6047  | 2.5988  | C  | 1.4424  | 4.8078  | -1.1431 |
| C | -3.2337 | 0.6019  | 2.8445  | H  | 2.9299  | 4.0464  | -2.4965 |
| H | -4.2510 | 0.2530  | 0.9734  | C  | 0.2969  | 3.1294  | 0.1141  |
| C | -1.9570 | 0.7241  | 3.4039  | C  | 0.4781  | 4.4664  | -0.1900 |
| H | 0.1762  | 0.7071  | 3.0098  | H  | 1.6136  | 5.8539  | -1.4073 |
| H | -1.8168 | 0.9168  | 4.4667  | H  | -0.4414 | 2.8204  | 0.8540  |
| N | -0.9053 | 0.3683  | 1.2868  | N  | 1.0085  | 2.1585  | -0.4704 |
|   |         |         |         | C  | -0.3297 | 5.5291  | 0.5053  |
|   |         |         |         | F  | -1.2954 | 4.9914  | 1.2568  |

|   |         |         |         |   |        |         |         |
|---|---------|---------|---------|---|--------|---------|---------|
| F | -0.9010 | 6.3451  | -0.3785 | H | 1.6546 | 1.5967  | -4.3189 |
| F | 0.4397  | 6.2712  | 1.2996  | N | 0.8057 | 0.5901  | -1.2283 |
| F | 4.0154  | 2.4731  | -3.4792 | C | 4.5146 | -0.9693 | 3.5153  |
| F | 4.3239  | -2.1673 | -3.3587 | C | 5.1404 | -2.1853 | 2.8121  |
| C | 2.3900  | -1.2115 | 1.9332  | C | 5.4926 | 0.2137  | 3.4717  |
| C | 2.1726  | 0.1368  | 1.3723  | C | 4.2612 | -1.3319 | 4.9804  |
| C | 2.9170  | 1.2081  | 1.8575  | H | 4.4382 | -3.0333 | 2.7932  |
| C | 3.8440  | 1.0096  | 2.8737  | H | 5.4092 | -1.9549 | 1.7703  |
| C | 4.0743  | -0.2680 | 3.4454  | H | 6.0562 | -2.5058 | 3.3350  |
| C | 3.3657  | -1.3378 | 2.9817  | H | 5.0616 | 1.0991  | 3.9641  |
| H | 2.8021  | 2.2159  | 1.4554  | H | 6.4299 | -0.0450 | 3.9899  |
| H | 4.8091  | -0.3941 | 4.2417  | H | 5.7511 | 0.4962  | 2.4404  |
| C | 1.6273  | -2.2508 | 1.3810  | H | 5.2149 | -1.5712 | 5.4753  |
| C | 1.6573  | -3.6436 | 1.7193  | H | 3.7986 | -0.4991 | 5.5322  |
| C | 0.8369  | -4.5414 | 1.0977  | H | 3.6096 | -2.2136 | 5.0765  |
| H | 2.3541  | -3.9753 | 2.4860  | C | 4.3791 | 1.6490  | -3.4744 |
| C | -0.0503 | -2.7099 | -0.2320 | C | 5.0175 | 2.8701  | -2.7936 |
| C | -0.0574 | -4.0617 | 0.0899  | C | 5.3712 | 0.4763  | -3.4660 |
| H | 0.8643  | -5.6008 | 1.3562  | C | 4.0724 | 2.0108  | -4.9295 |
| H | -0.7126 | -2.3452 | -1.0165 | H | 4.3175 | 3.7197  | -2.7747 |
| N | 0.7363  | -1.8207 | 0.3592  | H | 5.3058 | 2.6515  | -1.7546 |
| F | 3.5873  | -2.5341 | 3.5218  | H | 5.9240 | 3.1837  | -3.3362 |
| F | 4.5441  | 2.0278  | 3.3423  | H | 4.9315 | -0.4143 | -3.9409 |
| C | -0.9964 | -4.9970 | -0.6051 | H | 6.2860 | 0.7437  | -4.0189 |
| F | -0.3409 | -5.9871 | -1.2109 | H | 5.6688 | 0.1983  | -2.4440 |
| F | -1.8473 | -5.5579 | 0.2585  | H | 5.0041 | 2.2777  | -5.4514 |
| F | -1.7283 | -4.3637 | -1.5359 | H | 3.6166 | 1.1682  | -5.4719 |

### Ir(II)

#### 0 imaginary frequency

|   |         |         |         |    |         |         |         |
|---|---------|---------|---------|----|---------|---------|---------|
| C | 2.0745  | 0.0866  | 0.7321  | Ir | -0.8085 | 0.0377  | 0.0313  |
| C | 3.2567  | -0.1803 | 1.4726  | C  | -2.7128 | 0.7739  | 2.0866  |
| C | 3.2205  | -0.6034 | 2.7850  | C  | -2.2304 | -0.3710 | 1.3860  |
| C | 1.9371  | -0.7293 | 3.3882  | C  | -2.7614 | -1.6260 | 1.7071  |
| C | 0.8107  | -0.4820 | 2.6281  | C  | -3.7335 | -1.7363 | 2.6909  |
| N | 0.8474  | -0.1117 | 1.3419  | C  | -4.2202 | -0.6349 | 3.3923  |
| H | 4.2155  | -0.0794 | 0.9630  | C  | -3.6978 | 0.6051  | 3.0724  |
| H | 1.8115  | -1.0336 | 4.4252  | H  | -2.4332 | -2.5343 | 1.1984  |
| H | -0.1888 | -0.6050 | 3.0544  | H  | -4.9837 | -0.7399 | 4.1622  |
| C | 2.0497  | 0.5076  | -0.6285 | C  | -2.1124 | 2.0389  | 1.6946  |
| C | 3.1993  | 0.8539  | -1.3870 | C  | -2.4078 | 3.3105  | 2.2169  |
| C | 0.7234  | 0.9649  | -2.5106 | C  | -1.7445 | 4.4268  | 1.7422  |
| C | 3.1159  | 1.2551  | -2.7046 | H  | -3.1596 | 3.4021  | 2.9963  |
| H | 4.1711  | 0.8157  | -0.8935 | C  | -0.5241 | 3.0002  | 0.2590  |
| C | 1.8173  | 1.3011  | -3.2845 | C  | -0.7791 | 4.2716  | 0.7427  |
| H | -0.2872 | 0.9981  | -2.9275 | H  | -1.9688 | 5.4164  | 2.1465  |
|   |         |         |         | H  | 0.2223  | 2.8258  | -0.5164 |
|   |         |         |         | N  | -1.1710 | 1.9203  | 0.7138  |



|   |         |         |         |
|---|---------|---------|---------|
| C | -0.0474 | 5.4640  | 0.1983  |
| F | 0.9205  | 5.1119  | -0.6483 |
| F | 0.5081  | 6.1779  | 1.1826  |
| F | -0.8785 | 6.2839  | -0.4542 |
| F | -4.1683 | 1.6587  | 3.7483  |
| F | -4.2277 | -2.9344 | 2.9864  |
| C | -2.3113 | -1.1800 | -2.1241 |
| C | -2.2215 | 0.0421  | -1.3933 |
| C | -3.0778 | 1.0943  | -1.7394 |
| C | -3.9854 | 0.9375  | -2.7772 |
| C | -4.0909 | -0.2431 | -3.5096 |
| C | -3.2478 | -1.2840 | -3.1645 |
| H | -3.0567 | 2.0484  | -1.2094 |
| H | -4.8089 | -0.3493 | -4.3219 |
| C | -1.3957 | -2.2276 | -1.7003 |
| C | -1.2777 | -3.5183 | -2.2468 |
| C | -0.3515 | -4.4080 | -1.7341 |
| H | -1.9188 | -3.8034 | -3.0766 |
| C | 0.3051  | -2.7283 | -0.1633 |
| C | 0.4603  | -4.0072 | -0.6687 |
| H | -0.2521 | -5.4087 | -2.1603 |
| H | 0.9181  | -2.3706 | 0.6635  |
| N | -0.5916 | -1.8673 | -0.6587 |
| F | -3.3543 | -2.4147 | -3.8705 |
| F | -4.7906 | 1.9461  | -3.0960 |
| C | 1.4677  | -4.9475 | -0.0727 |
| F | 0.8696  | -5.9478 | 0.5833  |
| F | 2.2260  | -5.5045 | -1.0221 |
| F | 2.2781  | -4.3292 | 0.7885  |

### H<sub>2</sub>O

#### 0 imaginary frequency

|   |        |         |         |
|---|--------|---------|---------|
| O | 0.0000 | 0.0000  | 0.1199  |
| H | 0.0000 | 0.7542  | -0.4788 |
| H | 0.0000 | -0.7542 | -0.4788 |

### HOAc

#### 0 imaginary frequency

|   |         |         |         |
|---|---------|---------|---------|
| C | -0.9812 | 0.3065  | 0.0600  |
| H | -0.1936 | -0.3476 | -0.3420 |
| H | -1.3261 | 1.0028  | -0.7117 |
| H | -1.8075 | -0.3433 | 0.3835  |
| C | -0.4518 | 1.0762  | 1.2329  |
| O | -0.4059 | 2.2735  | 1.3268  |
| O | -0.0171 | 0.2586  | 2.2057  |
| H | 0.3053  | 0.8304  | 2.9193  |

### 1a

#### 0 imaginary frequency

|   |         |         |         |
|---|---------|---------|---------|
| C | -0.5964 | 1.2004  | -0.4137 |
| C | -0.1658 | 2.2005  | 0.4732  |
| C | -1.0999 | 3.0874  | 1.0000  |
| C | -2.4352 | 2.9580  | 0.6312  |
| C | -2.7657 | 1.9394  | -0.2655 |
| N | -1.8830 | 1.0901  | -0.7698 |
| H | -0.7836 | 3.8747  | 1.6892  |
| H | 0.8902  | 2.2844  | 0.7345  |
| H | -3.2050 | 3.6270  | 1.0215  |
| H | -3.8059 | 1.8071  | -0.5874 |
| C | 0.3646  | 0.2478  | -1.0343 |
| C | 0.0198  | -0.4236 | -2.1461 |
| H | 0.7047  | -1.1403 | -2.6050 |
| H | -0.9664 | -0.2732 | -2.5902 |
| C | 1.7022  | 0.0573  | -0.4165 |
| C | 2.8655  | 0.1305  | -1.1949 |
| C | 1.8308  | -0.2411 | 0.9491  |
| C | 4.1195  | -0.0935 | -0.6292 |
| H | 2.7779  | 0.3800  | -2.2553 |
| C | 3.0830  | -0.4673 | 1.5144  |
| H | 0.9331  | -0.3087 | 1.5692  |
| C | 4.2327  | -0.3934 | 0.7273  |
| H | 5.0149  | -0.0267 | -1.2523 |
| H | 3.1618  | -0.7085 | 2.5776  |
| H | 5.2155  | -0.5672 | 1.1723  |

### PPh<sub>3</sub>

#### 0 imaginary frequency

|   |         |        |         |
|---|---------|--------|---------|
| P | -1.0161 | 0.2546 | -0.0130 |
| C | -0.1359 | 1.1081 | -1.3875 |
| C | -0.6760 | 0.9660 | -2.6743 |
| C | 1.0183  | 1.8840 | -1.2214 |
| C | -0.0646 | 1.5660 | -3.7725 |
| H | -1.5868 | 0.3758 | -2.8147 |
| C | 1.6221  | 2.4958 | -2.3201 |
| H | 1.4495  | 2.0098 | -0.2251 |
| C | 1.0862  | 2.3355 | -3.5970 |
| H | -0.4944 | 1.4408 | -4.7696 |
| H | 2.5214  | 3.1001 | -2.1755 |
| H | 1.5621  | 2.8146 | -4.4563 |
| C | -0.1668 | 0.9598 | 1.4614  |
| C | 0.9225  | 0.3584 | 2.1045  |
| C | -0.6610 | 2.1739 | 1.9607  |

|   |         |         |         |
|---|---------|---------|---------|
| C | 1.5081  | 0.9635  | 3.2165  |
| H | 1.3169  | -0.5904 | 1.7322  |
| C | -0.0670 | 2.7841  | 3.0629  |
| H | -1.5218 | 2.6454  | 1.4767  |
| C | 1.0190  | 2.1780  | 3.6956  |
| H | 2.3565  | 0.4820  | 3.7098  |
| H | -0.4603 | 3.7330  | 3.4364  |
| H | 1.4804  | 2.6507  | 4.5662  |
| C | -0.2744 | -1.4295 | -0.0925 |
| C | -0.8767 | -2.4277 | 0.6877  |
| C | 0.8343  | -1.7647 | -0.8799 |
| C | -0.3695 | -3.7249 | 0.6981  |
| H | -1.7534 | -2.1821 | 1.2948  |
| C | 1.3332  | -3.0675 | -0.8791 |
| H | 1.3125  | -1.0006 | -1.4977 |
| C | 0.7367  | -4.0486 | -0.0884 |
| H | -0.8465 | -4.4900 | 1.3159  |
| H | 2.1980  | -3.3155 | -1.4999 |
| H | 1.1303  | -5.0681 | -0.0885 |

**PPh<sub>3</sub><sup>+</sup>**

**0 imaginary frequency**

|   |         |         |         |
|---|---------|---------|---------|
| P | -0.3302 | 0.2222  | -0.0118 |
| C | 0.1704  | 1.1208  | -1.4615 |
| C | -0.3527 | 0.7239  | -2.7089 |
| C | 1.0376  | 2.2261  | -1.3736 |
| C | 0.0143  | 1.4146  | -3.8565 |
| H | -1.0464 | -0.1185 | -2.7772 |
| C | 1.3916  | 2.9086  | -2.5316 |
| H | 1.4468  | 2.5343  | -0.4089 |
| C | 0.8833  | 2.5056  | -3.7686 |
| H | -0.3867 | 1.1087  | -4.8251 |
| H | 2.0755  | 3.7578  | -2.4703 |
| H | 1.1644  | 3.0491  | -4.6736 |
| C | 0.1225  | 0.9977  | 1.5223  |
| C | 0.8817  | 0.3148  | 2.4911  |
| C | -0.3297 | 2.3100  | 1.7675  |
| C | 1.2010  | 0.9553  | 3.6828  |
| H | 1.2361  | -0.7011 | 2.3028  |
| C | 0.0015  | 2.9366  | 2.9619  |
| H | -0.9409 | 2.8339  | 1.0275  |
| C | 0.7637  | 2.2607  | 3.9186  |
| H | 1.8021  | 0.4348  | 4.4314  |
| H | -0.3447 | 3.9543  | 3.1546  |
| H | 1.0168  | 2.7559  | 4.8589  |
| C | 0.0074  | -1.5217 | -0.0779 |

|   |         |         |         |
|---|---------|---------|---------|
| C | -0.5690 | -2.3522 | 0.9044  |
| C | 0.7980  | -2.0756 | -1.1023 |
| C | -0.3298 | -3.7199 | 0.8713  |
| H | -1.2043 | -1.9281 | 1.6868  |
| C | 1.0242  | -3.4470 | -1.1228 |
| H | 1.2484  | -1.4344 | -1.8632 |
| C | 0.4636  | -4.2669 | -0.1408 |
| H | -0.7724 | -4.3664 | 1.6320  |
| H | 1.6488  | -3.8796 | -1.9072 |
| H | 0.6442  | -5.3441 | -0.1657 |

**I**

**0 imaginary frequency**

|   |          |         |         |
|---|----------|---------|---------|
| O | -5.9540  | -0.1551 | 2.0349  |
| H | -6.1497  | 0.4535  | 1.3126  |
| P | -6.4314  | -2.9430 | 1.5406  |
| H | -5.9936  | 0.3854  | 2.8327  |
| C | -4.7616  | -3.4282 | 1.9319  |
| C | -4.4368  | -4.7803 | 2.1503  |
| C | -3.7694  | -2.4324 | 2.0187  |
| C | -3.1205  | -5.1285 | 2.4321  |
| H | -5.2038  | -5.5547 | 2.0796  |
| C | -2.4584  | -2.8005 | 2.2976  |
| H | -4.0469  | -1.3838 | 1.8860  |
| C | -2.1336  | -4.1433 | 2.5045  |
| H | -2.8614  | -6.1777 | 2.5896  |
| H | -1.6841  | -2.0332 | 2.3650  |
| H | -1.1019  | -4.4247 | 2.7282  |
| C | -7.6191  | -4.2321 | 1.8536  |
| C | -8.5091  | -4.6752 | 0.8576  |
| C | -7.6848  | -4.7748 | 3.1530  |
| C | -9.4347  | -5.6680 | 1.1591  |
| H | -8.4610  | -4.2609 | -0.1518 |
| C | -8.6122  | -5.7687 | 3.4375  |
| H | -7.0103  | -4.4182 | 3.9363  |
| C | -9.4876  | -6.2140 | 2.4433  |
| H | -10.1161 | -6.0244 | 0.3836  |
| H | -8.6607  | -6.1938 | 4.4423  |
| H | -10.2191 | -6.9922 | 2.6729  |
| C | -6.6037  | -2.2145 | -0.0780 |
| C | -5.5443  | -2.2416 | -0.9991 |
| C | -7.8095  | -1.5650 | -0.3999 |
| C | -5.7055  | -1.6410 | -2.2446 |
| H | -4.6053  | -2.7396 | -0.7471 |
| C | -7.9569  | -0.9717 | -1.6483 |
| H | -8.6261  | -1.5214 | 0.3260  |

|   |         |         |         |
|---|---------|---------|---------|
| C | -6.9066 | -1.0094 | -2.5696 |
| H | -4.8881 | -1.6709 | -2.9683 |
| H | -8.8935 | -0.4716 | -1.9045 |
| H | -7.0262 | -0.5395 | -3.5486 |

**TS1**

**1 imaginary frequency, -580.0i**

|   |         |         |         |
|---|---------|---------|---------|
| O | -1.1483 | 4.2213  | -6.6100 |
| H | -0.3153 | 5.1013  | -5.9281 |
| H | -1.0505 | 4.4002  | -7.5591 |
| P | -0.6927 | 2.2475  | -6.3299 |
| P | 0.5377  | 6.0420  | -4.9933 |
| C | -2.0113 | 1.6018  | -7.3874 |
| C | -3.1383 | 2.3867  | -7.6906 |
| C | -1.9205 | 0.3001  | -7.9066 |
| C | -4.1514 | 1.8717  | -8.4941 |
| H | -3.2156 | 3.3994  | -7.2920 |
| C | -2.9363 | -0.2017 | -8.7162 |
| H | -1.0561 | -0.3258 | -7.6765 |
| C | -4.0525 | 0.5798  | -9.0112 |
| H | -5.0249 | 2.4875  | -8.7208 |
| H | -2.8542 | -1.2149 | -9.1161 |
| H | -4.8475 | 0.1815  | -9.6458 |
| C | 0.6301  | 0.9734  | -6.3493 |
| C | 1.5277  | 1.0114  | -7.4286 |
| C | 0.8123  | 0.0196  | -5.3362 |
| C | 2.5798  | 0.1024  | -7.5032 |
| H | 1.3995  | 1.7583  | -8.2183 |
| C | 1.8724  | -0.8822 | -5.4124 |
| H | 0.1199  | -0.0279 | -4.4930 |
| C | 2.7561  | -0.8429 | -6.4913 |
| H | 3.2674  | 0.1340  | -8.3516 |
| H | 2.0038  | -1.6276 | -4.6243 |
| H | 3.5847  | -1.5528 | -6.5448 |
| C | -1.2355 | 2.3232  | -4.6039 |
| C | -0.2809 | 2.5317  | -3.5961 |
| C | -2.5866 | 2.1959  | -4.2575 |
| C | -0.6732 | 2.5973  | -2.2625 |
| H | 0.7785  | 2.6286  | -3.8468 |
| C | -2.9722 | 2.2639  | -2.9202 |
| H | -3.3386 | 2.0237  | -5.0307 |
| C | -2.0187 | 2.4622  | -1.9224 |
| H | 0.0770  | 2.7600  | -1.4858 |
| H | -4.0265 | 2.1506  | -2.6570 |
| H | -2.3246 | 2.5114  | -0.8749 |
| C | -0.2572 | 5.9845  | -3.3717 |

|   |         |         |         |
|---|---------|---------|---------|
| C | -1.6504 | 5.8307  | -3.3544 |
| C | 0.4527  | 6.1245  | -2.1739 |
| C | -2.3305 | 5.8420  | -2.1395 |
| H | -2.1993 | 5.6846  | -4.2891 |
| C | -0.2352 | 6.1240  | -0.9627 |
| H | 1.5406  | 6.2255  | -2.1832 |
| C | -1.6244 | 5.9912  | -0.9461 |
| H | -3.4158 | 5.7213  | -2.1252 |
| H | 0.3162  | 6.2323  | -0.0260 |
| H | -2.1597 | 5.9971  | 0.0064  |
| C | 0.6079  | 7.7757  | -5.5149 |
| C | 1.3473  | 8.0996  | -6.6622 |
| C | -0.0873 | 8.7744  | -4.8237 |
| C | 1.3899  | 9.4165  | -7.1093 |
| H | 1.9025  | 7.3259  | -7.2005 |
| C | -0.0397 | 10.0911 | -5.2802 |
| H | -0.6608 | 8.5278  | -3.9269 |
| C | 0.6957  | 10.4123 | -6.4195 |
| H | 1.9697  | 9.6684  | -8.0001 |
| H | -0.5791 | 10.8705 | -4.7374 |
| H | 0.7318  | 11.4455 | -6.7724 |
| C | 2.2401  | 5.4421  | -4.8984 |
| C | 2.5282  | 4.1617  | -5.3898 |
| C | 3.2647  | 6.2267  | -4.3498 |
| C | 3.8231  | 3.6550  | -5.3047 |
| H | 1.7441  | 3.5581  | -5.8539 |
| C | 4.5570  | 5.7145  | -4.2675 |
| H | 3.0557  | 7.2423  | -4.0024 |
| C | 4.8348  | 4.4293  | -4.7378 |
| H | 4.0362  | 2.6548  | -5.6898 |
| H | 5.3554  | 6.3245  | -3.8389 |
| H | 5.8514  | 4.0346  | -4.6713 |

**II**

**0 imaginary frequency**

|   |         |        |         |
|---|---------|--------|---------|
| O | 0.1021  | 2.7863 | -6.3899 |
| H | 0.5933  | 2.6409 | -7.2103 |
| P | -0.9136 | 1.4825 | -6.1155 |
| C | -1.6435 | 2.0932 | -4.5807 |
| C | -1.5405 | 3.4365 | -4.1875 |
| C | -2.4628 | 1.2209 | -3.8453 |
| C | -2.2433 | 3.8908 | -3.0725 |
| H | -0.9007 | 4.1147 | -4.7533 |
| C | -3.1431 | 1.6767 | -2.7223 |
| H | -2.5602 | 0.1786 | -4.1618 |
| C | -3.0398 | 3.0162 | -2.3357 |

|   |         |         |          |
|---|---------|---------|----------|
| H | -2.1592 | 4.9385  | -2.7725  |
| H | -3.7669 | 0.9865  | -2.1494  |
| H | -3.5848 | 3.3766  | -1.4598  |
| C | -0.2152 | -0.1008 | -5.8711  |
| C | 0.2903  | -0.4716 | -4.5885  |
| C | 0.0453  | -0.9831 | -6.9630  |
| C | 0.9315  | -1.6855 | -4.4072  |
| H | 0.1653  | 0.2048  | -3.7400  |
| C | 0.6853  | -2.1918 | -6.7563  |
| H | -0.2589 | -0.7034 | -7.9742  |
| C | 1.1292  | -2.5678 | -5.4785  |
| H | 1.2931  | -1.9508 | -3.4100  |
| H | 0.8563  | -2.8547 | -7.6088  |
| H | 1.6408  | -3.5202 | -5.3267  |
| C | -2.0081 | 1.5088  | -7.5263  |
| C | -2.2784 | 2.7422  | -8.1597  |
| C | -2.7587 | 0.3749  | -7.9075  |
| C | -3.2415 | 2.8231  | -9.1606  |
| H | -1.7231 | 3.6337  | -7.8606  |
| C | -3.6998 | 0.4647  | -8.9225  |
| H | -2.6030 | -0.5764 | -7.3937  |
| C | -3.9497 | 1.6886  | -9.5574  |
| H | -3.4364 | 3.7854  | -9.6413  |
| H | -4.2607 | -0.4268 | -9.2142  |
| H | -4.7001 | 1.7552  | -10.3484 |

**HPPh<sub>3</sub><sup>+</sup>**

**0 imaginary frequency**

|   |         |         |         |
|---|---------|---------|---------|
| H | 0.7170  | 5.1783  | -5.8477 |
| P | 1.0393  | 6.2493  | -4.9820 |
| C | 0.4419  | 7.7551  | -5.7480 |
| C | -0.8554 | 7.7792  | -6.2826 |
| C | 1.2469  | 8.9014  | -5.7642 |
| C | -1.3413 | 8.9586  | -6.8364 |
| H | -1.4859 | 6.8854  | -6.2689 |
| C | 0.7461  | 10.0767 | -6.3199 |
| H | 2.2590  | 8.8758  | -5.3522 |
| C | -0.5420 | 10.1040 | -6.8535 |
| H | -2.3475 | 8.9846  | -7.2600 |
| H | 1.3677  | 10.9743 | -6.3387 |
| H | -0.9283 | 11.0273 | -7.2917 |
| C | 2.8215  | 6.2693  | -4.7965 |
| C | 3.6269  | 6.1519  | -5.9397 |
| C | 3.3932  | 6.4491  | -3.5304 |
| C | 5.0098  | 6.2131  | -5.8069 |
| H | 3.1819  | 6.0134  | -6.9293 |

|   |         |        |         |
|---|---------|--------|---------|
| C | 4.7801  | 6.5113 | -3.4127 |
| H | 2.7618  | 6.5336 | -2.6422 |
| C | 5.5837  | 6.3935 | -4.5462 |
| H | 5.6443  | 6.1168 | -6.6905 |
| H | 5.2341  | 6.6491 | -2.4292 |
| H | 6.6708  | 6.4389 | -4.4477 |
| C | 0.2200  | 5.9384 | -3.4189 |
| C | 0.2946  | 4.6562 | -2.8536 |
| C | -0.4409 | 6.9793 | -2.7541 |
| C | -0.2995 | 4.4217 | -1.6183 |
| H | 0.8120  | 3.8429 | -3.3706 |
| C | -1.0291 | 6.7306 | -1.5159 |
| H | -0.5018 | 7.9746 | -3.2016 |
| C | -0.9585 | 5.4574 | -0.9516 |
| H | -0.2513 | 3.4253 | -1.1737 |
| H | -1.5483 | 7.5358 | -0.9918 |
| H | -1.4250 | 5.2668 | 0.0177  |

**TS2**

**1 imaginary frequency, -483.6i**

|   |         |         |         |
|---|---------|---------|---------|
| C | -0.3377 | 0.8896  | -1.9311 |
| C | -0.3789 | 2.1773  | -2.5183 |
| C | -1.5983 | 2.7571  | -2.8284 |
| C | -2.7777 | 2.0586  | -2.5465 |
| C | -2.6446 | 0.7923  | -1.9760 |
| N | -1.4890 | 0.2197  | -1.6868 |
| H | -1.6314 | 3.7482  | -3.2885 |
| H | 0.5448  | 2.7148  | -2.7319 |
| H | -3.7628 | 2.4779  | -2.7586 |
| H | -3.5430 | 0.2022  | -1.7518 |
| C | 0.9058  | 0.1905  | -1.5889 |
| C | 0.8613  | -1.1454 | -1.2317 |
| H | 1.7366  | -1.6268 | -0.7882 |
| H | -0.1133 | -1.6274 | -1.1325 |
| C | 2.2099  | 0.8890  | -1.5856 |
| C | 3.3741  | 0.2262  | -2.0201 |
| C | 2.3595  | 2.1954  | -1.0848 |
| C | 4.6184  | 0.8443  | -1.9799 |
| H | 3.2925  | -0.7853 | -2.4227 |
| C | 3.6057  | 2.8166  | -1.0481 |
| H | 1.4888  | 2.7184  | -0.6843 |
| C | 4.7432  | 2.1488  | -1.5012 |
| H | 5.4979  | 0.3052  | -2.3405 |
| H | 3.6898  | 3.8289  | -0.6439 |
| H | 5.7203  | 2.6373  | -1.4724 |

|   |         |         |         |
|---|---------|---------|---------|
| O | 1.4204  | -2.1257 | -3.7769 |
| H | 1.1865  | -1.6827 | -2.8784 |
| P | 1.2464  | -1.2046 | -5.0664 |
| C | 2.4532  | 0.1110  | -5.2110 |
| C | 3.7750  | -0.2239 | -5.5554 |
| C | 2.1474  | 1.4289  | -4.8385 |
| C | 4.7625  | 0.7571  | -5.5514 |
| H | 4.0261  | -1.2520 | -5.8287 |
| C | 3.1372  | 2.4031  | -4.8465 |
| H | 1.1337  | 1.6803  | -4.5245 |
| C | 4.4470  | 2.0697  | -5.2015 |
| H | 5.7884  | 0.4925  | -5.8186 |
| H | 2.8920  | 3.4245  | -4.5480 |
| H | 5.2266  | 2.8349  | -5.1907 |
| C | 1.6153  | -2.3903 | -6.3882 |
| C | 1.6830  | -3.7641 | -6.1256 |
| C | 1.7060  | -1.9246 | -7.7078 |
| C | 1.8517  | -4.6613 | -7.1791 |
| H | 1.6106  | -4.1184 | -5.0956 |
| C | 1.8783  | -2.8256 | -8.7529 |
| H | 1.6484  | -0.8519 | -7.9155 |
| C | 1.9501  | -4.1960 | -8.4898 |
| H | 1.9101  | -5.7328 | -6.9727 |
| H | 1.9571  | -2.4592 | -9.7792 |
| H | 2.0822  | -4.9031 | -9.3124 |
| C | -0.4062 | -0.5906 | -5.1433 |
| C | -1.4220 | -1.3369 | -4.5002 |
| C | -0.7702 | 0.5081  | -5.9588 |
| C | -2.7504 | -0.9711 | -4.6517 |
| H | -1.1583 | -2.1916 | -3.8748 |
| C | -2.1020 | 0.8708  | -6.0787 |
| H | -0.0074 | 1.0724  | -6.4999 |
| C | -3.1023 | 0.1405  | -5.4234 |
| H | -3.5234 | -1.5465 | -4.1372 |
| H | -2.3694 | 1.7335  | -6.6938 |
| H | -4.1504 | 0.4285  | -5.5277 |

### III

#### 0 imaginary frequency

|   |         |        |         |
|---|---------|--------|---------|
| C | -0.9709 | 2.4451 | -1.3088 |
| C | -1.4192 | 1.8628 | -0.0961 |
| C | -2.3695 | 2.5219 | 0.6692  |
| C | -2.8622 | 3.7517 | 0.2318  |
| C | -2.3409 | 4.2705 | -0.9575 |
| N | -1.4326 | 3.6561 | -1.6952 |
| H | -2.7139 | 2.0856 | 1.6105  |

|   |         |         |         |
|---|---------|---------|---------|
| H | -0.9902 | 0.9218  | 0.2502  |
| H | -3.6128 | 4.3048  | 0.7998  |
| H | -2.6846 | 5.2454  | -1.3254 |
| C | 0.0400  | 1.8275  | -2.1459 |
| C | 0.8278  | 2.7099  | -3.0585 |
| H | 1.0709  | 2.2053  | -4.0053 |
| H | 1.7846  | 3.0129  | -2.5927 |
| C | 0.3398  | 0.4069  | -2.1021 |
| C | 1.6363  | -0.0597 | -2.4214 |
| C | -0.6442 | -0.5691 | -1.8162 |
| C | 1.9397  | -1.4157 | -2.4126 |
| H | 2.4225  | 0.6605  | -2.6563 |
| C | -0.3391 | -1.9246 | -1.8196 |
| H | -1.6730 | -0.2535 | -1.6318 |
| C | 0.9564  | -2.3588 | -2.1080 |
| H | 2.9563  | -1.7421 | -2.6462 |
| H | -1.1258 | -2.6536 | -1.6089 |
| H | 1.1948  | -3.4250 | -2.1072 |
| H | 0.2604  | 3.6276  | -3.2597 |

### OPPh<sub>3</sub>

#### 0 imaginary frequency

|   |         |         |         |
|---|---------|---------|---------|
| P | -0.7783 | 0.2417  | -0.0107 |
| C | -0.0245 | 1.0952  | -1.4304 |
| C | -0.8296 | 1.2234  | -2.5679 |
| C | 1.2743  | 1.6163  | -1.4327 |
| C | -0.3281 | 1.8469  | -3.7083 |
| H | -1.8534 | 0.8413  | -2.5337 |
| C | 1.7724  | 2.2377  | -2.5769 |
| H | 1.8938  | 1.5564  | -0.5336 |
| C | 0.9736  | 2.3491  | -3.7151 |
| H | -0.9587 | 1.9475  | -4.5952 |
| H | 2.7859  | 2.6464  | -2.5763 |
| H | 1.3649  | 2.8402  | -4.6096 |
| C | -0.0527 | 0.9958  | 1.4783  |
| C | 1.1997  | 0.6529  | 1.9999  |
| C | -0.8311 | 1.9688  | 2.1154  |
| C | 1.6808  | 1.3004  | 3.1368  |
| H | 1.7946  | -0.1359 | 1.5311  |
| C | -0.3470 | 2.6118  | 3.2525  |
| H | -1.8218 | 2.1966  | 1.7129  |
| C | 0.9100  | 2.2820  | 3.7601  |
| H | 2.6579  | 1.0298  | 3.5445  |
| H | -0.9568 | 3.3702  | 3.7497  |
| H | 1.2875  | 2.7855  | 4.6537  |

|   |         |         |         |
|---|---------|---------|---------|
| C | -0.1626 | -1.4701 | -0.0631 |
| C | -1.0351 | -2.4515 | 0.4210  |
| C | 1.0952  | -1.8363 | -0.5551 |
| C | -0.6401 | -3.7874 | 0.4354  |
| H | -2.0269 | -2.1491 | 0.7676  |
| C | 1.4868  | -3.1741 | -0.5369 |
| H | 1.7650  | -1.0798 | -0.9732 |
| C | 0.6217  | -4.1483 | -0.0382 |
| H | -1.3233 | -4.5526 | 0.8122  |
| H | 2.4683  | -3.4589 | -0.9239 |
| H | 0.9293  | -5.1970 | -0.0286 |
| O | -2.2786 | 0.3160  | -0.0225 |

**TS3**

**1 imaginary frequency, -606.3i**

|   |         |         |         |
|---|---------|---------|---------|
| C | -3.9940 | -1.1116 | 0.7218  |
| C | -2.8483 | -1.9284 | 0.6231  |
| C | -2.6792 | -2.9889 | 1.5012  |
| C | -3.6519 | -3.2439 | 2.4721  |
| C | -4.7642 | -2.4137 | 2.5054  |
| N | -4.9222 | -1.3899 | 1.6684  |
| H | -1.7821 | -3.6098 | 1.4413  |
| H | -2.0836 | -1.6881 | -0.1168 |
| H | -3.5515 | -4.0647 | 3.1837  |
| H | -5.5711 | -2.5760 | 3.2283  |
| C | -4.1891 | 0.0737  | -0.0991 |
| C | -4.7226 | 1.3063  | 0.5600  |
| H | -5.0333 | 1.1041  | 1.5929  |
| H | -5.5692 | 1.7408  | 0.0049  |
| C | -3.8334 | 0.0990  | -1.4963 |
| C | -3.7053 | 1.3297  | -2.1858 |
| C | -3.7006 | -1.0895 | -2.2595 |
| C | -3.4363 | 1.3673  | -3.5469 |
| H | -3.8065 | 2.2702  | -1.6426 |
| C | -3.4391 | -1.0452 | -3.6217 |
| H | -3.8439 | -2.0607 | -1.7808 |
| C | -3.3000 | 0.1828  | -4.2754 |
| H | -3.3288 | 2.3318  | -4.0486 |
| H | -3.3510 | -1.9772 | -4.1850 |
| H | -3.0899 | 0.2156  | -5.3467 |
| H | -6.2954 | -0.9323 | 1.4757  |
| P | -7.8240 | -0.6442 | 1.0728  |
| H | -3.9401 | 2.0842  | 0.6131  |
| C | -7.8591 | 0.2223  | -0.5148 |
| C | -7.1462 | -0.3348 | -1.5867 |
| C | -8.5132 | 1.4500  | -0.6688 |

|   |          |         |         |
|---|----------|---------|---------|
| C | -7.0836  | 0.3376  | -2.8029 |
| H | -6.6260  | -1.2897 | -1.4727 |
| C | -8.4481  | 2.1159  | -1.8922 |
| H | -9.0671  | 1.8878  | 0.1654  |
| C | -7.7325  | 1.5641  | -2.9544 |
| H | -6.5089  | -0.0901 | -3.6277 |
| H | -8.9587  | 3.0738  | -2.0136 |
| H | -7.6769  | 2.0944  | -3.9079 |
| C | -8.6964  | 0.3576  | 2.2982  |
| C | -7.9872  | 1.3377  | 3.0065  |
| C | -10.0691 | 0.1852  | 2.5209  |
| C | -8.6515  | 2.1448  | 3.9266  |
| H | -6.9155  | 1.4747  | 2.8412  |
| C | -10.7252 | 0.9951  | 3.4447  |
| H | -10.6223 | -0.5849 | 1.9771  |
| C | -10.0188 | 1.9734  | 4.1451  |
| H | -8.0984  | 2.9073  | 4.4793  |
| H | -11.7948 | 0.8602  | 3.6199  |
| H | -10.5371 | 2.6048  | 4.8704  |
| C | -8.7267  | -2.2030 | 0.8873  |
| C | -8.6543  | -3.1375 | 1.9309  |
| C | -9.5005  | -2.4794 | -0.2460 |
| C | -9.3514  | -4.3380 | 1.8388  |
| H | -8.0638  | -2.9230 | 2.8265  |
| C | -10.1927 | -3.6866 | -0.3326 |
| H | -9.5634  | -1.7538 | -1.0606 |
| C | -10.1188 | -4.6137 | 0.7056  |
| H | -9.2964  | -5.0629 | 2.6540  |
| H | -10.7963 | -3.9010 | -1.2174 |
| H | -10.6632 | -5.5581 | 0.6334  |

**IV**

**0 imaginary frequency**

|   |         |        |         |
|---|---------|--------|---------|
| C | -0.9282 | 2.4620 | -1.3340 |
| C | -0.9252 | 3.8186 | -0.9288 |
| C | -2.0532 | 4.3908 | -0.3721 |
| C | -3.2289 | 3.6363 | -0.2084 |
| C | -3.2203 | 2.3216 | -0.6230 |
| N | -2.1101 | 1.7879 | -1.1569 |
| H | -2.0290 | 5.4360 | -0.0551 |
| H | -0.0137 | 4.4037 | -1.0452 |
| H | -4.1321 | 4.0651 | 0.2264  |
| H | -4.0892 | 1.6646 | -0.5499 |
| C | 0.1816  | 1.8018 | -1.9381 |
| C | 1.3430  | 2.6234 | -2.3917 |
| H | 1.8975  | 3.0134 | -1.5190 |

|                              |         |         |         |                                        |         |                 |
|------------------------------|---------|---------|---------|----------------------------------------|---------|-----------------|
| H                            | 1.0389  | 3.4901  | -2.9993 | <b>1 imaginary frequency, -1142.9i</b> |         |                 |
| C                            | 0.1874  | 0.3540  | -2.1228 | C                                      | -0.9879 | 2.5256 -1.7846  |
| C                            | 0.6759  | -0.2083 | -3.3215 | C                                      | -2.1197 | 1.8811 -1.2138  |
| C                            | -0.2618 | -0.5240 | -1.1075 | C                                      | -2.9225 | 2.5394 -0.3104  |
| C                            | 0.6775  | -1.5844 | -3.5107 | C                                      | -2.6587 | 3.8796 0.0487   |
| H                            | 1.0262  | 0.4442  | -4.1243 | C                                      | -1.5839 | 4.4901 -0.5477  |
| C                            | -0.2386 | -1.9011 | -1.2968 | N                                      | -0.7959 | 3.8259 -1.4113  |
| H                            | -0.5624 | -0.1259 | -0.1339 | H                                      | -3.7647 | 2.0118 0.1450   |
| C                            | 0.2205  | -2.4354 | -2.5021 | H                                      | -2.3110 | 0.8421 -1.4808  |
| H                            | 1.0403  | -1.9994 | -4.4536 | H                                      | -3.2819 | 4.4209 0.7602   |
| H                            | -0.5607 | -2.5641 | -0.4908 | H                                      | -1.3148 | 5.5341 -0.3714  |
| H                            | 0.2347  | -3.5175 | -2.6507 | C                                      | -0.0587 | 1.9496 -2.7197  |
| H                            | 2.0570  | 2.0230  | -2.9670 | C                                      | 1.4199  | 2.1651 -2.4162  |
| H                            | -2.1329 | 0.8176  | -1.4762 | H                                      | 2.0267  | 1.8889 -3.2916  |
|                              |         |         |         | H                                      | 1.7663  | 1.5578 -1.5608  |
| <b>V</b>                     |         |         |         | C                                      | -0.4259 | 0.6282 -3.2972  |
| <b>0 imaginary frequency</b> |         |         |         | C                                      | 0.4168  | -0.4925 -3.2225 |
| C                            | -0.9298 | 2.4438  | -1.3643 | C                                      | -1.6364 | 0.4808 -4.0016  |
| C                            | -1.8070 | 1.8342  | -0.3840 | C                                      | 0.0563  | -1.7083 -3.8033 |
| C                            | -2.7000 | 2.5640  | 0.3351  | H                                      | 1.3702  | -0.4194 -2.6954 |
| C                            | -2.8149 | 3.9845  | 0.1542  | C                                      | -2.0023 | -0.7333 -4.5732 |
| C                            | -1.9701 | 4.5686  | -0.7336 | H                                      | -2.2896 | 1.3511 -4.1150  |
| N                            | -1.0688 | 3.8365  | -1.4438 | C                                      | -1.1564 | -1.8396 -4.4762 |
| H                            | -3.3280 | 2.0641  | 1.0769  | H                                      | 0.7329  | -2.5636 -3.7248 |
| H                            | -1.7070 | 0.7625  | -0.2148 | H                                      | -2.9480 | -0.8125 -5.1159 |
| H                            | -3.5313 | 4.5825  | 0.7160  | H                                      | -1.4366 | -2.7924 -4.9319 |
| H                            | -1.9597 | 5.6437  | -0.9257 | H                                      | 1.6483  | 3.2165 -2.1946  |
| C                            | 0.0172  | 1.8110  | -2.1330 | H                                      | -0.1193 | 4.3922 -2.0166  |
| C                            | 0.9440  | 2.6471  | -2.9759 | C                                      | 0.6688  | 5.7437 -5.4982  |
| H                            | 1.6372  | 2.0192  | -3.5506 | H                                      | 1.5152  | 5.3142 -6.0551  |
| H                            | 1.5588  | 3.3506  | -2.3810 | H                                      | 0.9317  | 6.7453 -5.1386  |
| C                            | 0.1714  | 0.3471  | -2.1565 | H                                      | -0.1815 | 5.7908 -6.1931  |
| C                            | 1.4491  | -0.2430 | -2.0960 | C                                      | 0.3344  | 4.8344 -4.3442  |
| C                            | -0.9303 | -0.5206 | -2.2872 | O                                      | 0.5232  | 5.2194 -3.1792  |
| C                            | 1.6148  | -1.6243 | -2.1389 | O                                      | -0.1270 | 3.6876 -4.6788  |
| H                            | 2.3286  | 0.3982  | -1.9924 | H                                      | -0.1812 | 2.8883 -3.7875  |
| C                            | -0.7664 | -1.9031 | -2.3208 |                                        |         |                 |
| H                            | -1.9307 | -0.0941 | -2.3947 | <b>2</b>                               |         |                 |
| C                            | 0.5073  | -2.4661 | -2.2449 | <b>0 imaginary frequency</b>           |         |                 |
| H                            | 2.6206  | -2.0490 | -2.0798 | C                                      | -1.1961 | 2.4078 -1.5355  |
| H                            | -1.6436 | -2.5471 | -2.4277 | C                                      | -2.5283 | 2.2984 -1.1157  |
| H                            | 0.6368  | -3.5505 | -2.2772 | C                                      | -2.9291 | 2.9537 0.0434   |
| H                            | 0.3927  | 3.2523  | -3.7231 | C                                      | -1.9889 | 3.6987 0.7522   |
| H                            | -0.4644 | 4.3225  | -2.0914 | C                                      | -0.6873 | 3.7464 0.2567   |
|                              |         |         |         | N                                      | -0.3005 | 3.1231 -0.8526  |
| <b>TS4</b>                   |         |         |         | H                                      | -3.9637 | 2.8850 0.3897   |

---

|   |         |         |         |   |         |         |         |
|---|---------|---------|---------|---|---------|---------|---------|
| H | -3.2356 | 1.7016  | -1.6964 | H | 1.3418  | 1.1649  | -1.0526 |
| H | -2.2550 | 4.2323  | 1.6670  | C | -0.0553 | -2.0847 | -2.6432 |
| H | 0.0831  | 4.3207  | 0.7850  | H | -1.4537 | -0.7968 | -3.6641 |
| C | -0.7137 | 1.6795  | -2.7757 | C | 1.0138  | -2.1577 | -1.7528 |
| C | 0.2662  | 2.5226  | -3.5910 | H | 2.3533  | -1.0346 | -0.4831 |
| H | 0.5873  | 1.9747  | -4.4890 | H | -0.4586 | -2.9959 | -3.0926 |
| H | 1.1534  | 2.7675  | -2.9911 | H | 1.4537  | -3.1254 | -1.4991 |
| C | -0.1163 | 0.3326  | -2.4031 | H | -0.1987 | 3.4703  | -3.9032 |
| C | 0.9576  | 0.2479  | -1.5072 | H | -1.6013 | 1.4769  | -3.3967 |
| C | -0.6147 | -0.8475 | -2.9634 |   |         |         |         |
| C | 1.5172  | -0.9860 | -1.1855 |   |         |         |         |



---

**Reference:**

1. H. Yang, E. Wang, P. Yang, H. Lv and X. Zhang, Pyridine-Directed Asymmetric Hydrogenation of 1,1-Diarylalkenes, *Org. Lett.*, 2017, **19**, 5062-5065.
2. M. Chaitanya and P. Anbarasan, Rhodium-Catalyzed Cyanation of C(sp<sup>2</sup>)-H Bond of Alkenes, *Org. Lett.*, 2015, **17**, 3766-3769.
3. Z. Z. Xie, Y. Zheng, C. P. Yuan, J. P. Guan, Z. P. Ye, J. A. Xiao, H. Y. Xiang, K. Chen, X. Q. Chen and H. Yang, Photoredox-Catalyzed Deoxygenation of Hexafluoroacetone Hydrate Enables Hydroxypolyfluoroalkylation of Alkenes, *Angew. Chem. Int. Ed.*, 2022, **61**, DOI: 10.1002/anie.202211035.
4. Y. Cao, H. Zhao, D. Zhang-Negrerie, Y. Du and K. Zhao, Metal-Free Synthesis of 3-Arylquinolin-2-Ones from N,2-Diaryl- Acrylamides via Phenyliodine(III) Bis(2,2-Dimethylpropanoate)- Mediated Direct Oxidative C–C Bond Formation, *Adv. Synth. Catal.*, 2016, **358**, 3610-3615.
5. D. N. Zakusilo, D. S. Ryabukhin, I. A. Boyarskaya, O. S. Yuzikhin and A. V. Vasilyev, Tandem Superelectrophilic Hydroarylation of C=C Bond and Carbonyl Reduction in Cinnamides: Synthetic Rout to 3,3-Diarylpropylamines, Valuable Pharmaceuticals, *Tetrahedron.*, 2015, **71**, 102-108.
6. Y.-W. Huo, L. Yao, X. Qi and X.-F. Wu, Nickel-Catalyzed Reductive Aminocarbonylation of Vinyl Triflates with Nitro Compounds for the Synthesis of  $\alpha,\beta$ -Unsaturated Amides, *Org. Chem. Front.*, 2021, **8**, 6974-6978.
7. C. Chang, H. Zhang, X. Wu and C. Zhu, Radical Trifunctionalization of Hexenenitrile via Remote Cyano Migration, *Chem. Commun.*, 2022, **58**, 1005-1008.
8. M. L. Czyz, M. S. Taylor, T. H. Horngren and A. Polyzos, Reductive Activation and Hydrofunctionalization of Olefins by Multiphoton Tandem Photoredox Catalysis, *ACS Catal.*, 2021, **11**, 5472-5480.
9. C. A. Blakemore, S. P. France, L. Samp, D. M. Nason, E. Yang, R. M. Howard, K. J. Coffman, Q. Yang, A. C. Smith, E. Evrard, W. Li, L. Dai, L. Yang, Z. Chen, Q. Zhang, F. He and J. Zhang, Scalable, Telescoped Hydrogenolysis-Enzymatic Decarboxylation Process for the Asymmetric Synthesis of (R)- $\alpha$ -Heteroaryl Propionic Acids, *Org. Process. Res. Dev.*, 2021, **25**, 421-426.
10. A. M. Bergmann, A. M. Oldham, W. You and M. K. Brown, Copper-Catalyzed Cross-Coupling of Aryl-, Primary Alkyl-, and Secondary Alkylboranes with Heteroaryl Bromides, *Chem. Commun.*, 2018, **54**, 5381-5384.
11. J. Llaveria, D. Leonori, and V. K. Aggarwal, Stereospecific Coupling of Boronic Esters with N-Heteroaromatic Compounds, *J. Am. Chem. Soc.*, 2005, **127**, 10958-10961.
12. T. Liu, Y. Zeng, H. Zhang, T. Wei, X. Wu and N. Li, Facile Pd-Catalyzed Chemoselective Transfer Hydrogenation of Olefins Using Formic Acid in Water, *Tetrahedron Letters.*, 2016, **57**, 4845-4849.
13. Y. Nakao, Y. Yamada, N. Kashihara and T. Hiyama, Selective C-4 Alkylation of Pyridine by Nickel/Lewis Acid Catalysis, *J. Am. Chem. Soc.*, 2010, **132**, 13666-13668.
14. X. Sun, M. Wang, P. Li, X. Zhang and L. Wang, H<sub>2</sub>O<sub>2</sub>-Mediated Oxidative

- 
- Formation of Amides from Aromatic Amines and 1,3-Diketones as Acylation Agents *via* C-C Bond Cleavage at Room Temperature in Water under Metal-Free Conditions, *Green. Chem.*, 2013, **15**, 3289-3294.
15. R. Guo, C. Zhu, Z. Sheng, Y. Li, W. Yin and C. Chu, Silica Sulfuric Acid Mediated Acylation of Amines with 1,3-Diketones *via* C-C Bond Cleavage under Solvent-Free Conditions, *Tetrahedron Letters.*, 2015, **56**, 6223-6226.
  16. L. Cicco, J. A. Hernandez-Fernandez, A. Salomone, P. Vitale, M. Ramos-Martin, J. Gonzalez-Sabin, A. Presa Soto, F. M. Perna, V. Capriati and J. Garcia-Alvarez, Copper-Catalyzed Goldberg-Type C-N Coupling in Deep Eutectic Solvents (DESs) and Water under Aerobic Conditions, *Org. Biomol. Chem.*, 2021, **19**, 1773-1779.
  17. A. Correa, S. Elmore and C. Bolm, Iron-Catalyzed n-Arylations of Amides, *Chem. Eur. J.*, 2008, **14**, 3527-3529.
  18. Y. Gao, J. Liu, Z. Li, T. Guo, S. Xu, H. Zhu, F. Wei, S. Chen, H. Gebru and K. Guo, Dichloroimidazolidinedione-Activated Beckmann Rearrangement of Ketoximes for Accessing Amides and Lactams, *J. Org. Chem.*, 2018, **83**, 2040-2049.
  19. F. Dobah, C. M. Mazodze and W. F. Petersen, Cross-Dehydrogenative Cyclization-Dimerization Cascade Sequence for the Synthesis of Symmetrical 3,3'-Bisoxindoles, *Org. Lett.*, 2021, **23**, 5466-5470.
  20. J. Zhu, B. Gao and H. Huang, Palladium-Catalyzed Highly Regioselective Hydroaminocarbonylation of Aromatic Alkenes to Branched Amides, *Org. Biomol. Chem.*, 2017, **15**, 2910-2913.
  21. P. Yang, X. Wang, Y. Ma, Y. Sun, L. Zhang, J. Yue, K. Fu, J. S. Zhou and B. Tang, Nickel-Catalyzed C-Alkylation of Thioamide, Amides and Esters by Primary Alcohols through a Hydrogen Autotransfer Strategy, *Chem. Commun.*, 2020, **56**, 14083-14086.
  22. Gaussian 16 Rev. A.03, M. J. Frisch, G. W. Trucks, H. B. Schlegel, G. E. Scuseria, M. A. Robb, J. R. Cheeseman, G. Scalmani, V. Barone, G. A. Petersson, H. Nakatsuji, X. Li, M. Caricato, A. V. Marenich, J. Bloino, B. G. Janesko, R. Gomperts, B. Mennucci, H. P. Hratchian, J. V. Ortiz, A. F. Izmaylov, J. L. Sonnenberg, Williams; F. Ding, F. Lipparini, F. Egidi, J. Goings, B. Peng, A. Petrone, T. Henderson, D. Ranasinghe, V. G. Zakrzewski, J. Gao, N. Rega, G. Zheng, W. Liang, M. Hada, M. Ehara, K. Toyota, R. Fukuda, J. Hasegawa, M. Ishida, T. Nakajima, Y. Honda, O. Kitao, O. Nakai, T. Vreven, K. Throssell, J. A. Montgomery Jr, J. E. Peralta, F. Ogliaro, M. J. Bearpark, J. J. Heyd, E. N. Brothers, K. N. Kudin, V. N. Staroverov, T. A. Keith, R. Kobayashi, J. Normand, K. Raghavachari, A. P. Rendell, J. C. Burant, S. S. Iyengar, J. Tomasi, M. Cossi, J. M.

- 
- Millam, M. Klene, C. Adamo, R. Cammi, J. W. Ochterski, R. L. Martin, K. Morokuma, O. Farkas, J. B. Foresman and D. J. Fox, Gaussian Inc. Wallingford CT, 2016.
23. M. Ernzerhof and G. E. Scuseria, Assessment of The Perdew-Burke-Ernzerhof Exchange-Correlation Functional, *J. Chem. Phys.*, 1999, **110**, 5029-5036.
24. F. Weigend and R. Ahlrichs, Balanced Basic Sets of Split Valence, Triple Zeta Valence and Quadruple Zeta Valence Quality for H to Rn: Design and Assessment of accuracy, *Phys. Chem. Chem. Phys.*, 2005, **7**, 3297-3305.
25. F. Weigend, Accurate Coulomb-Fitting Basis Sets for H to Rn, *Phys. Chem. Chem. Phys.*, 2006, **8**, 1057-1065.
26. A. V. Marenich, C. J. Cramer and D. G. Truhlar, Universal Solvation Model Based On Solute Electron Density and On A Continuum Model of The Solvent Defined by The Bulk Dielectric Constant and Atomic Surface Tensions, *J. Phys. Chem. B*, 2009, **113**, 6378-6396.
27. CYLview, 1.0b, C. Y. Legault, Université de Sherbrooke, 2009.
28. GaussView, Version 6, R. Dennington, T. A. Keith and J. M. Millam, Semichem Inc., Shawnee Mission, KS, 2016.

## 7. NMR Spectra of Compounds 1g-1h, 1k, 2a and 2-31

### $^1\text{H}$ NMR (400MHz, $\text{CDCl}_3$ ) spectrum of product 1g

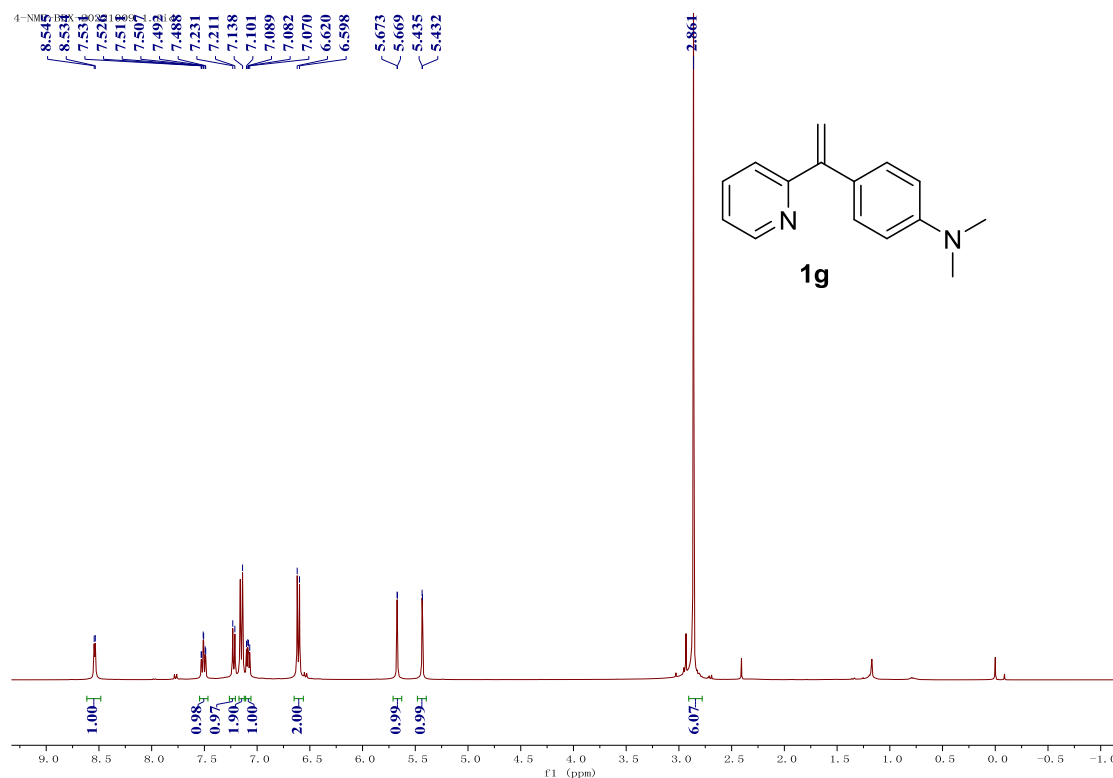

### $^{13}\text{C}$ NMR (100MHz, $\text{CDCl}_3$ ) spectrum of product 1g

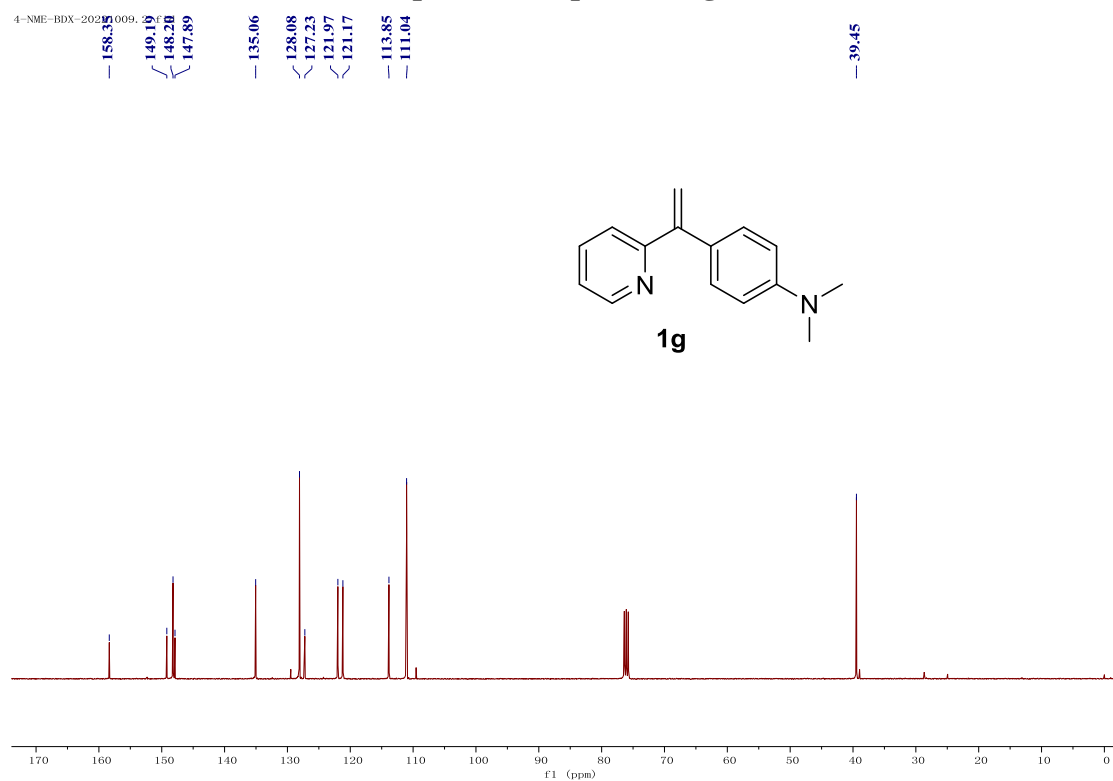

### <sup>1</sup>H NMR (400MHz, CDCl<sub>3</sub>) spectrum of product 1h

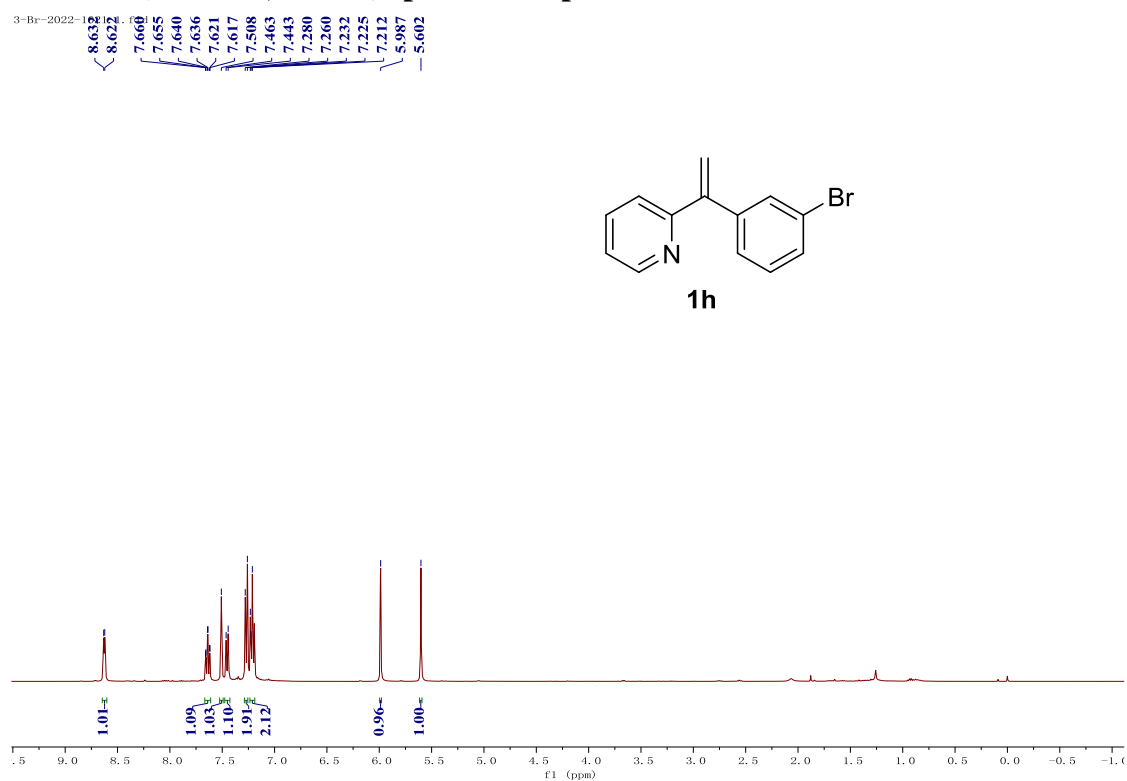

### <sup>13</sup>C NMR (100MHz, CDCl<sub>3</sub>) spectrum of product 1h

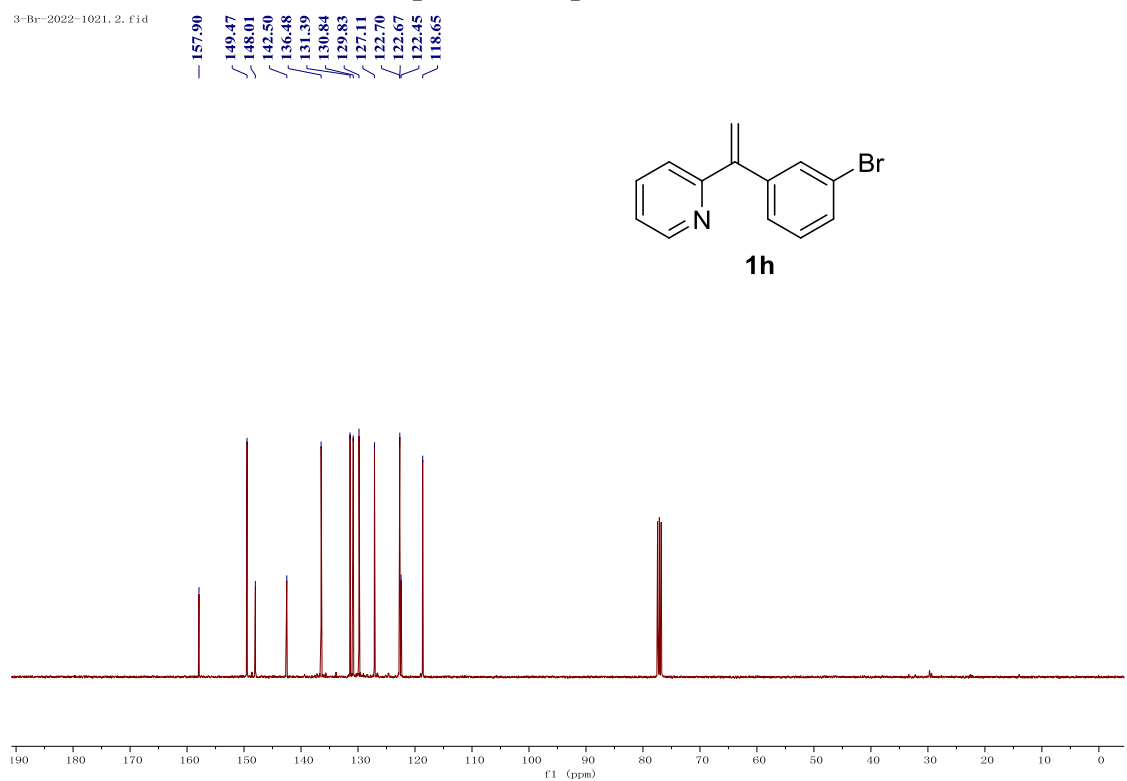

### <sup>1</sup>H NMR (400MHz, CDCl<sub>3</sub>) spectrum of product 1k

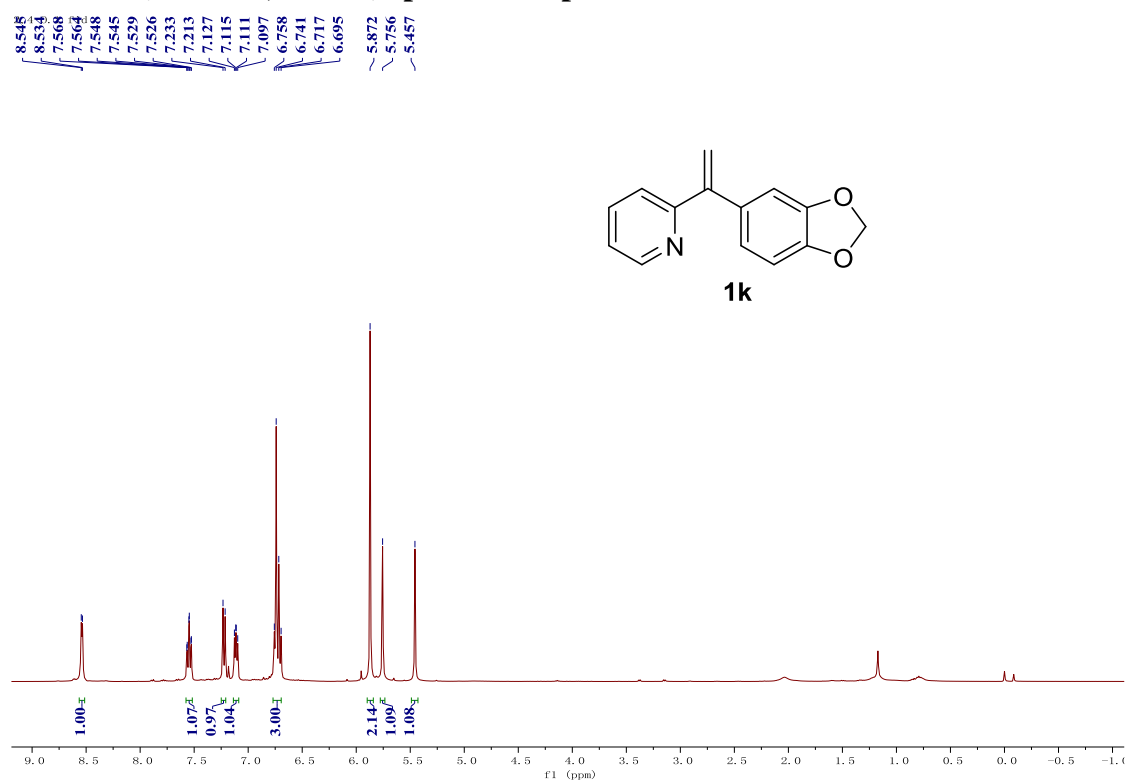

### <sup>13</sup>C NMR (100MHz, CDCl<sub>3</sub>) spectrum of product 1k

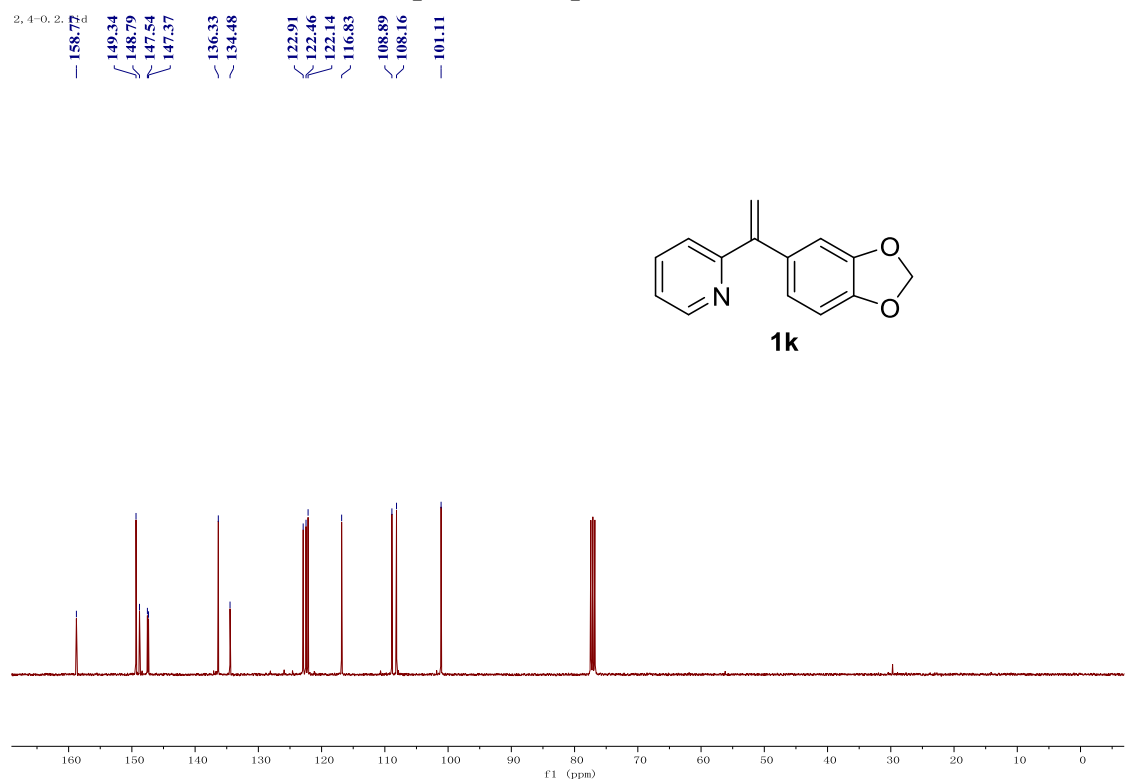

### $^1\text{H}$ NMR (400MHz, $\text{CDCl}_3$ ) spectrum of product 2a

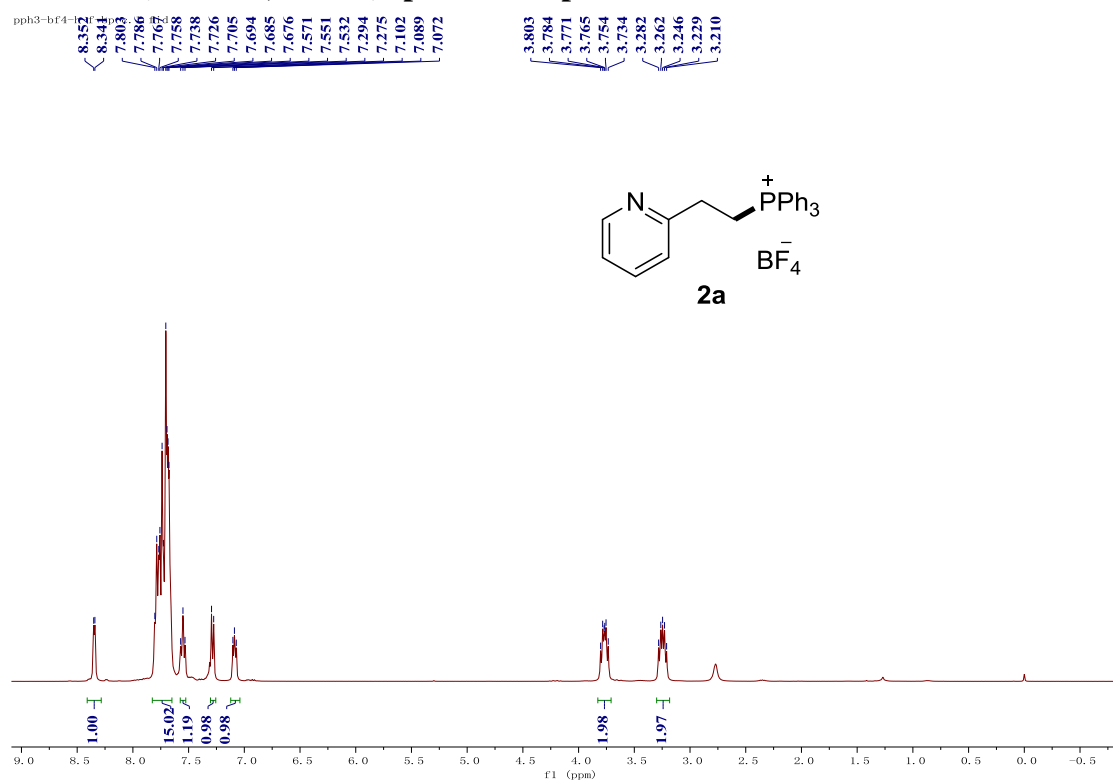

### $^{19}\text{F}$ NMR (376 MHz, $\text{CDCl}_3$ ) spectrum of product 2a

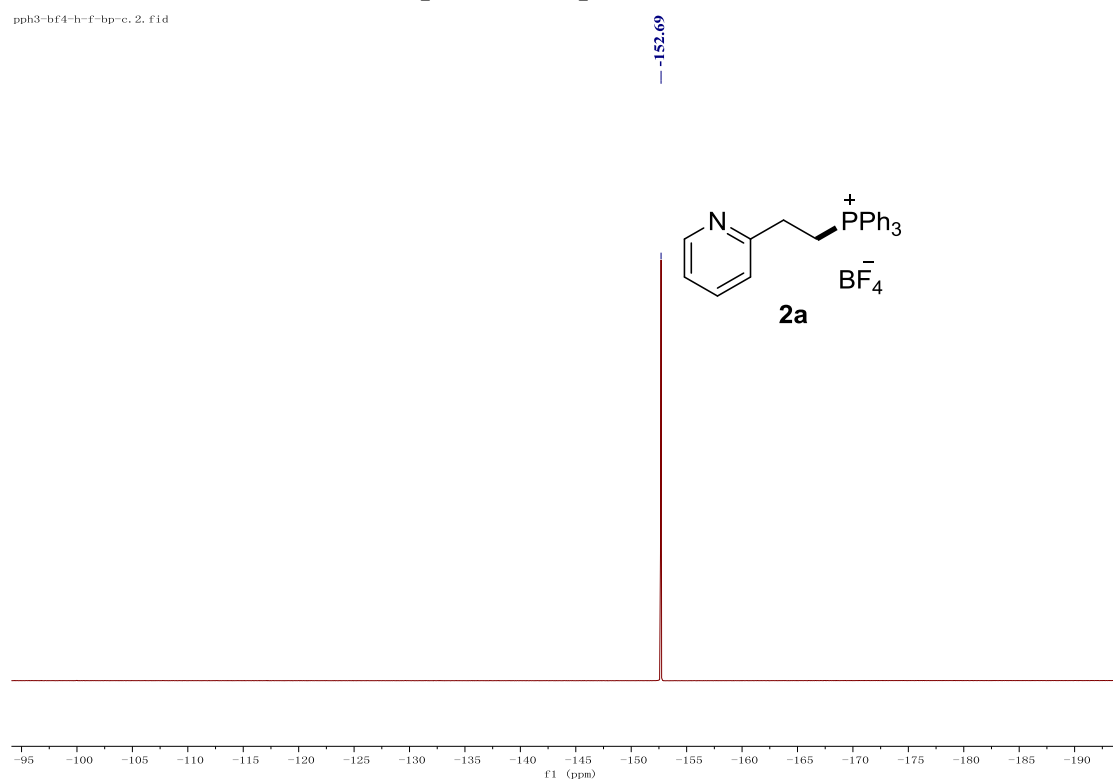

### $^{11}\text{B}$ NMR (128 MHz, $\text{CDCl}_3$ ) spectrum of product 2a

pph3-bf4-h-f-bp-c. 3. F1d

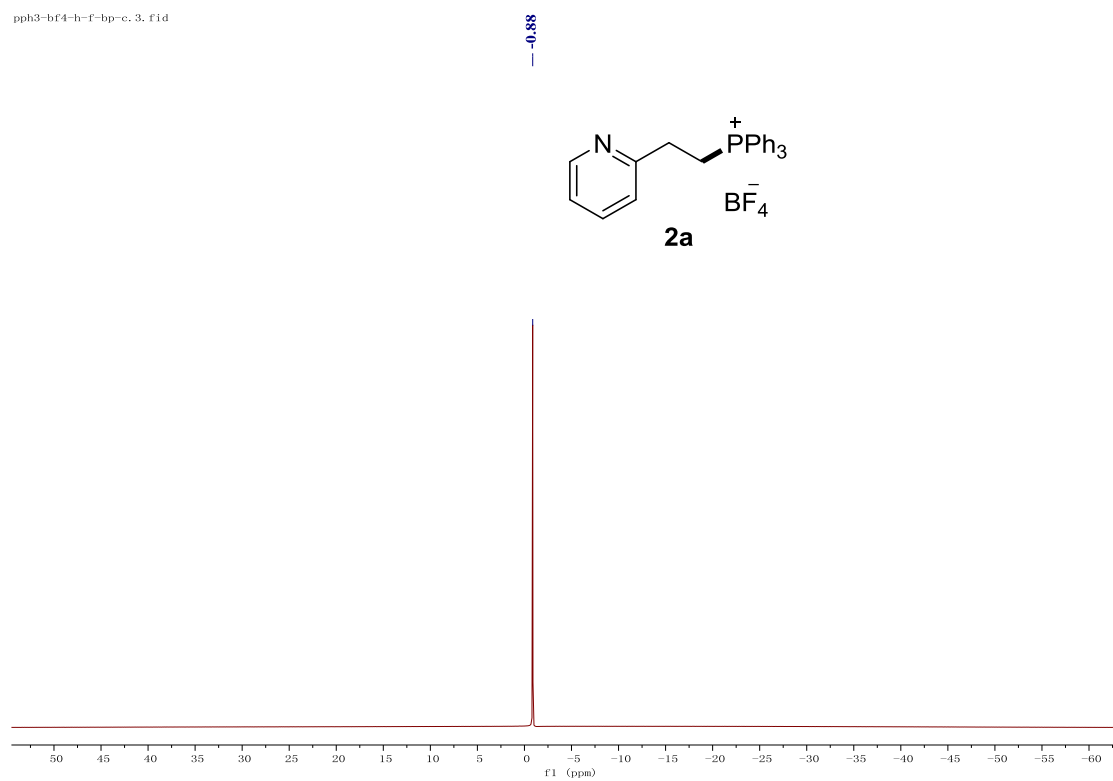

### $^{31}\text{P}$ NMR (162 MHz, $\text{CDCl}_3$ ) spectrum of product 2a

pph3-bf4-h-f-bp-c. 4. F1d

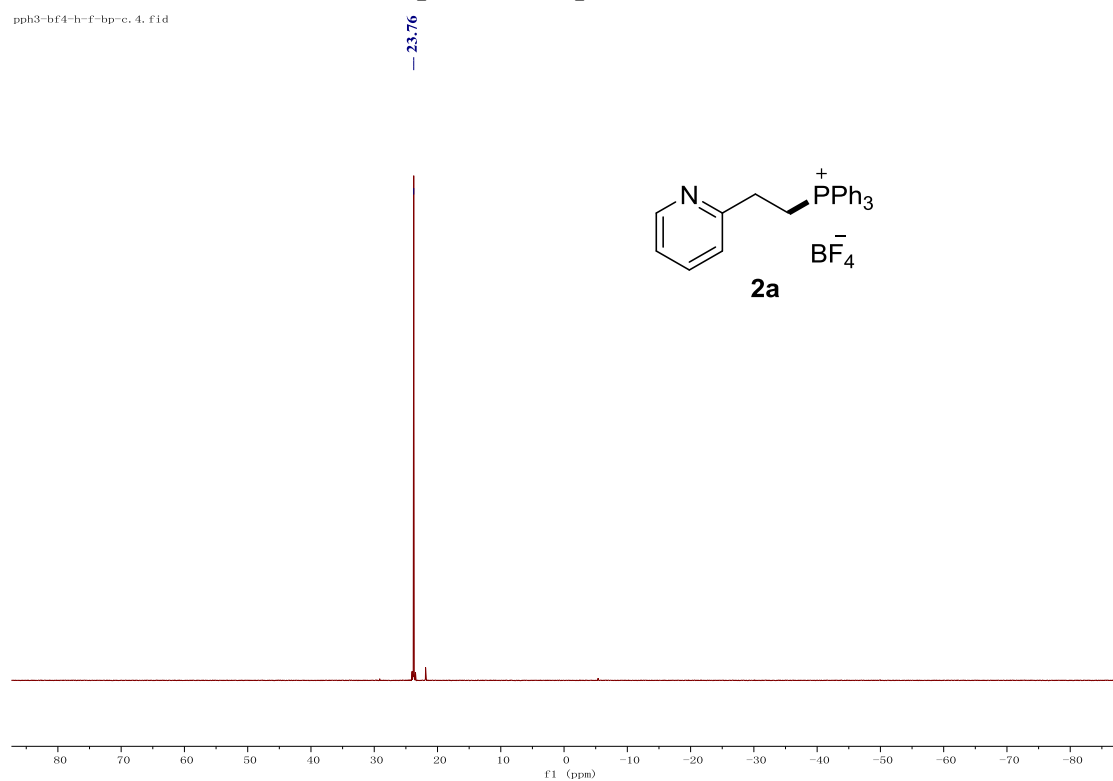



**$^{13}\text{C}$  NMR (100MHz,  $\text{CDCl}_3$ ) spectrum of product 2a**

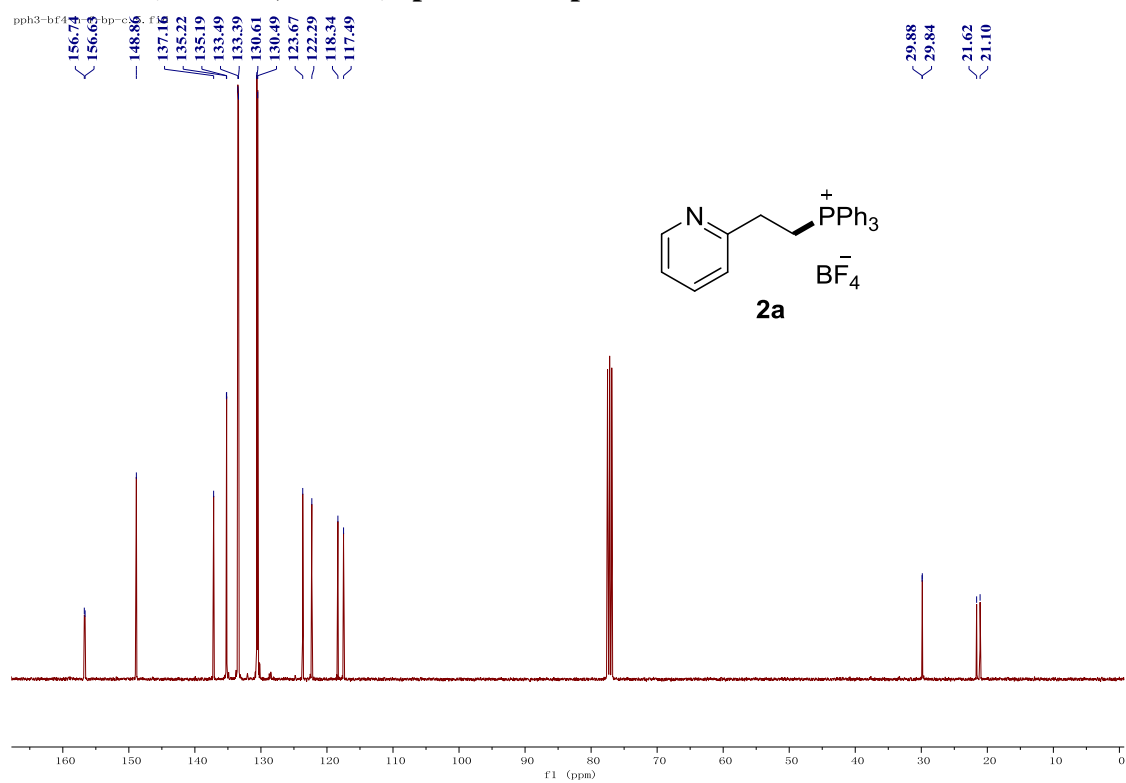

# <sup>1</sup>H NMR (400MHz, CDCl<sub>3</sub>) spectrum of product 2

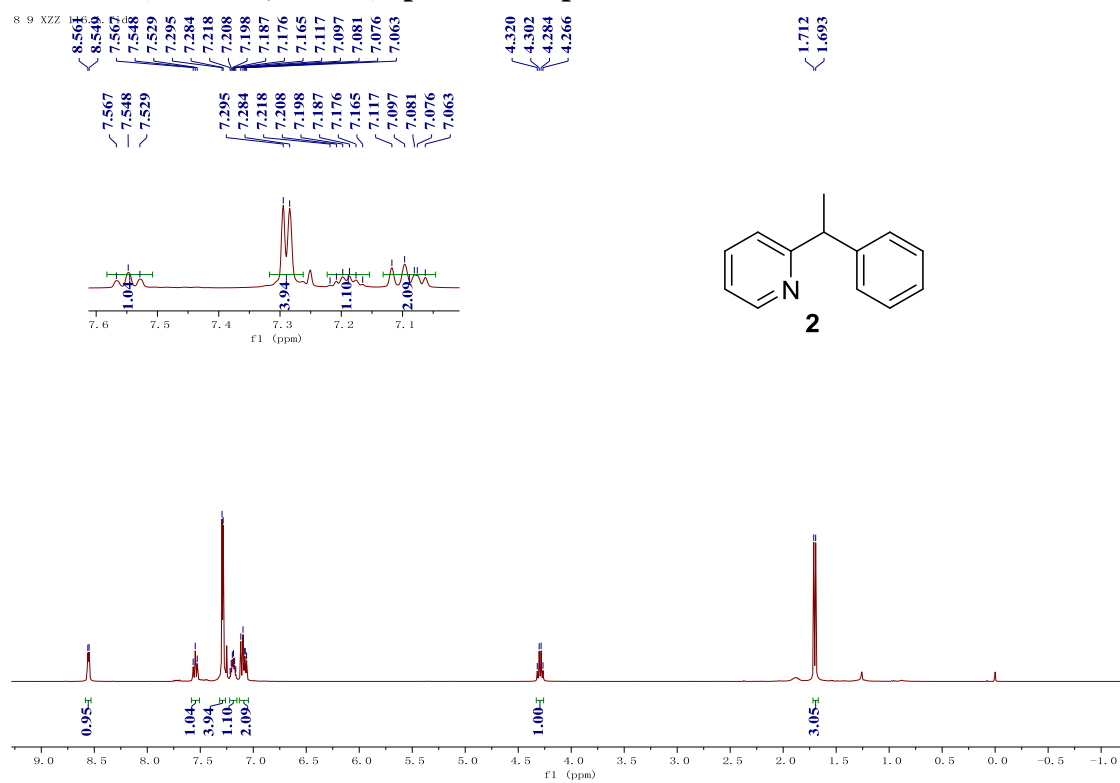

### <sup>1</sup>H NMR (400MHz, CDCl<sub>3</sub>) spectrum of product 3

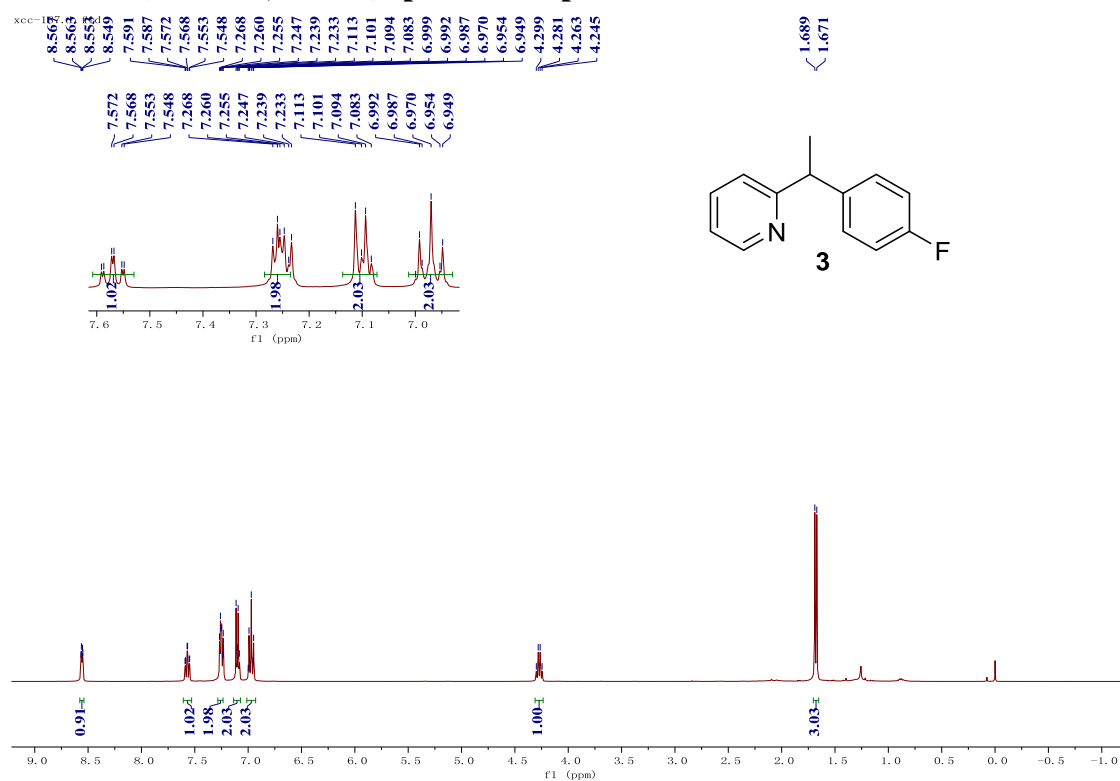

### <sup>19</sup>F NMR (376 MHz, CDCl<sub>3</sub>) spectrum of product 3

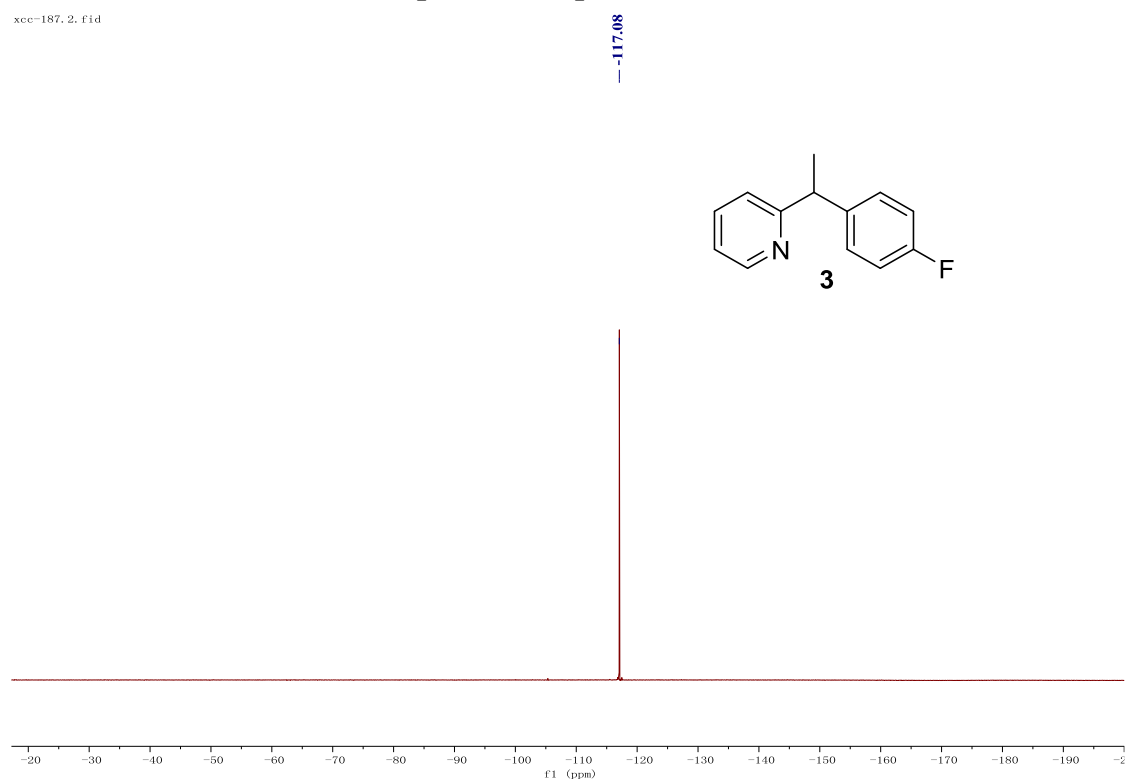

**<sup>1</sup>H NMR (400MHz, CDCl<sub>3</sub>) spectrum of product 4**

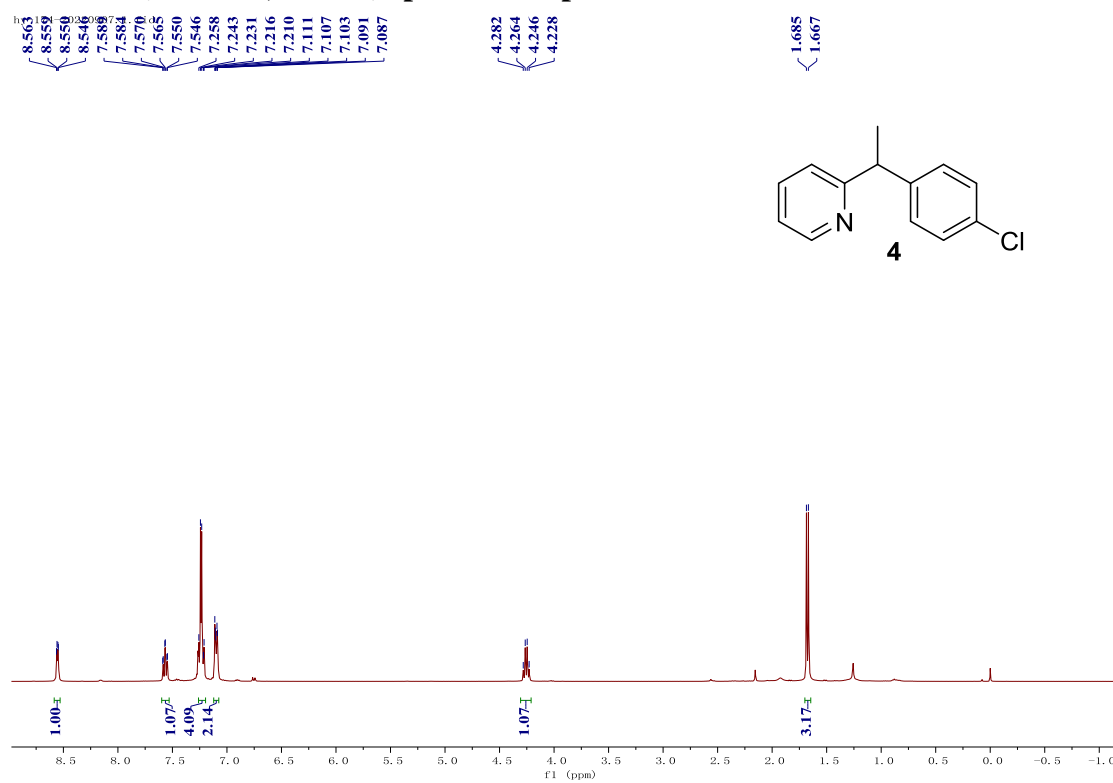

# <sup>1</sup>H NMR (400MHz, CDCl<sub>3</sub>) spectrum of product 5

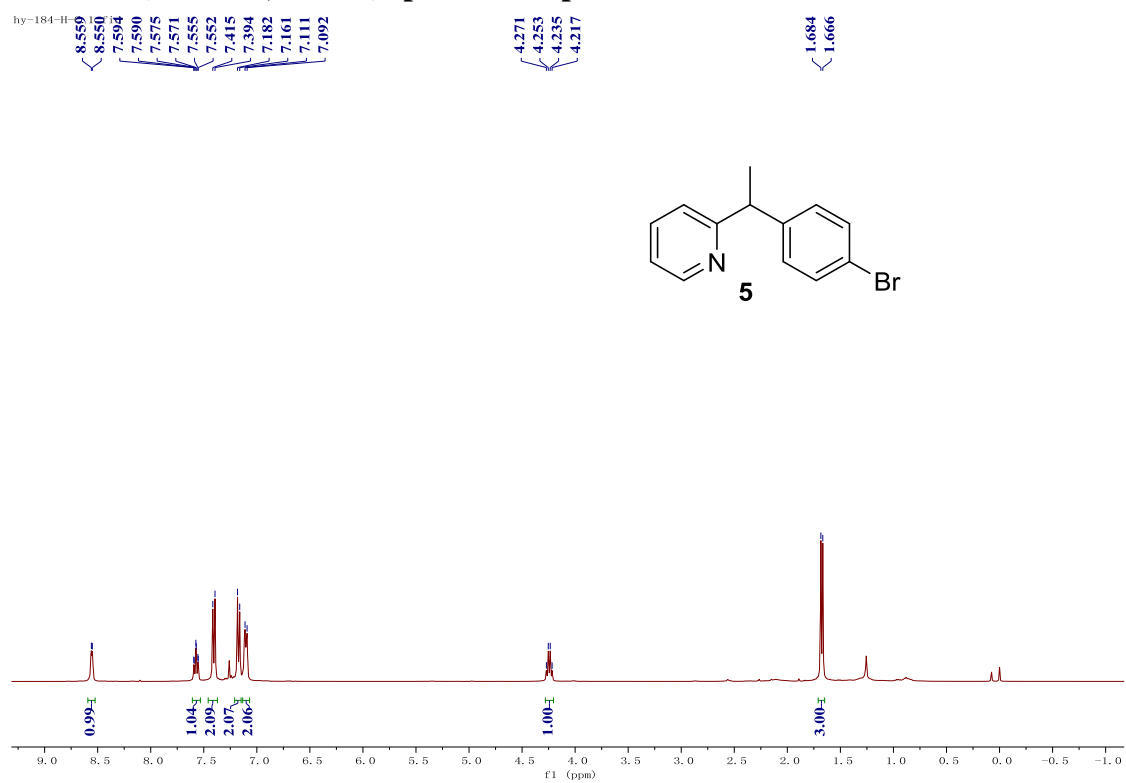

# <sup>1</sup>H NMR (400MHz, CDCl<sub>3</sub>) spectrum of product 6

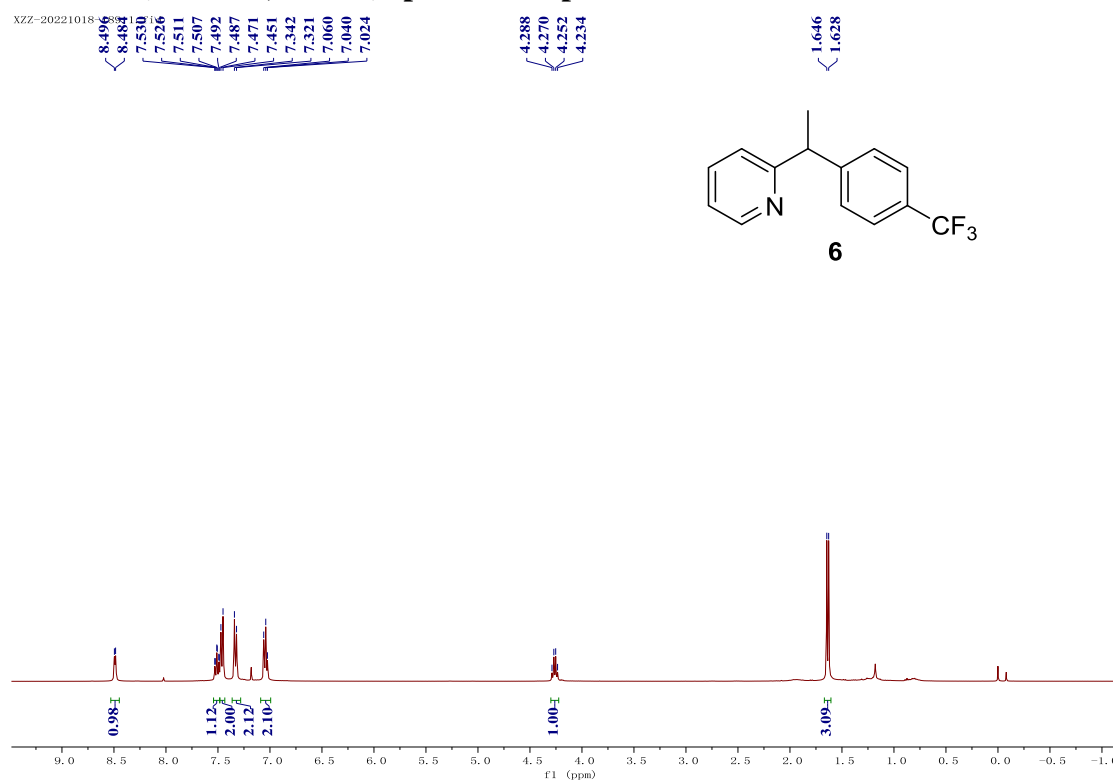

# <sup>19</sup>F NMR (376 MHz, CDCl<sub>3</sub>) spectrum of product 6

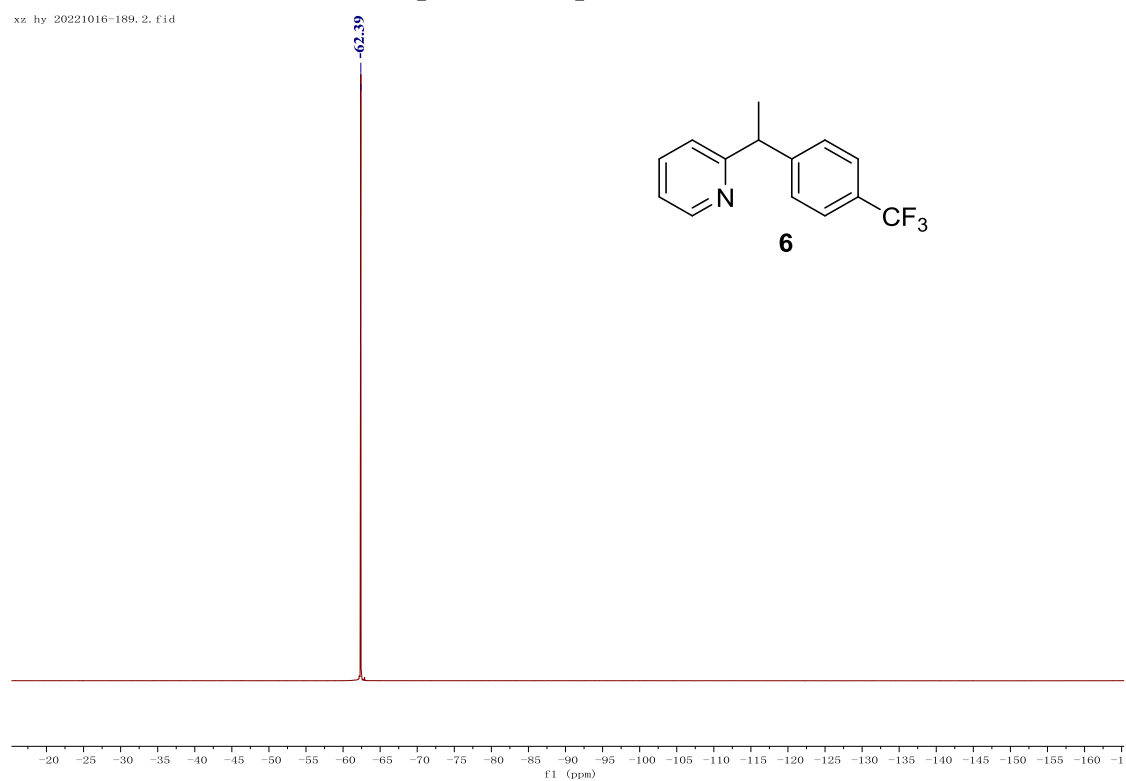

# <sup>1</sup>H NMR (400MHz, CDCl<sub>3</sub>) spectrum of product 7

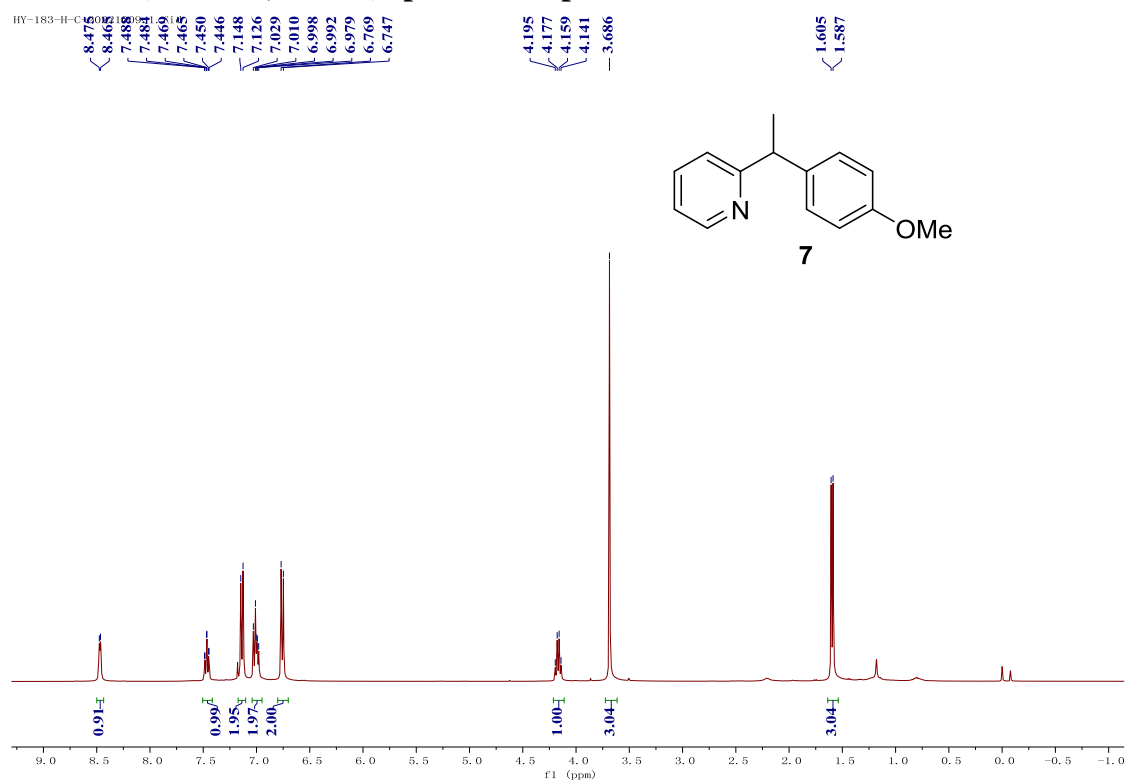

### <sup>1</sup>H NMR (400MHz, CDCl<sub>3</sub>) spectrum of product 8

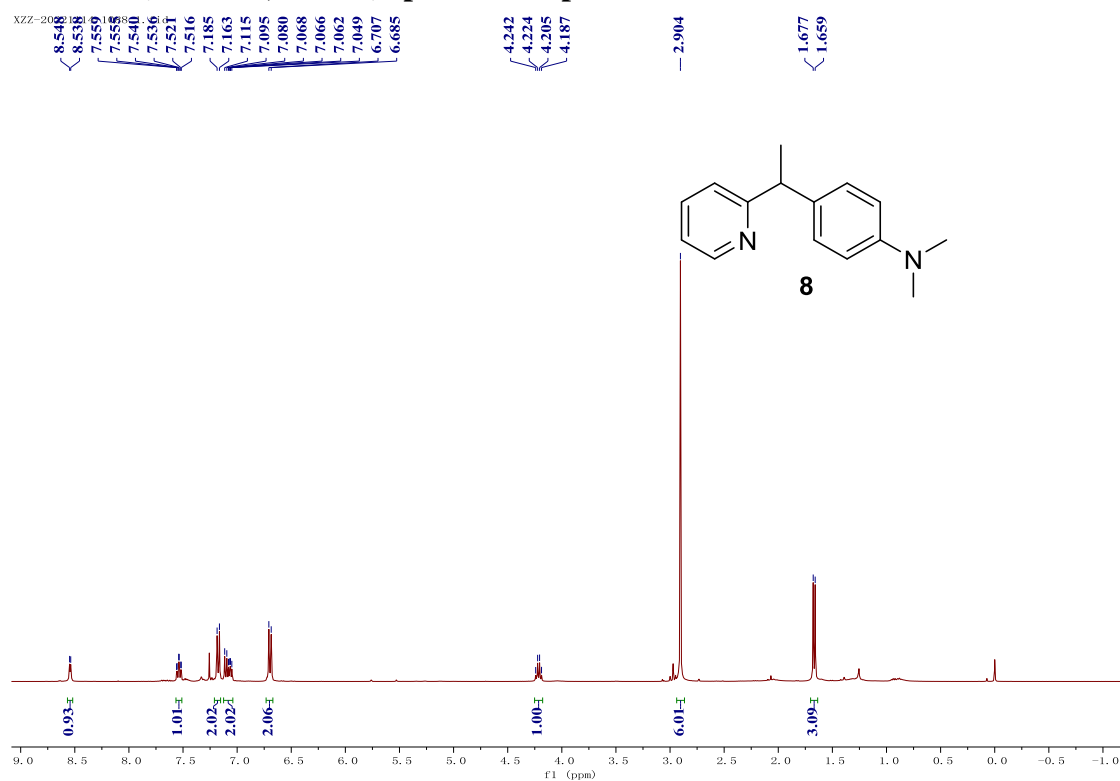

### <sup>13</sup>C NMR (100MHz, CDCl<sub>3</sub>) spectrum of product 8

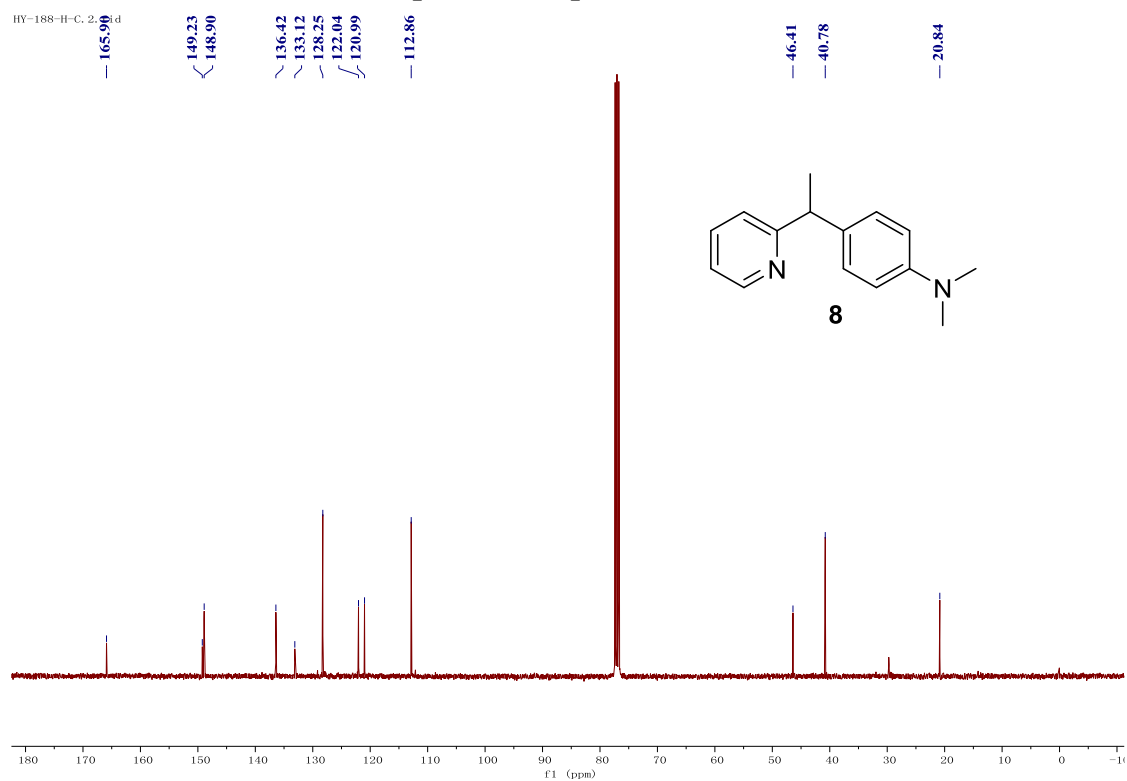



### $^1\text{H}$ NMR (400MHz, $\text{CDCl}_3$ ) spectrum of product 9

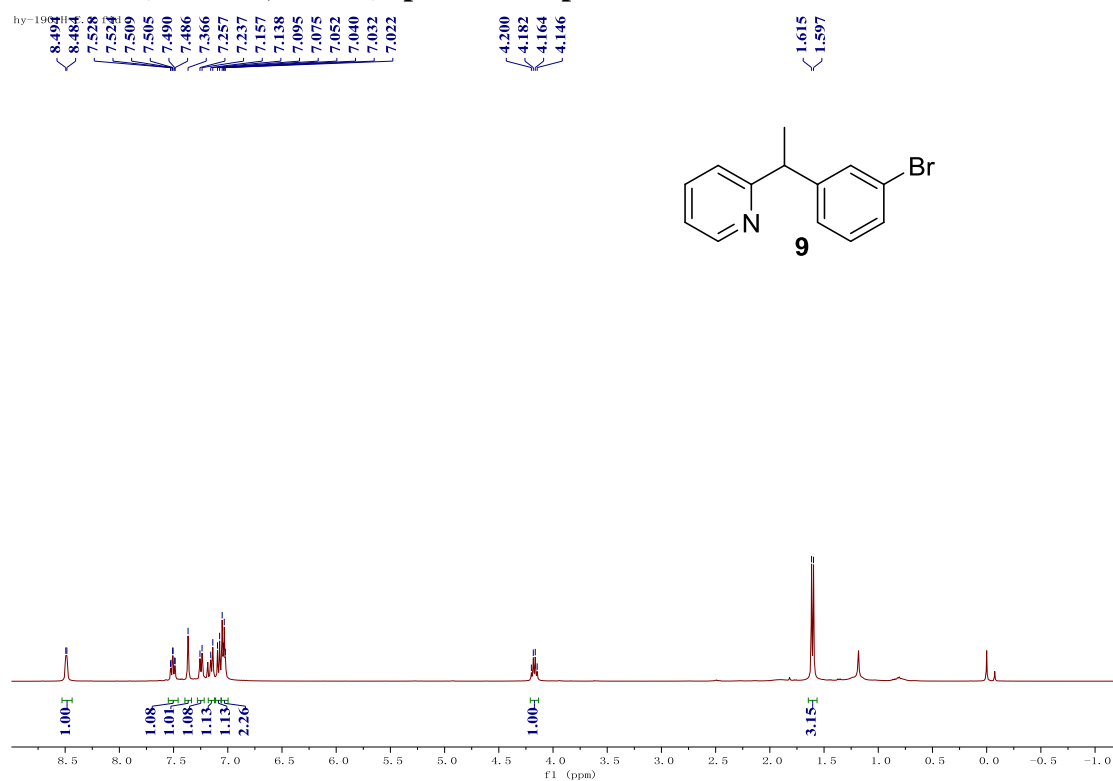

### $^{13}\text{C}$ NMR (100MHz, $\text{CDCl}_3$ ) spectrum of product 9

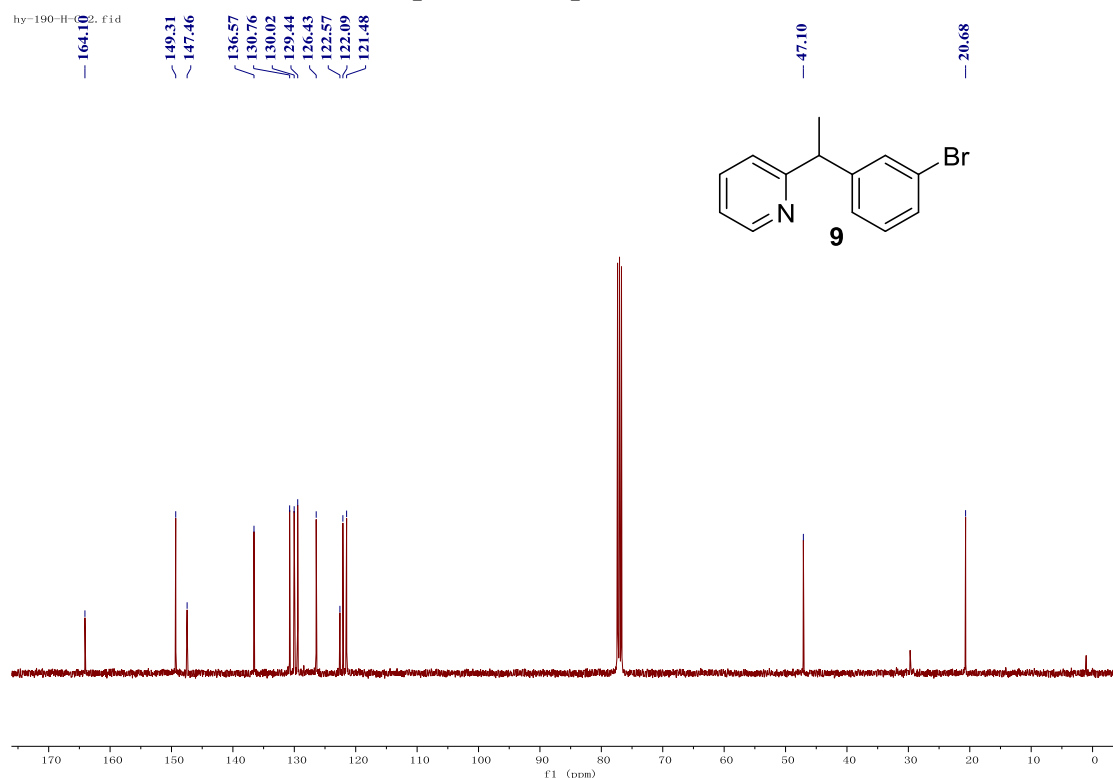

# <sup>1</sup>H NMR (400MHz, CDCl<sub>3</sub>) spectrum of product 10

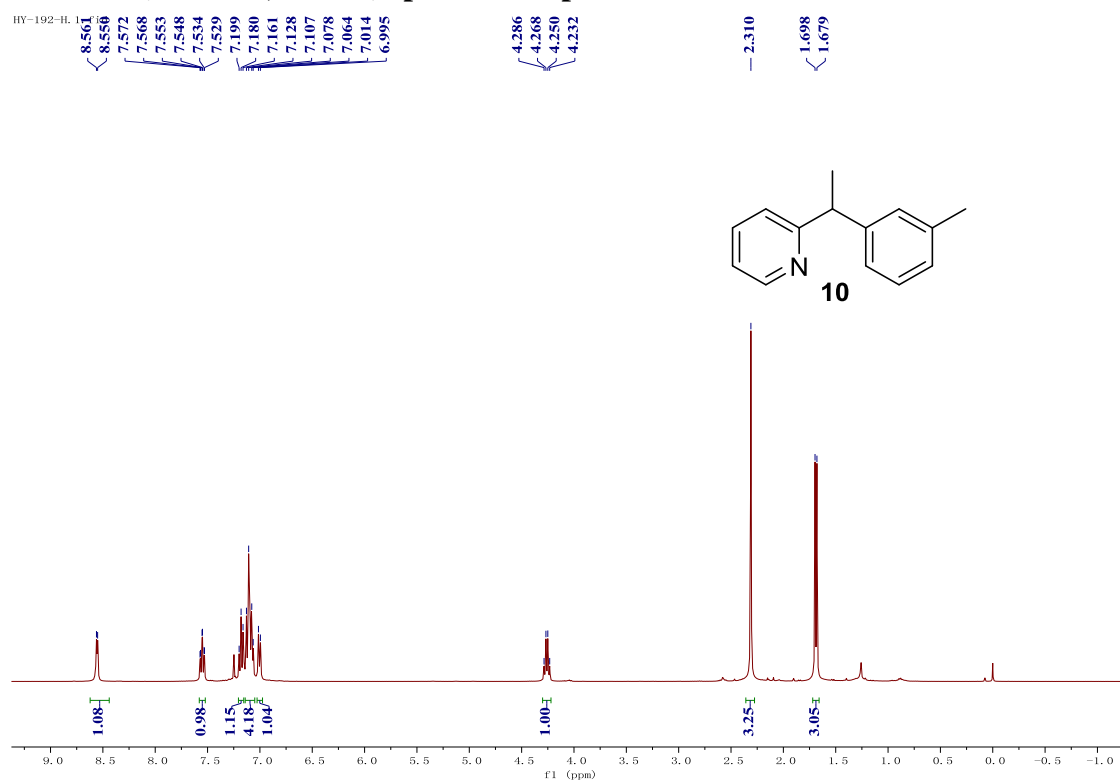

# <sup>1</sup>H NMR (400MHz, CDCl<sub>3</sub>) spectrum of product 11

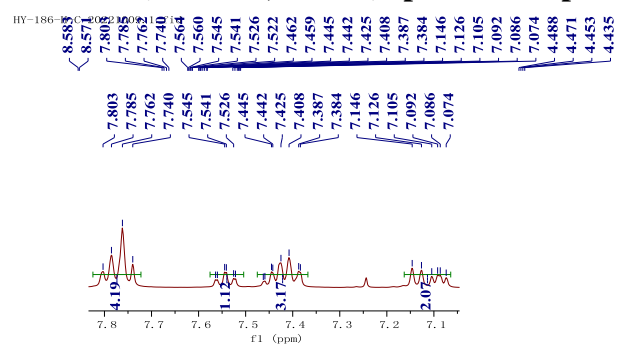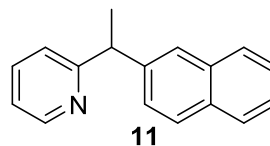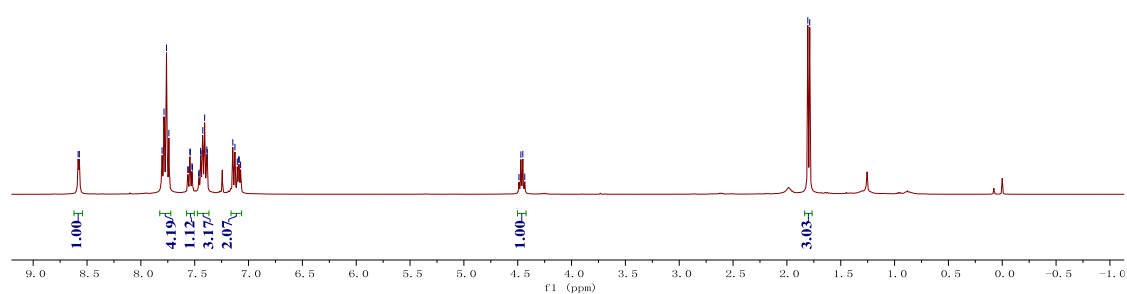

# <sup>1</sup>H NMR (400MHz, CDCl<sub>3</sub>) spectrum of product 12

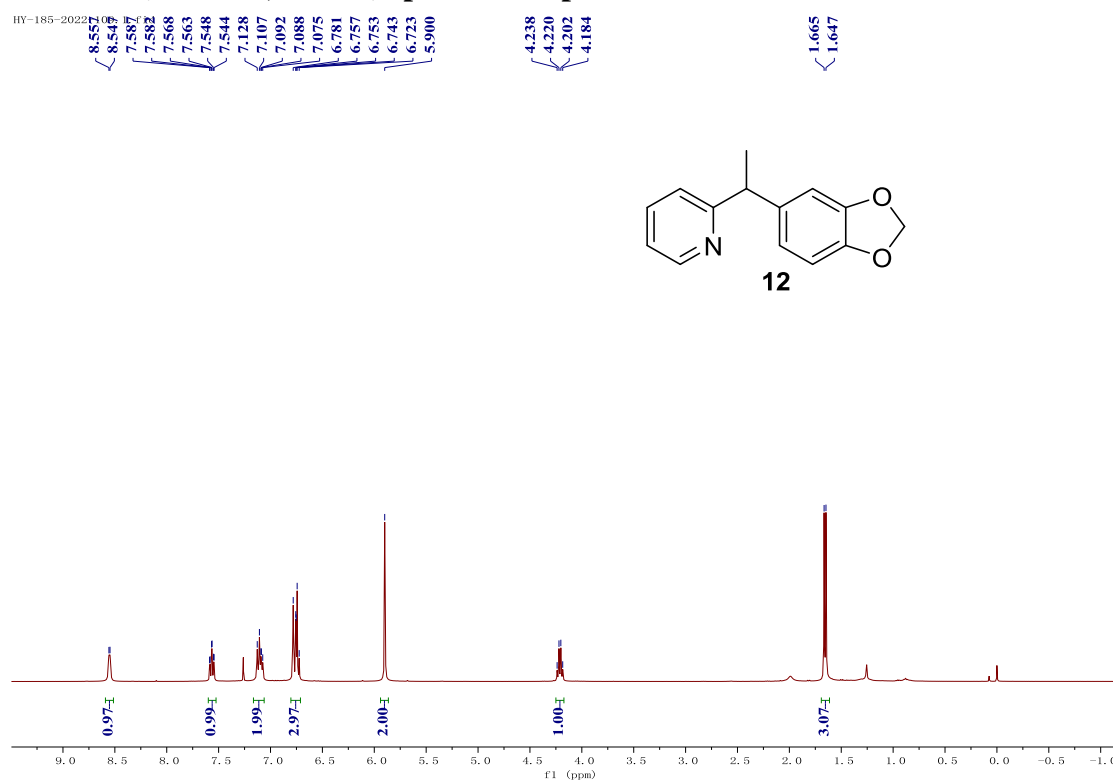

# <sup>13</sup>C NMR (100MHz, CDCl<sub>3</sub>) spectrum of product 12

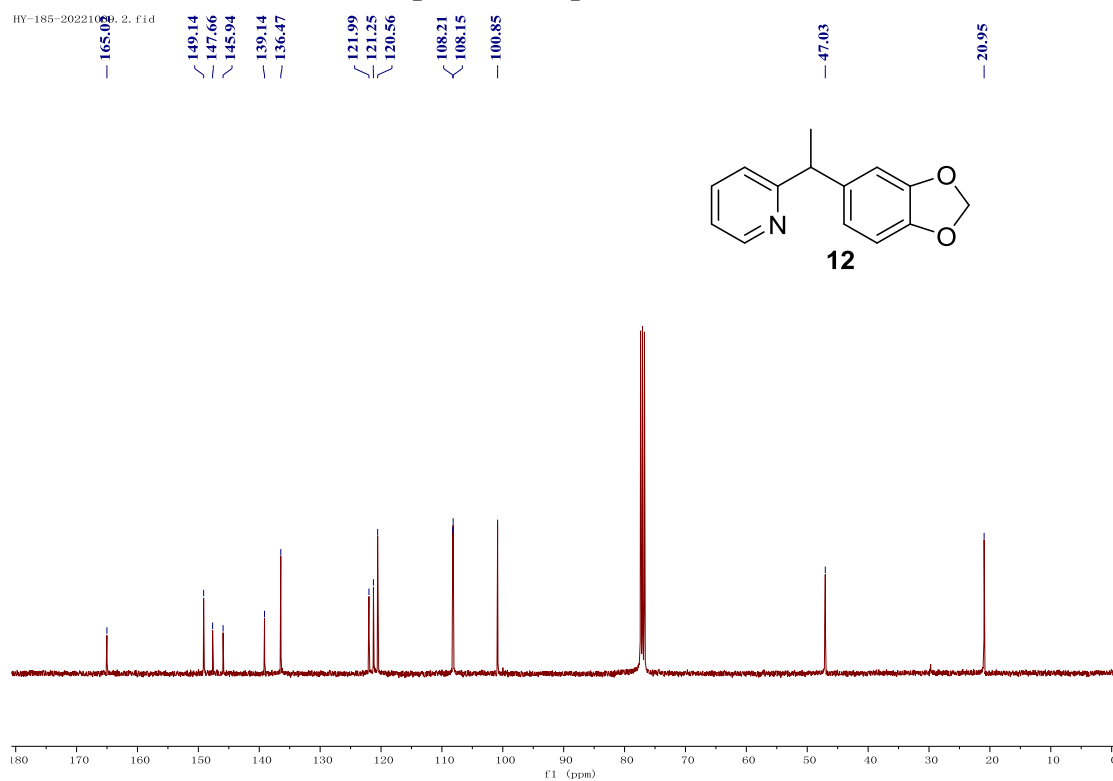

### <sup>1</sup>H NMR (400MHz, CDCl<sub>3</sub>) spectrum of product 13

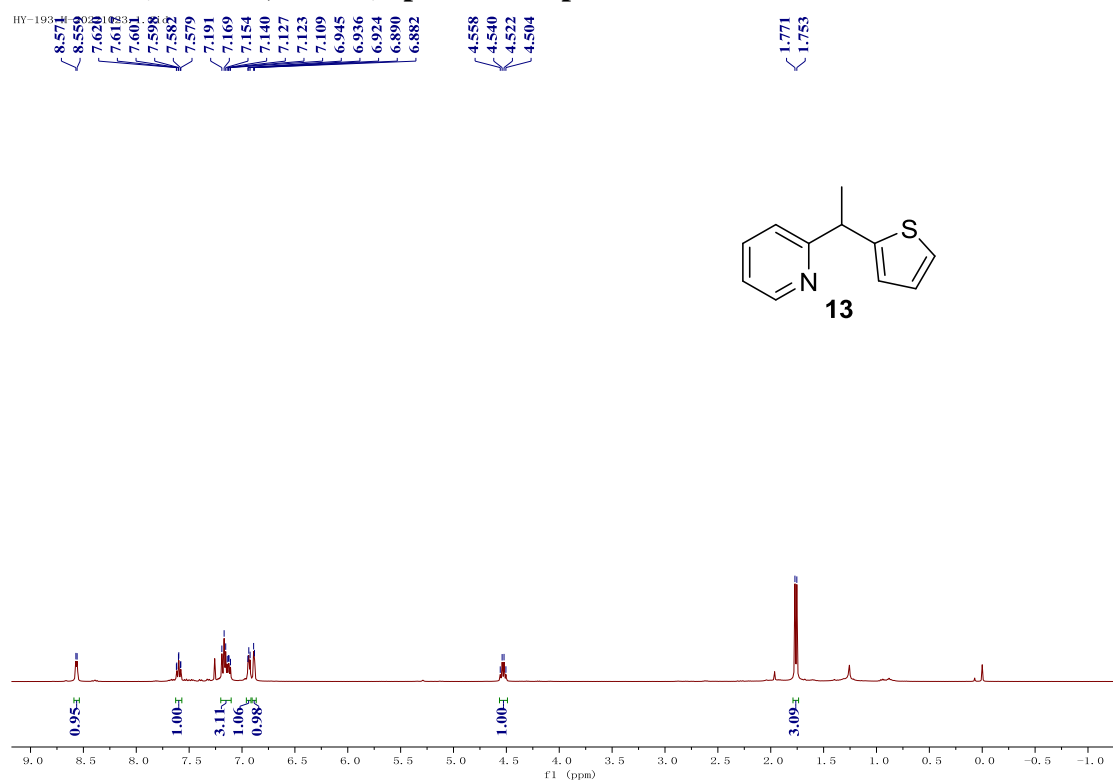

### <sup>13</sup>C NMR (100MHz, CDCl<sub>3</sub>) spectrum of product 13

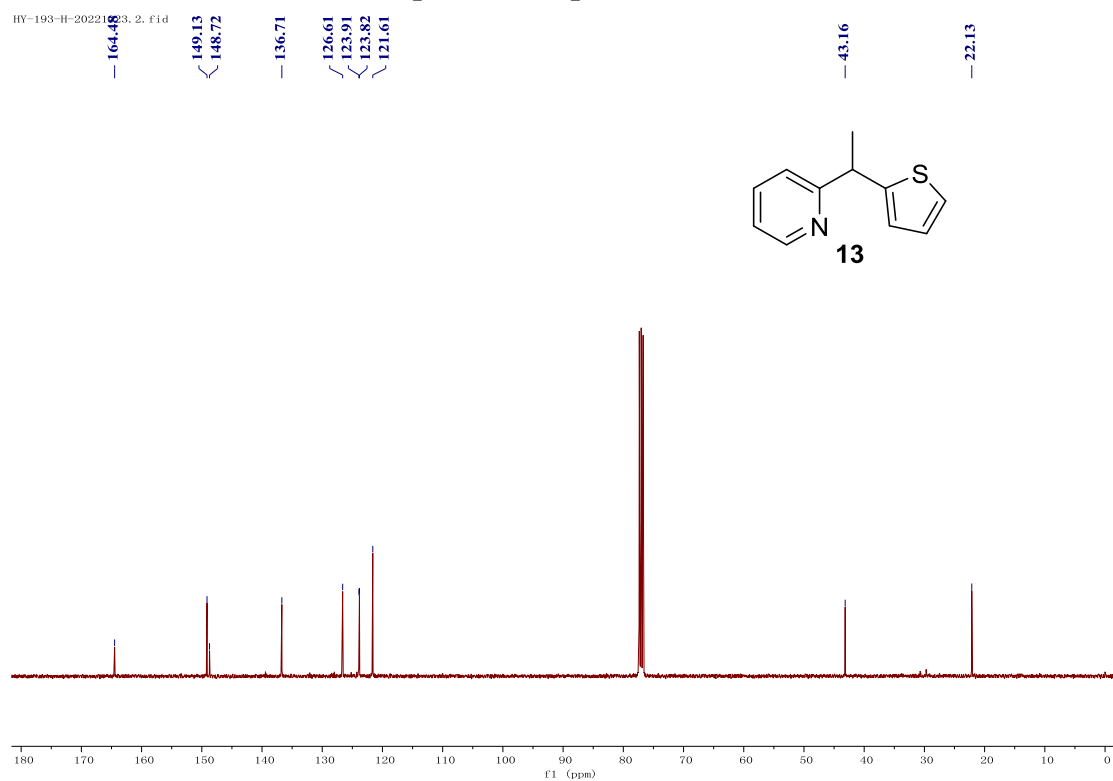

# <sup>1</sup>H NMR (400MHz, CDCl<sub>3</sub>) spectrum of product 14

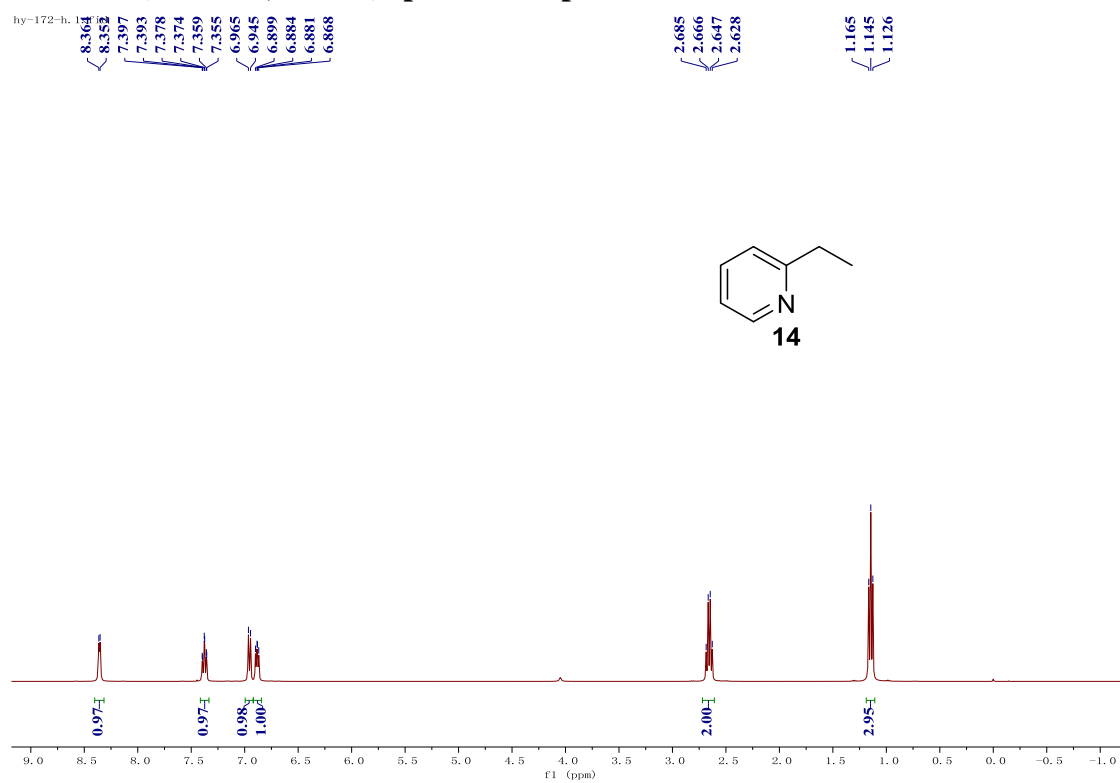

**<sup>1</sup>H NMR (400MHz, CDCl<sub>3</sub>) spectrum of product 15**

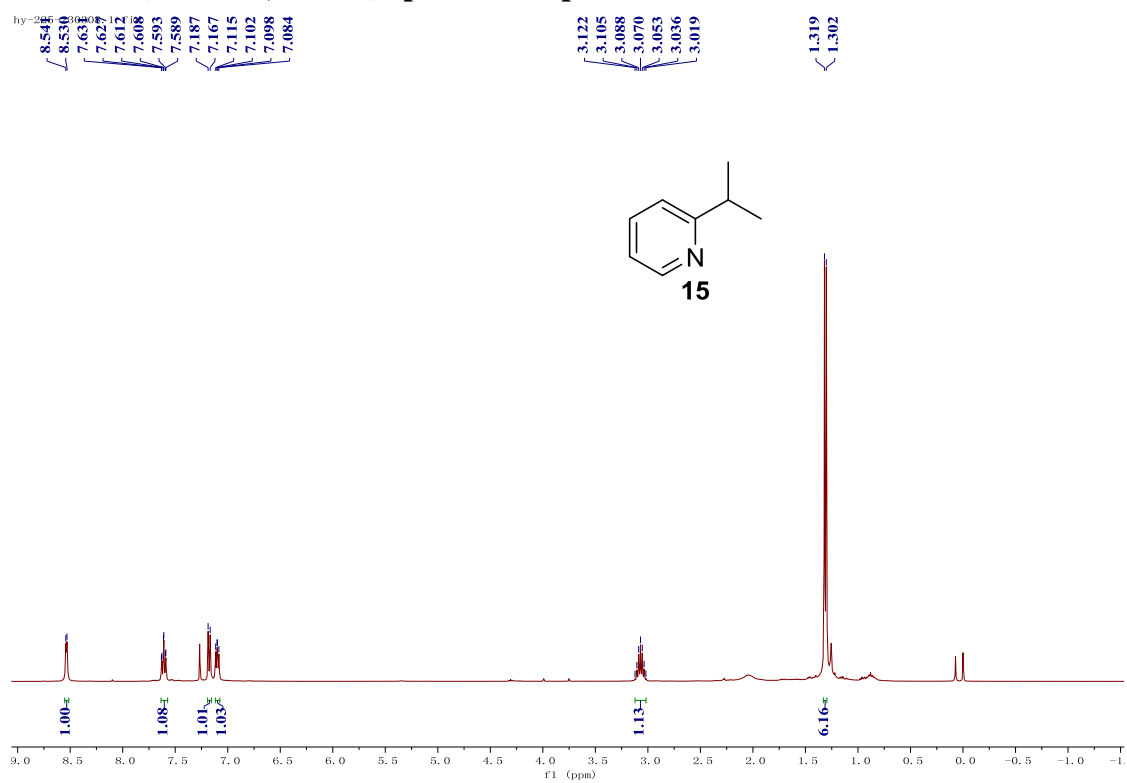

**<sup>1</sup>H NMR (400MHz, CDCl<sub>3</sub>) spectrum of product 16**

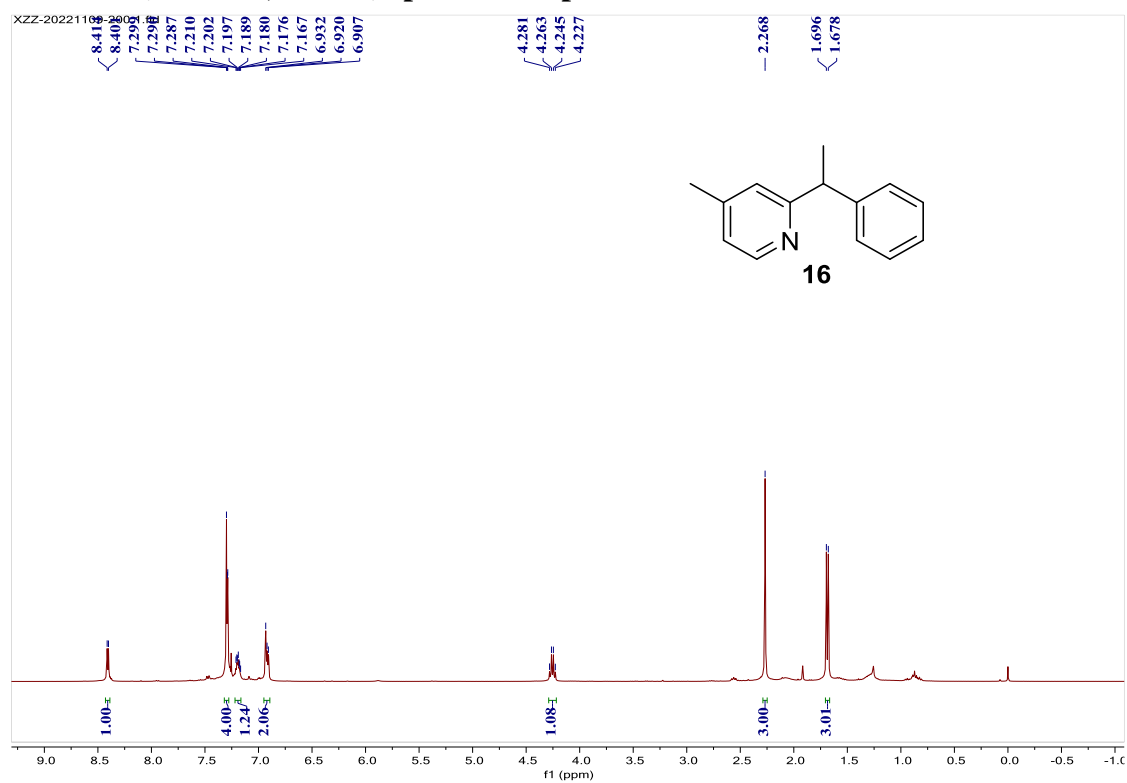



### <sup>1</sup>H NMR (400MHz, CDCl<sub>3</sub>) spectrum of product 17

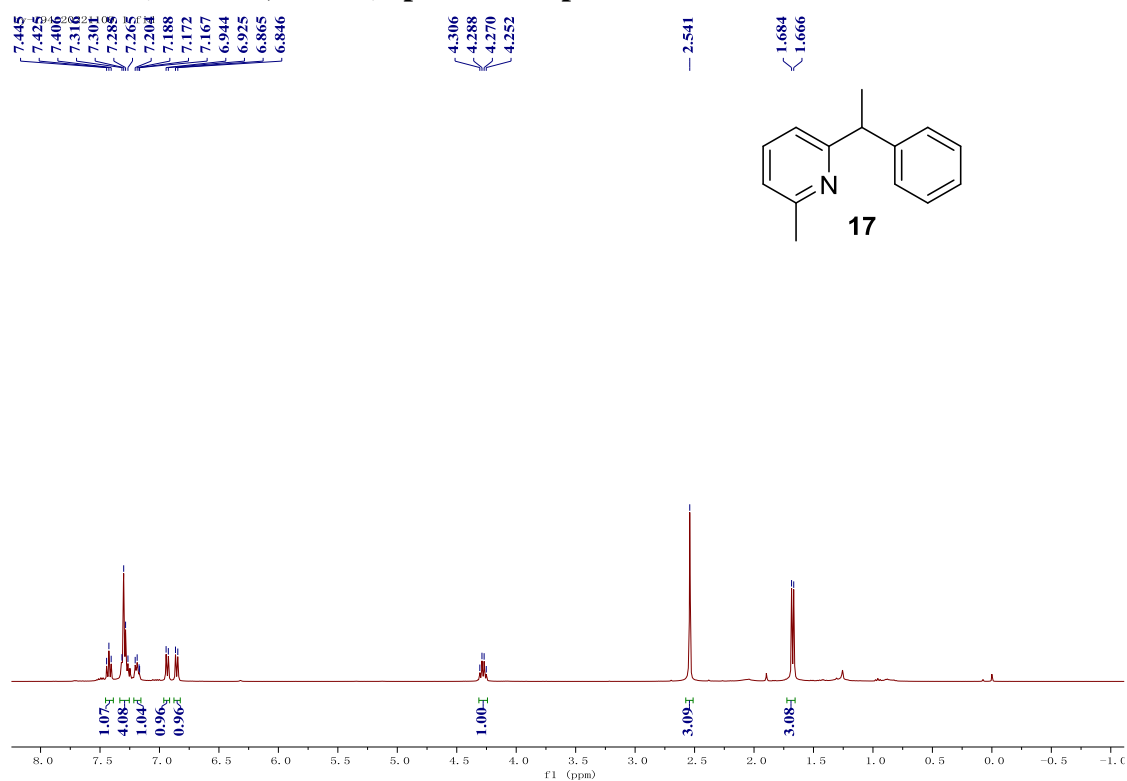

### <sup>13</sup>C NMR (100MHz, CDCl<sub>3</sub>) spectrum of product 17

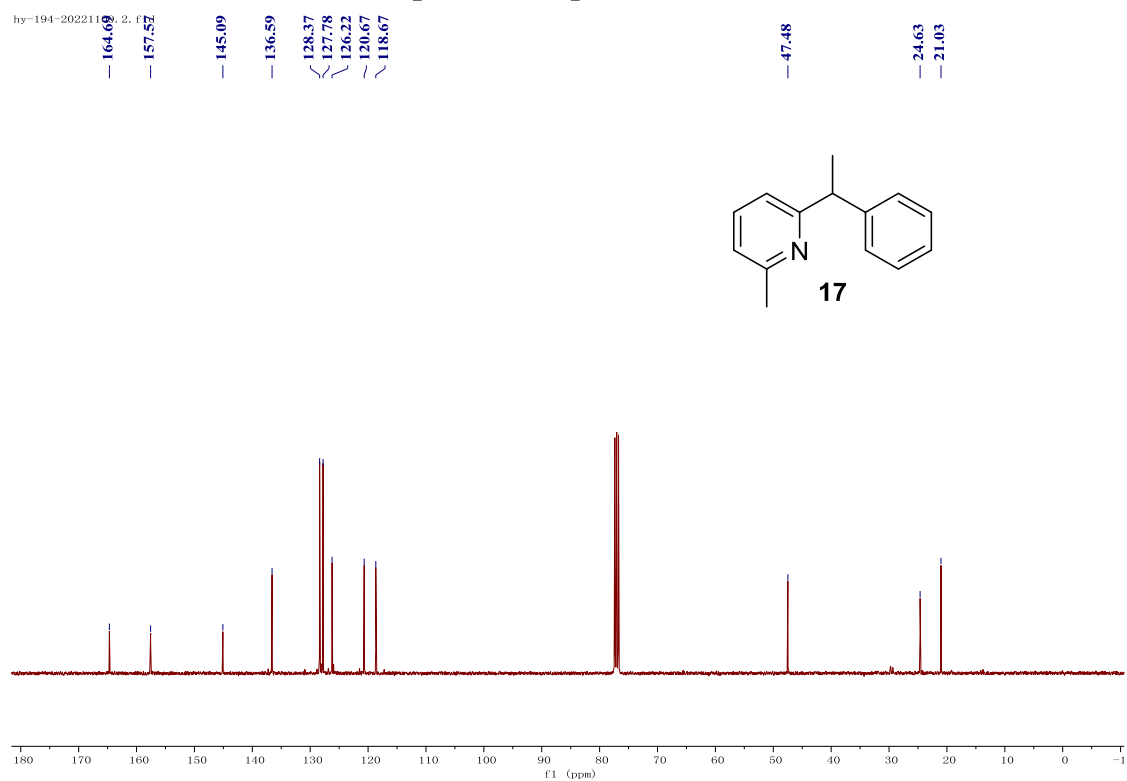

# <sup>1</sup>H NMR (400MHz, CDCl<sub>3</sub>) spectrum of product 18

hy-177-202222.1.fid

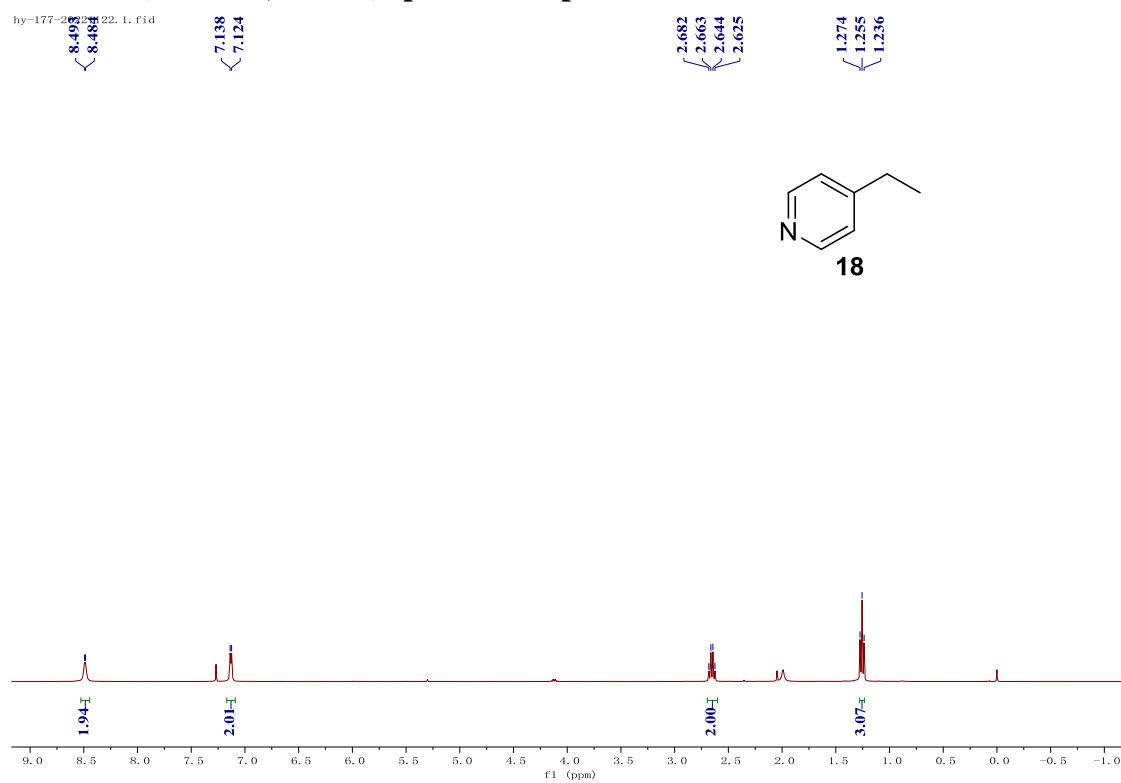

# <sup>1</sup>H NMR (400MHz, CDCl<sub>3</sub>) spectrum of product 19

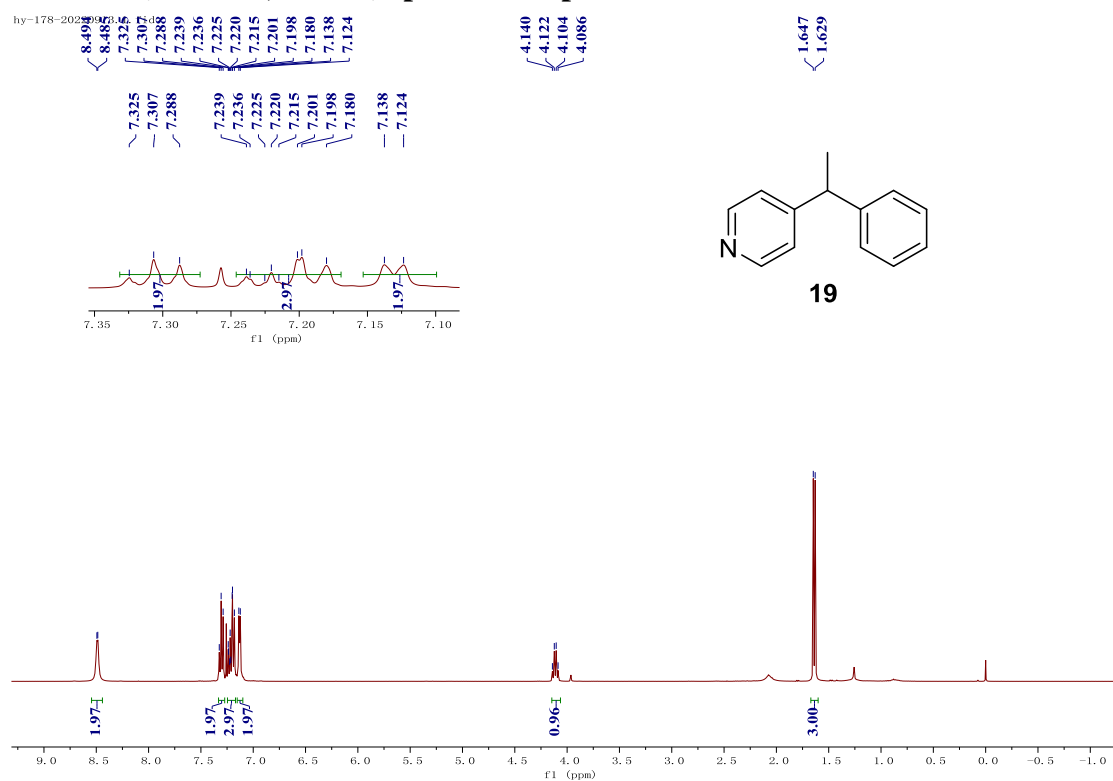

# <sup>1</sup>H NMR (400MHz, CDCl<sub>3</sub>) spectrum of product 20

hy-2--20220502.1.f16

7.40  
7.380  
7.230  
7.118  
7.098

2.400  
2.381  
2.362  
2.343  
2.305

1.256  
1.237  
1.218

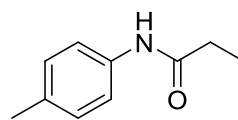

20

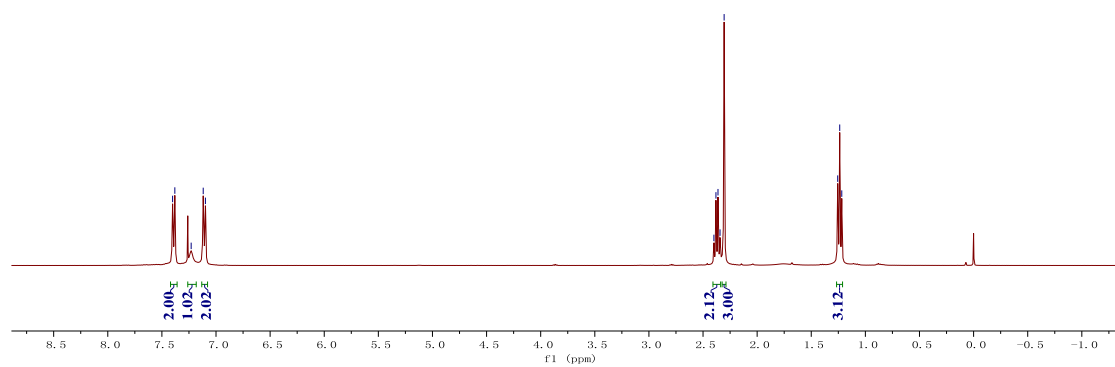

# <sup>1</sup>H NMR (400MHz, CDCl<sub>3</sub>) spectrum of product 21

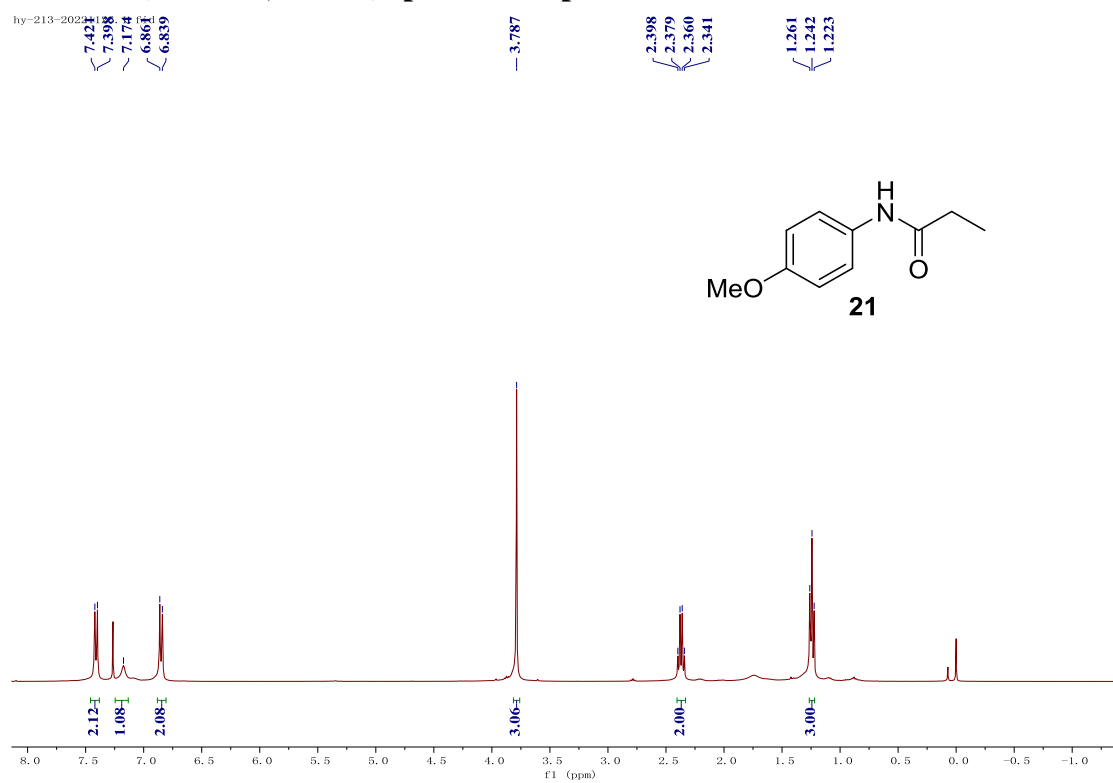

# <sup>1</sup>H NMR (400MHz, CDCl<sub>3</sub>) spectrum of product 22

hy-214-20221126.1

7.42  
7.216

2.417  
2.398  
2.379  
2.360

1.261  
1.242  
1.223

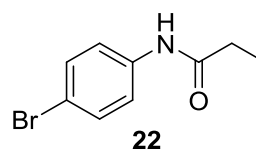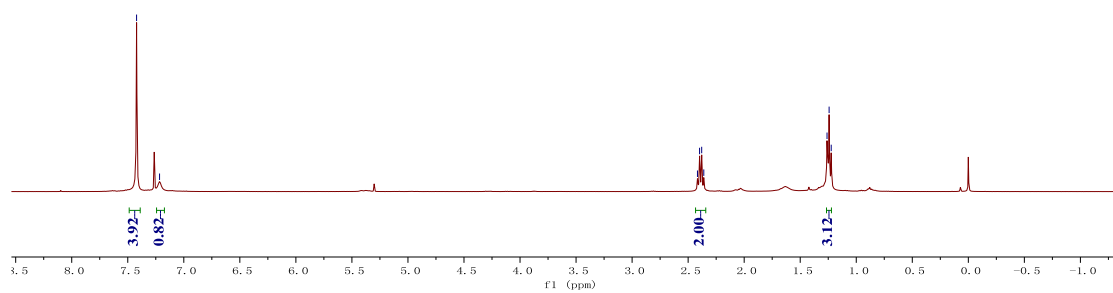

# <sup>1</sup>H NMR (400MHz, CDCl<sub>3</sub>) spectrum of product 23

hy-207-h-c. 1. F1d

7.662  
7.641  
7.591  
7.566  
7.545

2.455  
2.436  
2.417  
2.398

1.269  
1.250  
1.231

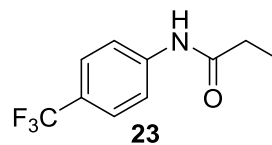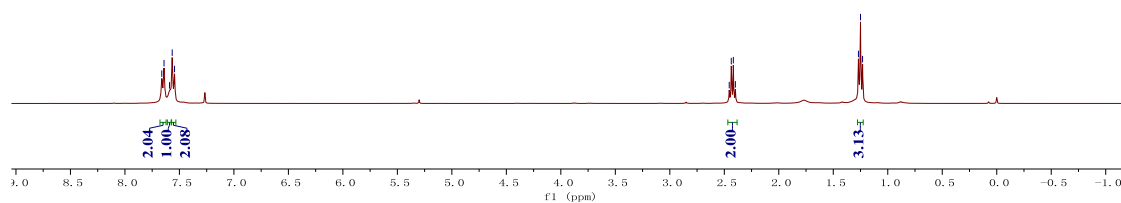

# <sup>19</sup>F NMR (376 MHz, CDCl<sub>3</sub>) spectrum of product 23

hy-207-h-c. 2. F1d

-62.11

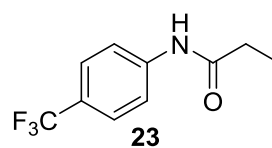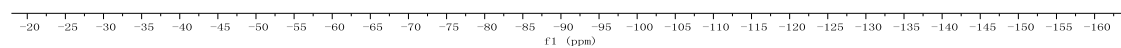

# <sup>13</sup>C NMR (100MHz, CDCl<sub>3</sub>) spectrum of product 23

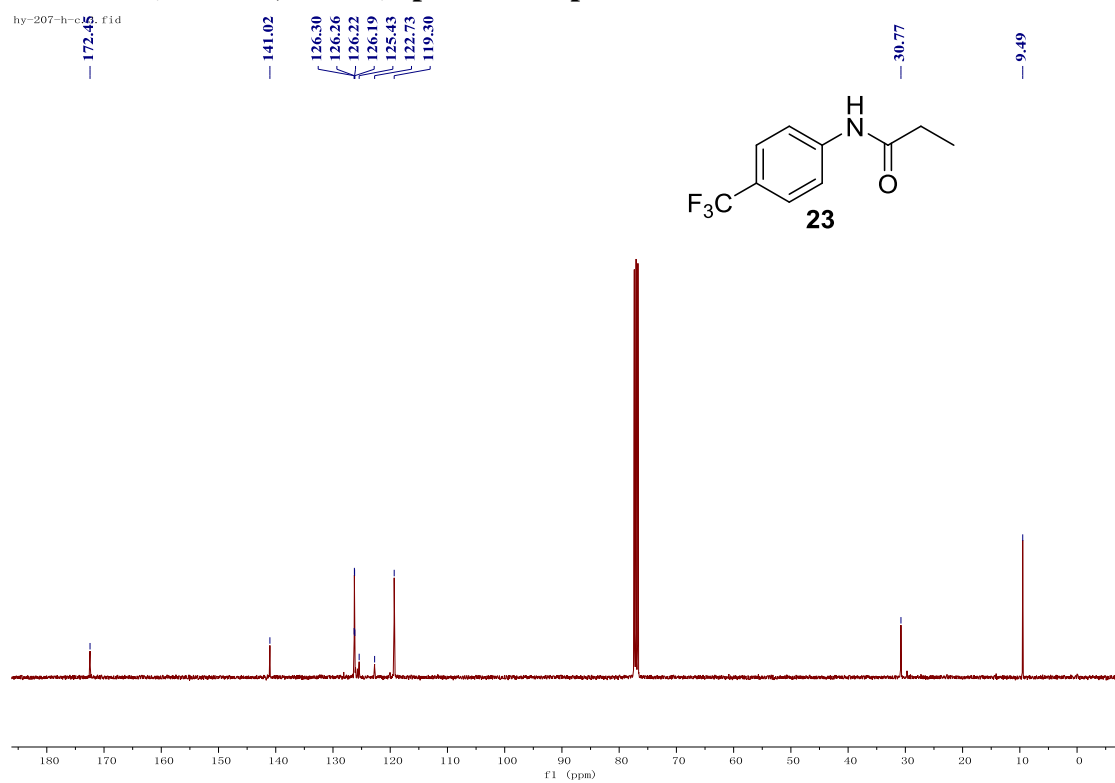



# <sup>1</sup>H NMR (400MHz, CDCl<sub>3</sub>) spectrum of product 24

HY-226, 1. f1d

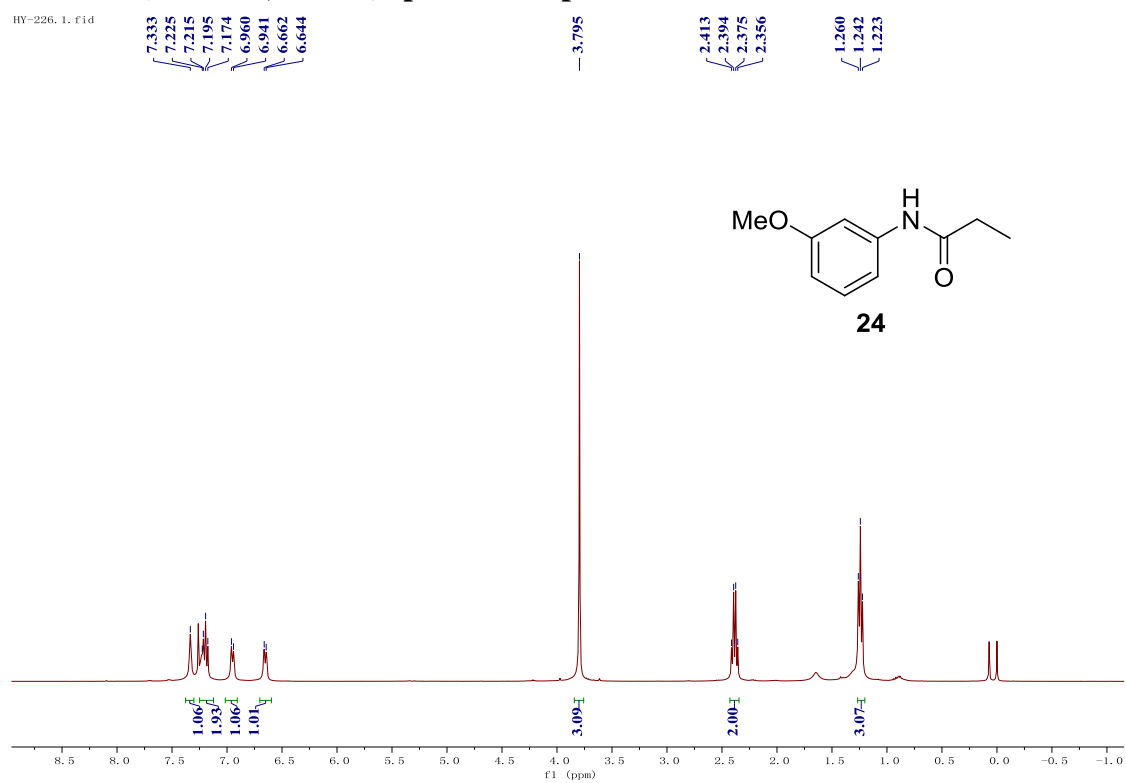

# <sup>1</sup>H NMR (400MHz, CDCl<sub>3</sub>) spectrum of product 25

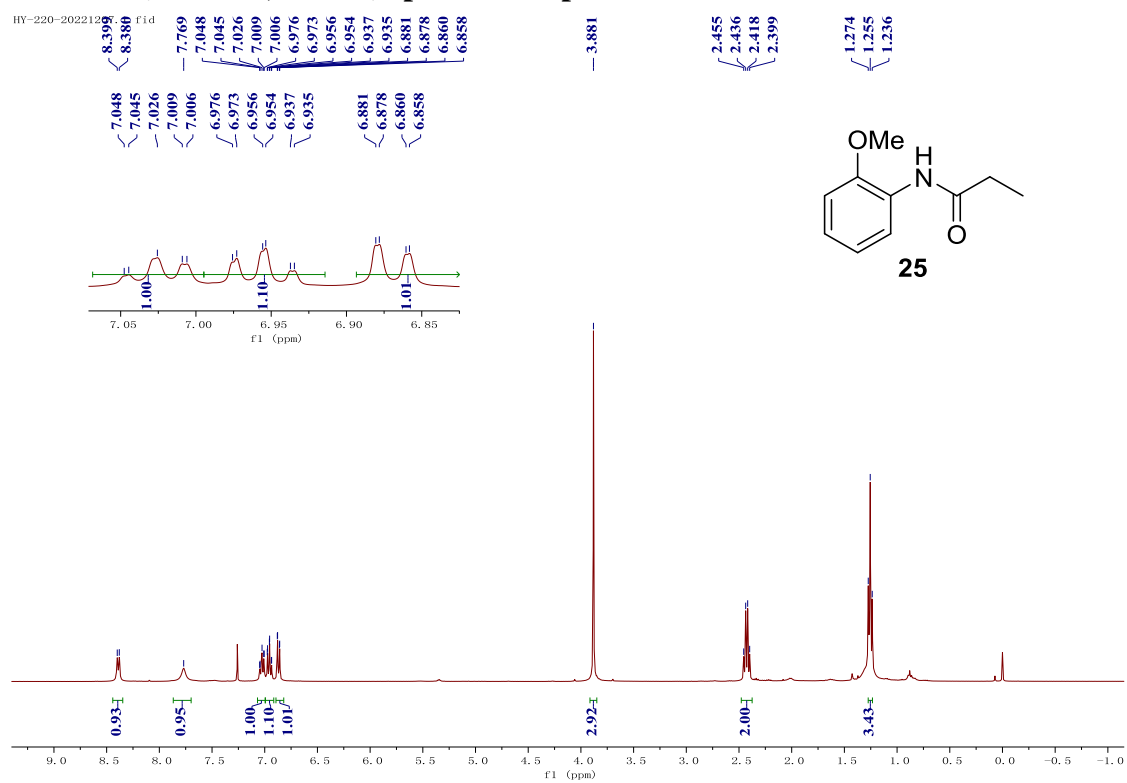

**<sup>1</sup>H NMR (400MHz, CDCl<sub>3</sub>) spectrum of product 26**

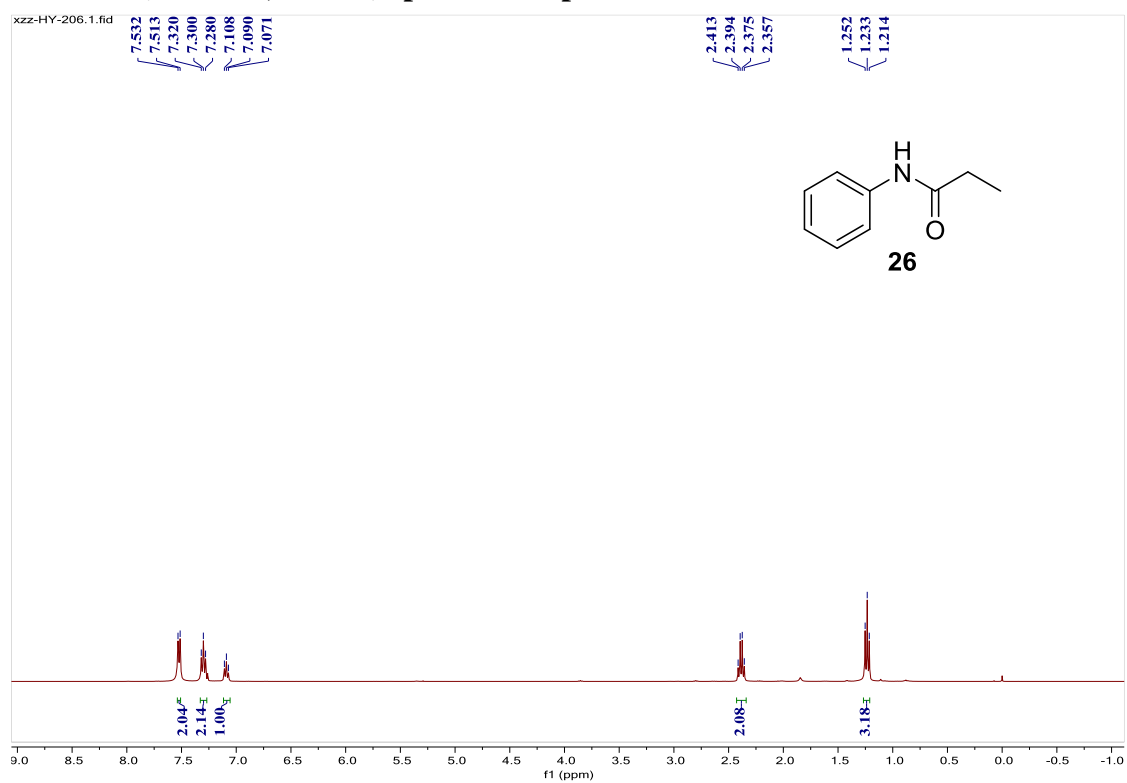

**<sup>1</sup>H NMR (400MHz, CDCl<sub>3</sub>) spectrum of product 27**

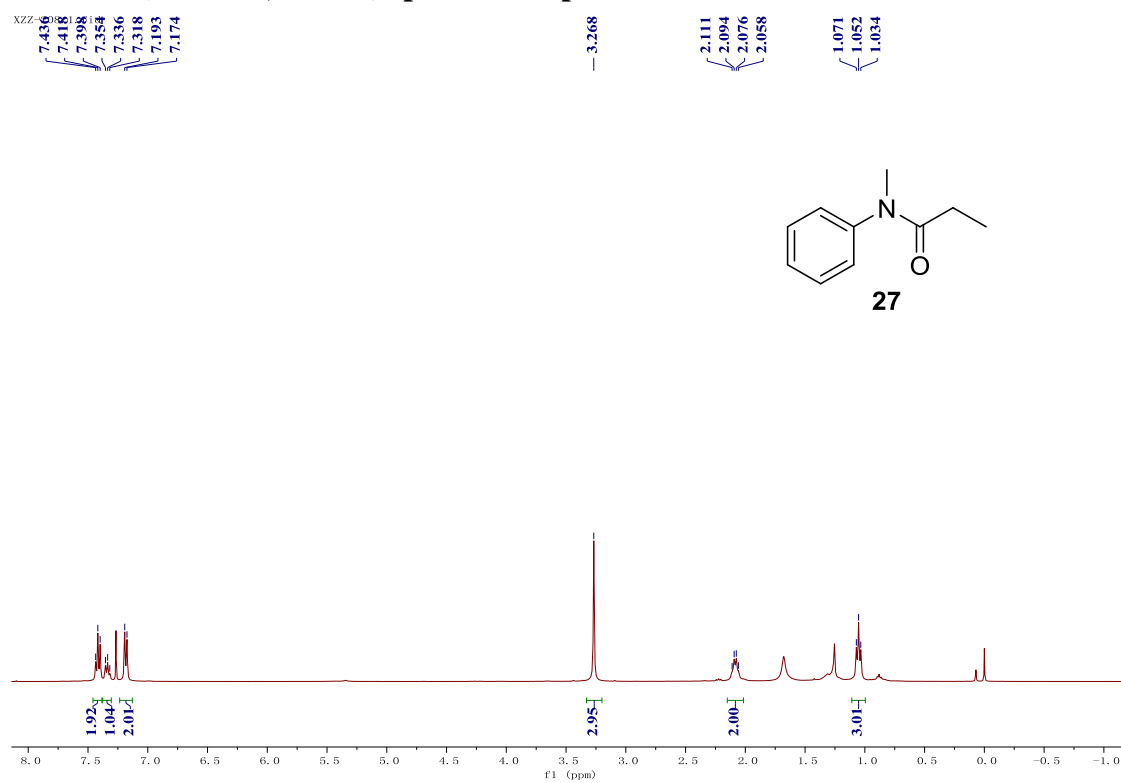

# <sup>1</sup>H NMR (400MHz, CDCl<sub>3</sub>) spectrum of product 28

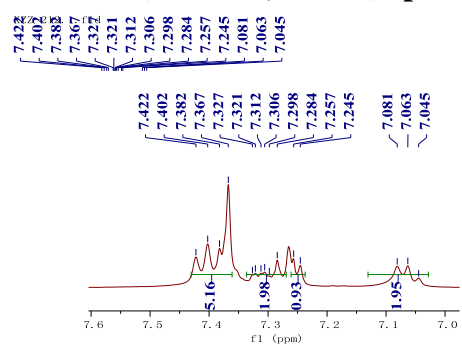

3.744  
3.726  
3.708  
3.690

1.646  
1.608  
1.590

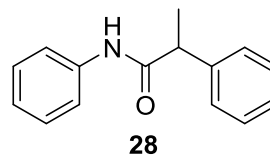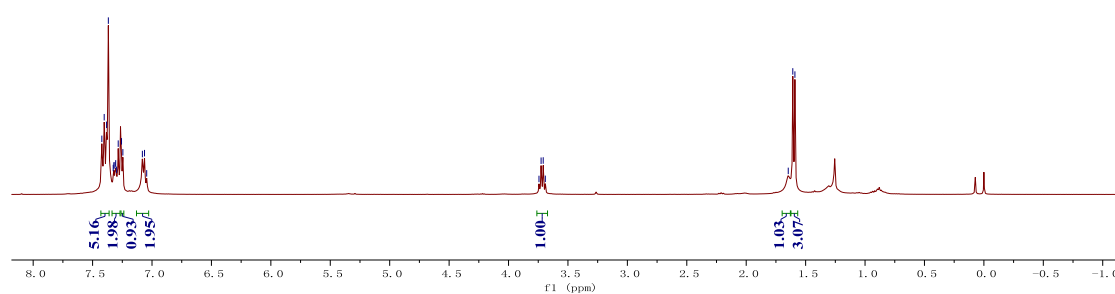

# <sup>1</sup>H NMR (400MHz, CDCl<sub>3</sub>) spectrum of product 29

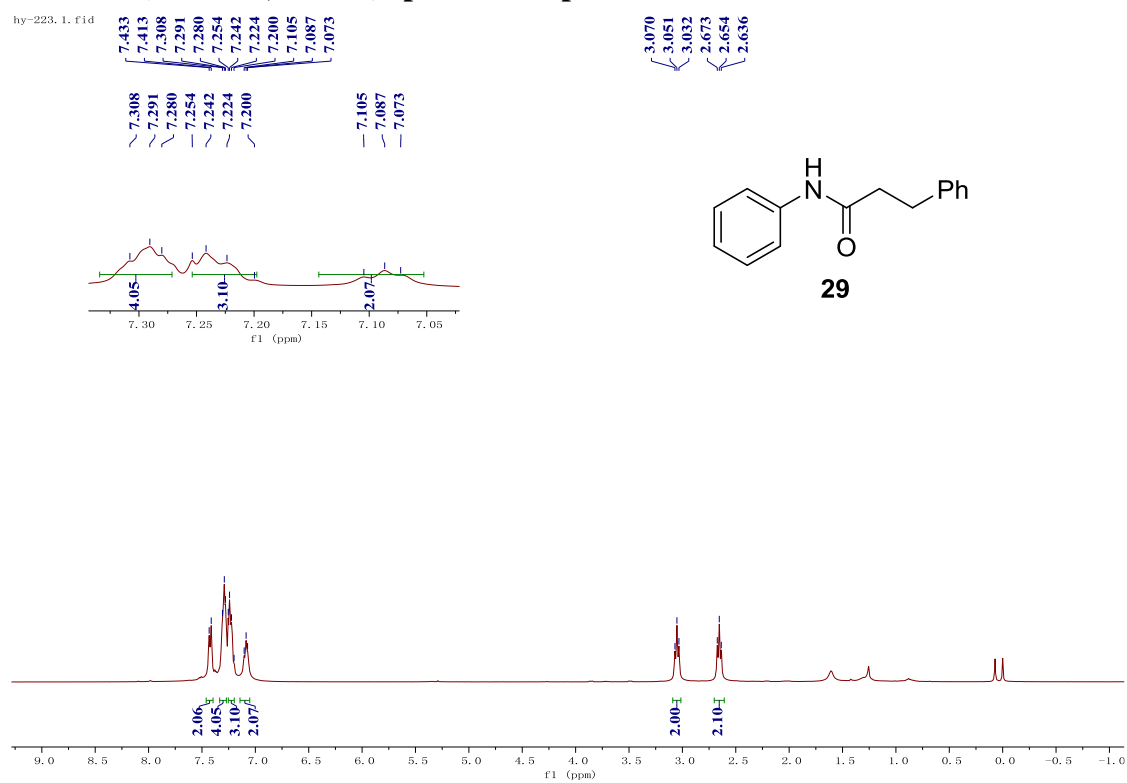

**<sup>1</sup>H NMR (400MHz, CDCl<sub>3</sub>) spectrum of product 30**

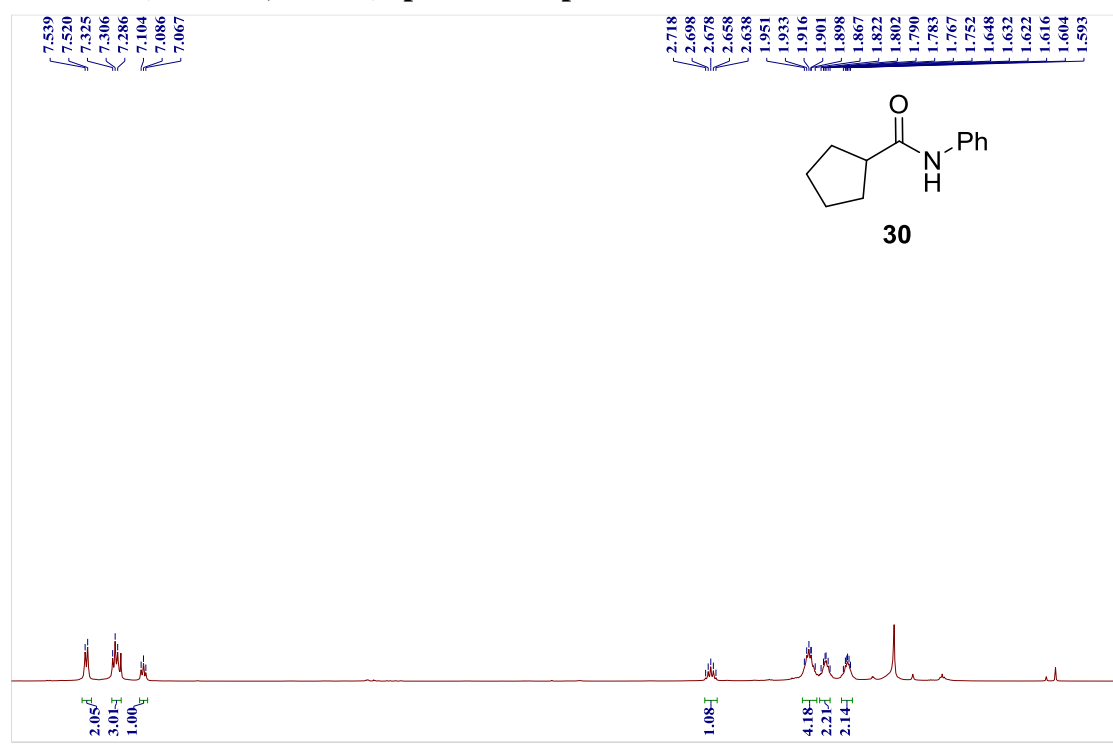

**<sup>13</sup>C NMR (100MHz, CDCl<sub>3</sub>) spectrum of product 30**

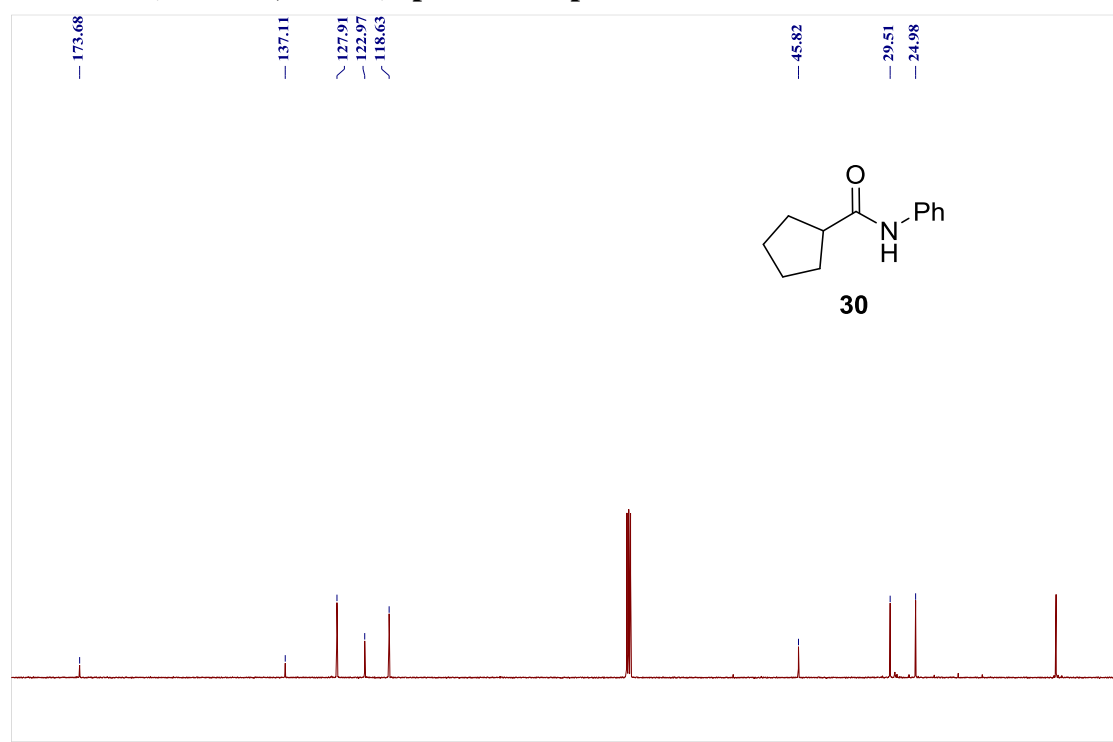

### <sup>1</sup>H NMR (400MHz, CDCl<sub>3</sub>) spectrum of product 31

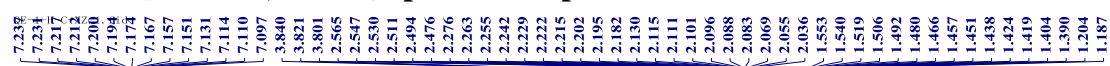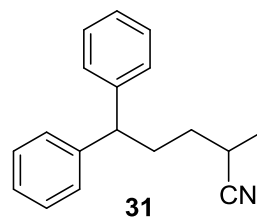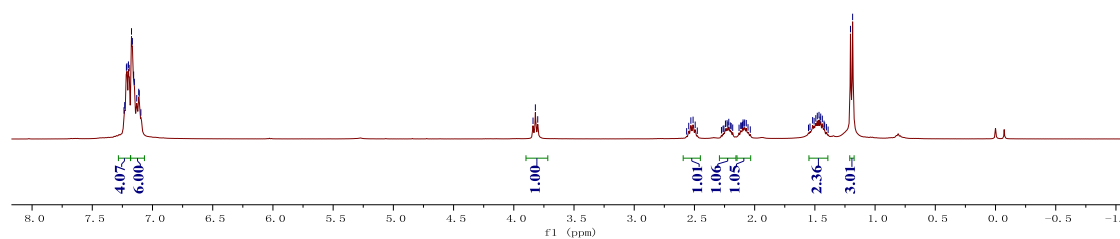

### <sup>13</sup>C NMR (100MHz, CDCl<sub>3</sub>) spectrum of product 31

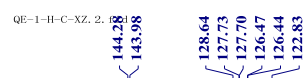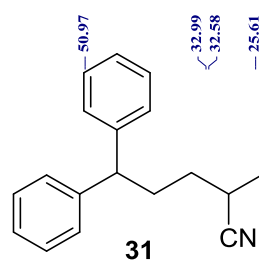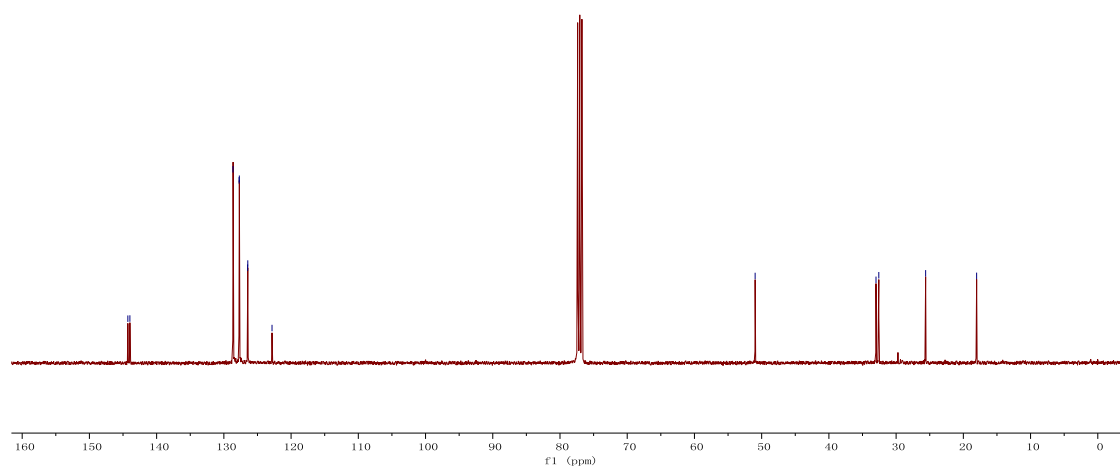

Supplement: d4qo00661e1.pdf [file d4qo00661e1.pdf]
